# Supplementary material for: Tissue-specific mitochondrial HIGD1C promotes oxygen sensitivity in carotid body chemoreceptors
Source: eLife journal article supplement (doi:10.7554/elife.78915), 2022-10-18
Supplement: fig5-data1 [file elife-78915-fig5-data1-v3.zip]

Figure 5 – panel A

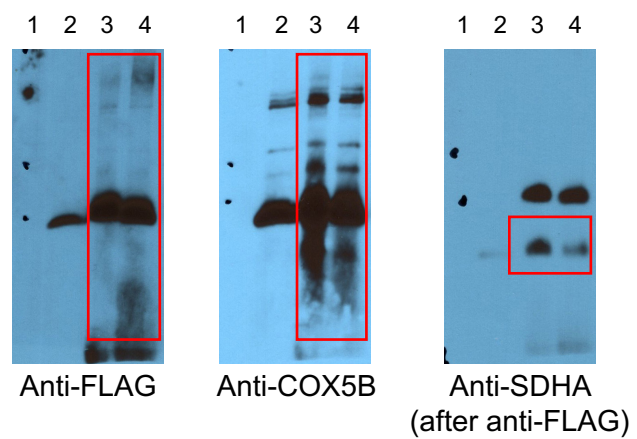

Figure 5 – panel B

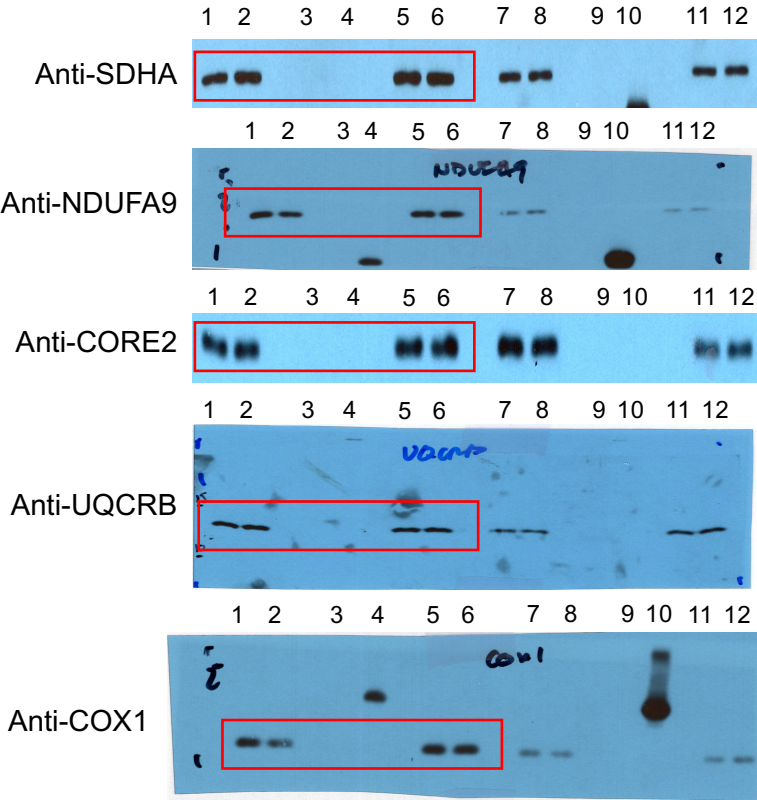

- 1. Extract control
  - 2. Unbound control
  - 3. IP control
  - 4. IP FLAG
  - 5. Unbound FLAG
  - 6. Extract FLAG
- } HIGD1A-KO + HIGD1C-FLAG

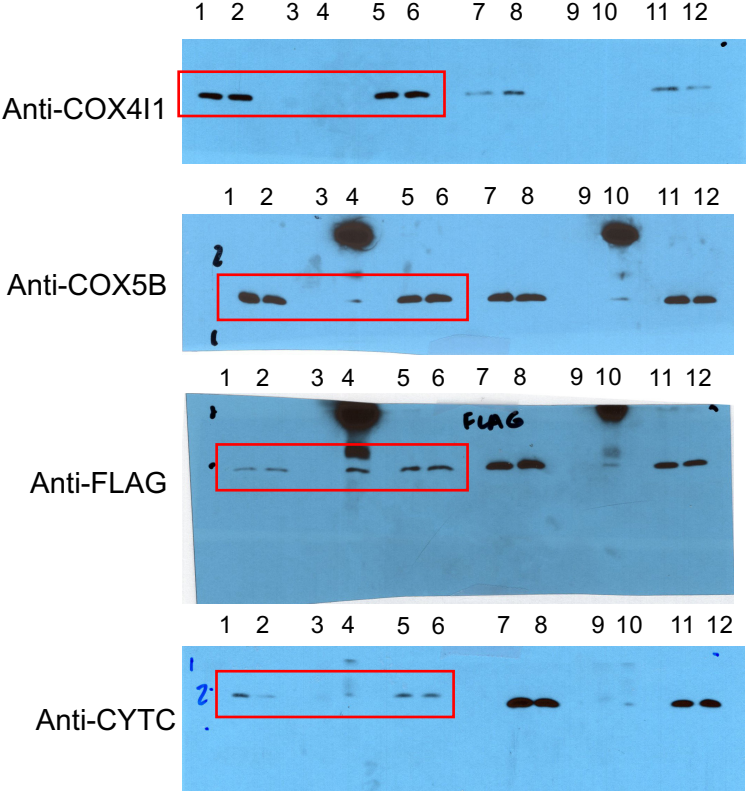

- 7. Extract control
  - 8. Unbound control
  - 9. IP control
  - 10. IP FLAG
  - 11. Unbound FLAG
  - 12. Extract FLAG
- } Figure5-figure supplement 2 panel D

Figure 5 – panel C

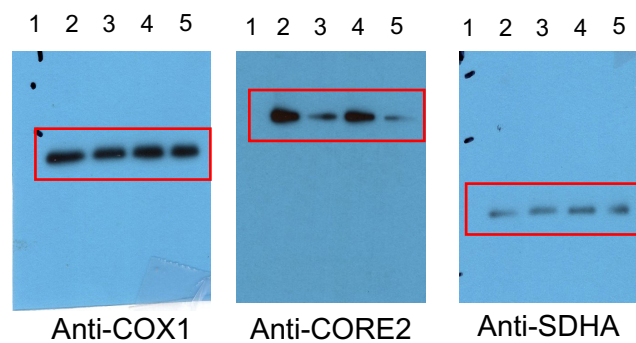

**DDM**

1. Ladder (apoferritin 450/900kDa)
2. WT
3. HIGD1A-KO+EV
4. HIGD1A-KO+HIGD1A
5. HIGD1A-KO+HIGD1C

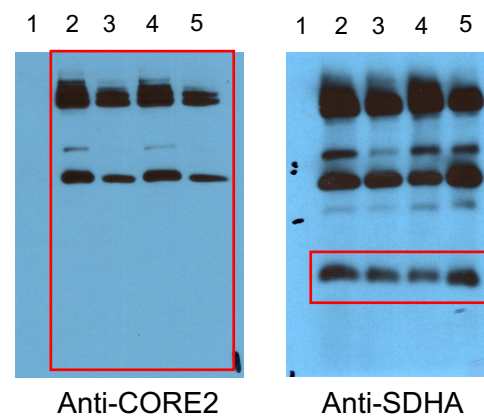

**DIGITONIN**

1. Ladder (apoferritin 450/900kDa)
2. WT
3. HIGD1A-KO+EV
4. HIGD1A-KO+HIGD1A
5. HIGD1A-KO+HIGD1C
