# Supplementary material for: Tissue-specific mitochondrial HIGD1C promotes oxygen sensitivity in carotid body chemoreceptors
Source: eLife journal article supplement (doi:10.7554/elife.78915), 2022-10-18

Figure 5 figure supplement 2– panel A

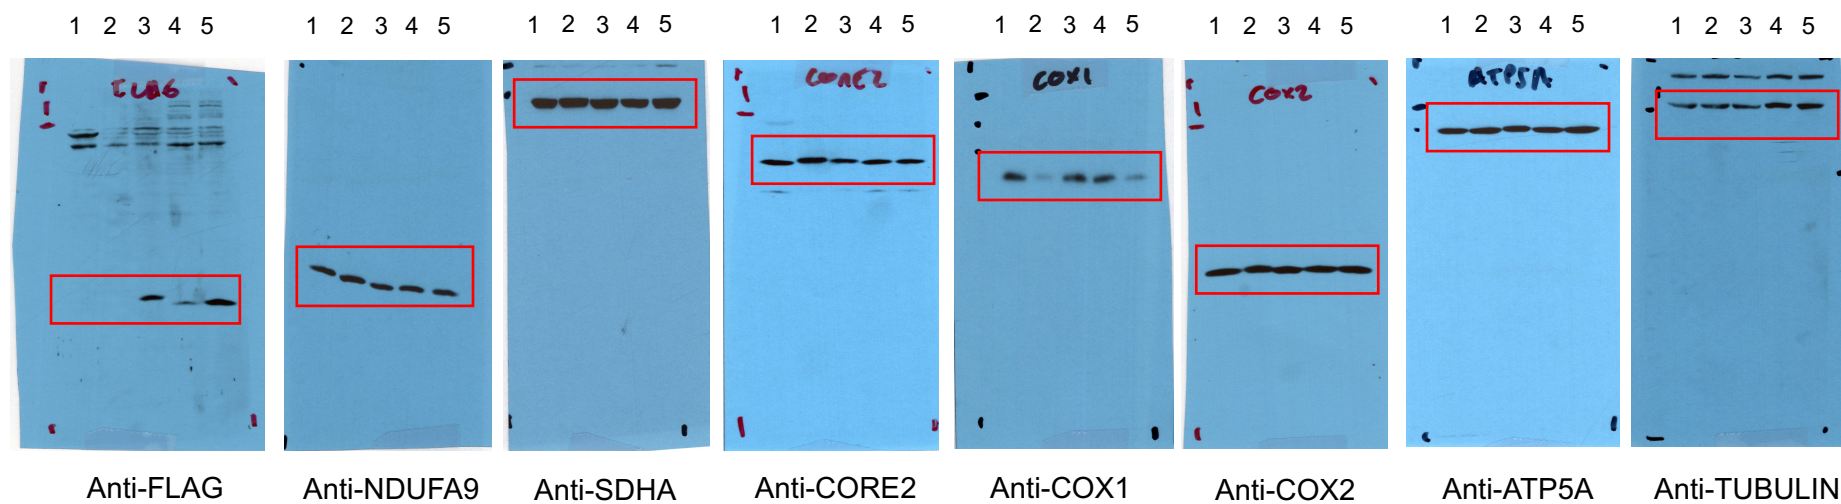

1. WT
2. HIGD1A-KO+EV
3. HIGD1A-KO+HIGD1A
4. HIGD1A-KO+HIGD1C
5. HIGD1A-KO+Higd1c

Figure 5 figure supplement 2– panel B

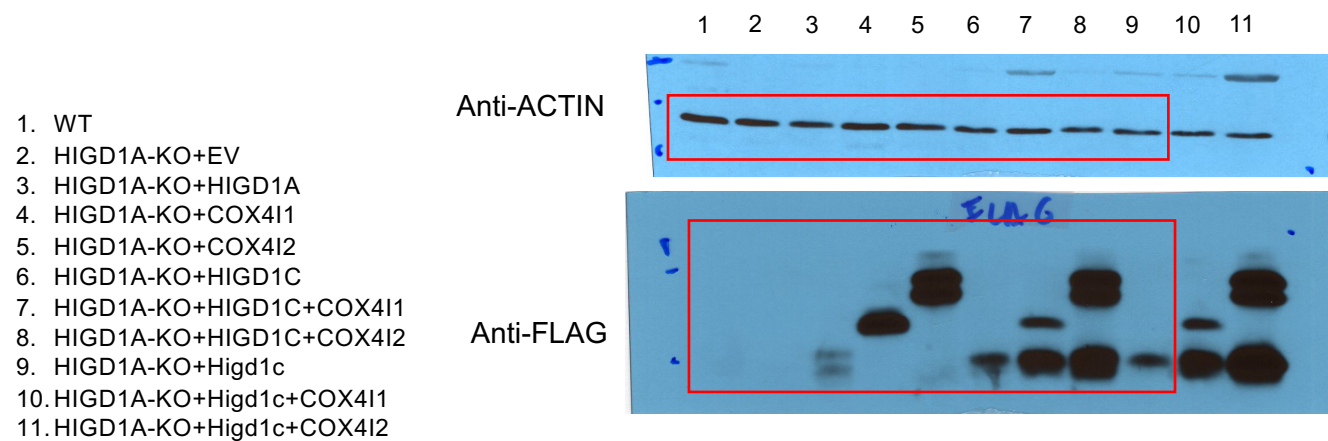

Figure 5 figure supplement 2– panel C

- 1. WT
- 2. HIGD1A-KO+EV
- 3. HIGD1A-KO+HIGD1A
- 4. HIGD1A-KO+HIGD1C
- 5. HIGD1A-KO+HIGD1C+COX4I2
- 6. HIGD1A-KO+HIGD1C+COX4I2+siCOX4I1

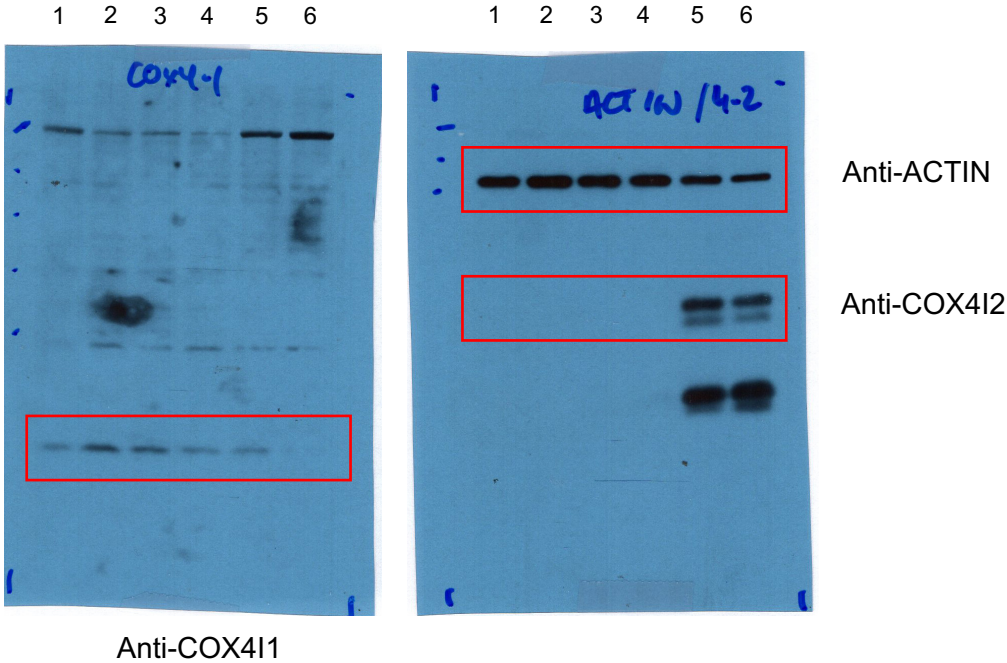

Figure 5 figure supplement 2– panel D

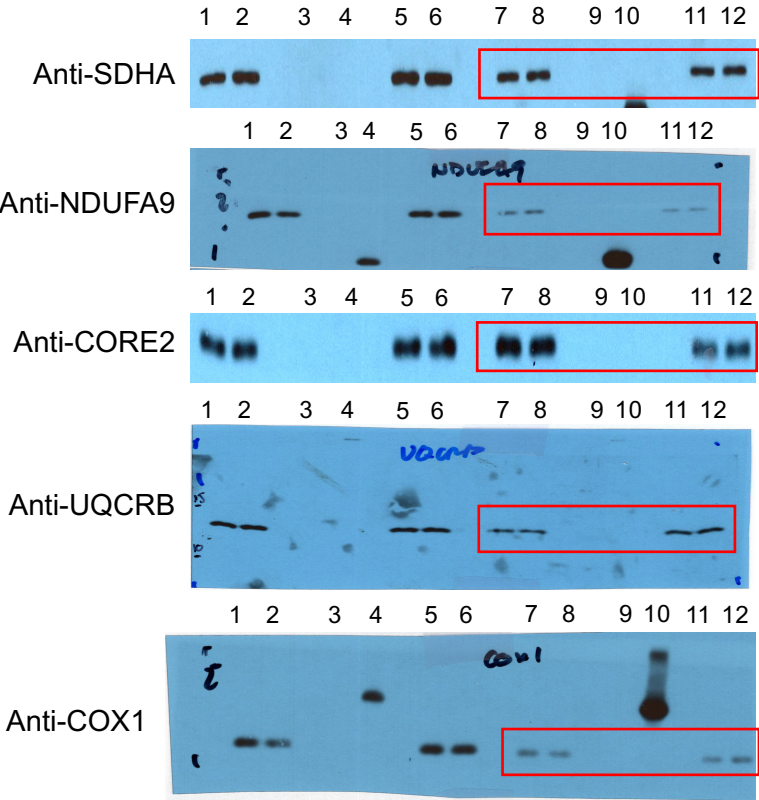

- 1. Extract control
  - 2. Unbound control
  - 3. IP control
  - 4. IP FLAG
  - 5. Unbound FLAG
  - 6. Extract FLAG
- Figure5-panel B

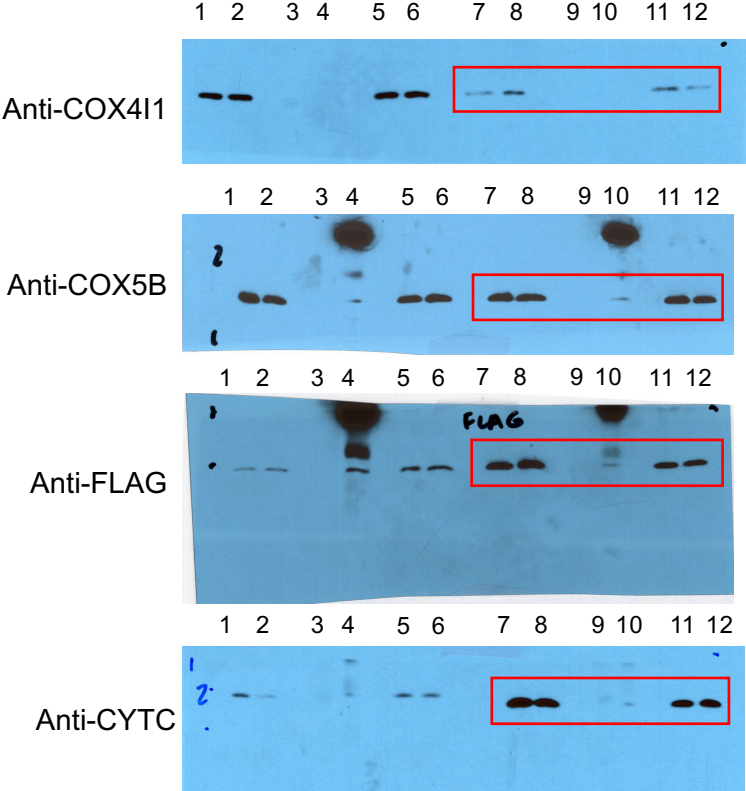

- 7. Extract control
  - 8. Unbound control
  - 9. IP control
  - 10. IP FLAG
  - 11. Unbound FLAG
  - 12. Extract FLAG
- HIGD1A-KO  
+Higd1c-FLAG

Figure 5 figure supplement 2– panel E

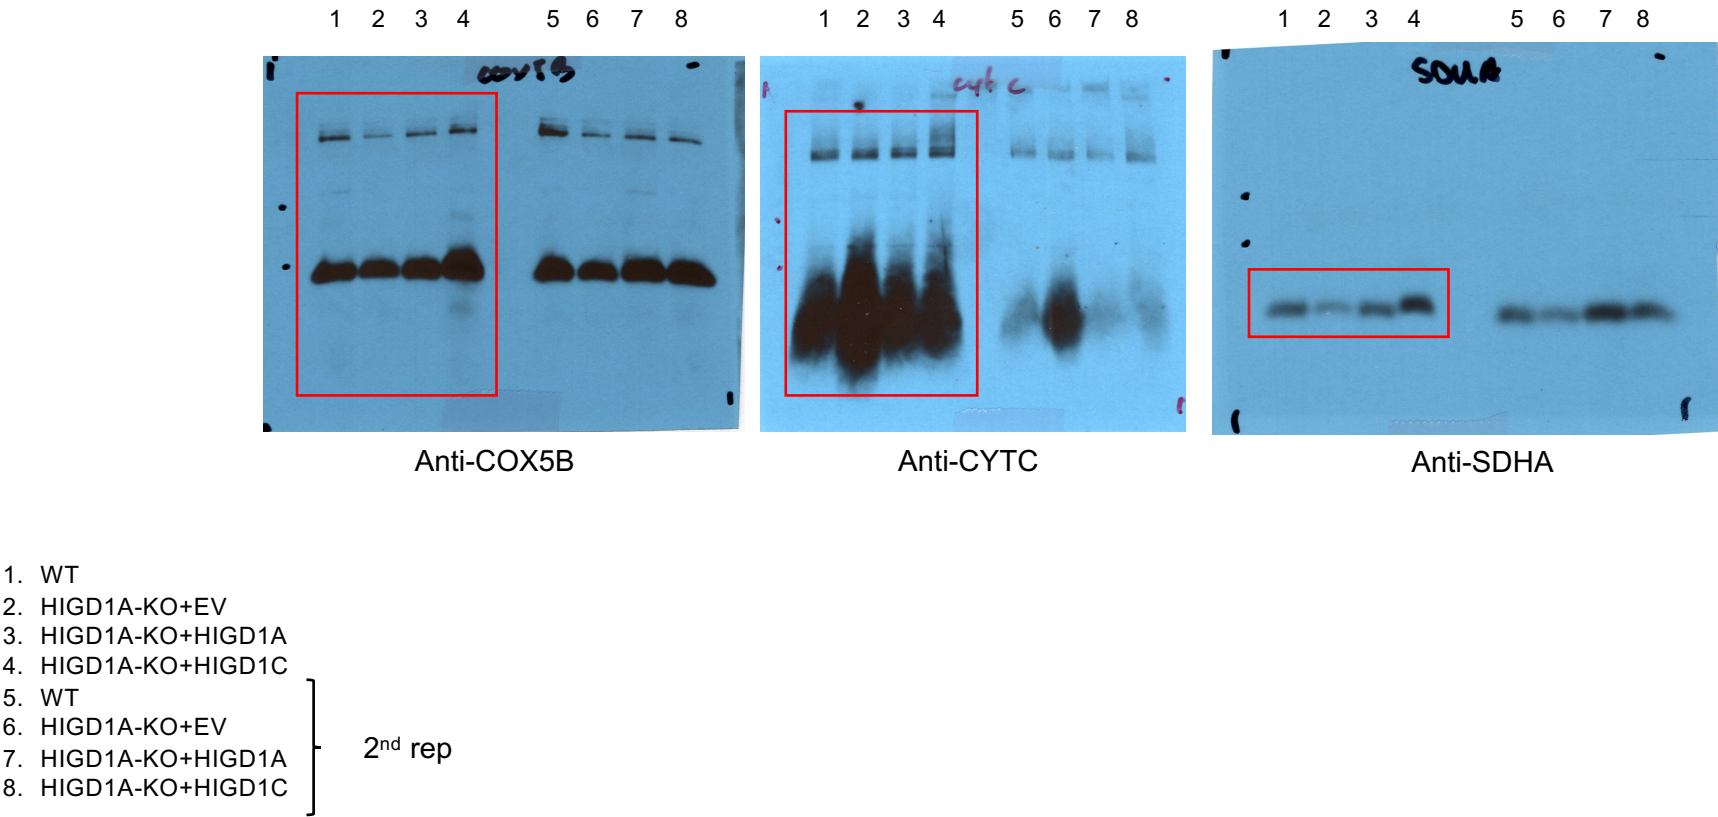

Supplement: supp [file elife-78915-supp-v1.zip]
