# Supplementary material for: Tissue-specific mitochondrial HIGD1C promotes oxygen sensitivity in carotid body chemoreceptors
Source: eLife journal article supplement (doi:10.7554/elife.78915), 2022-10-18

Figure 5 - figure supplement 3– panel A

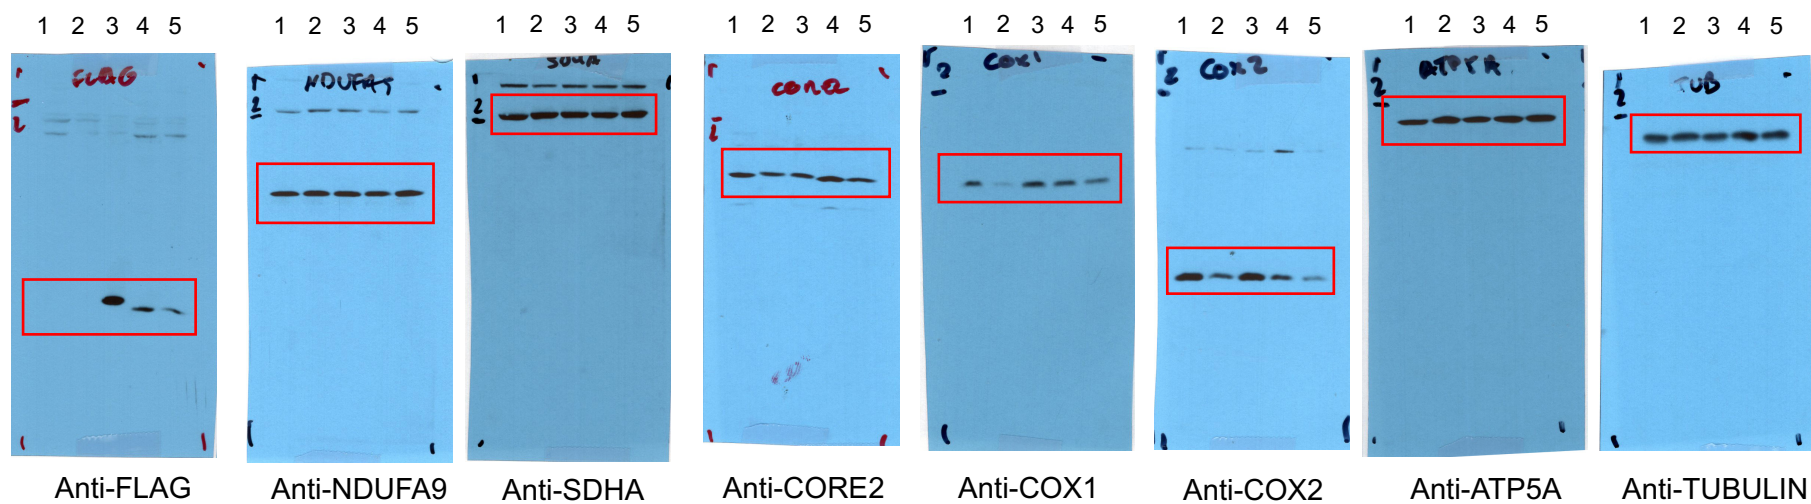

1. WT
2. HIGD2A-KO+EV
3. HIGD2A-KO+HIGD2A
4. HIGD2A-KO+HIGD1C
5. HIGD2A-KO+Higd1c

Figure 5 – figure supplementary 3 - panel B

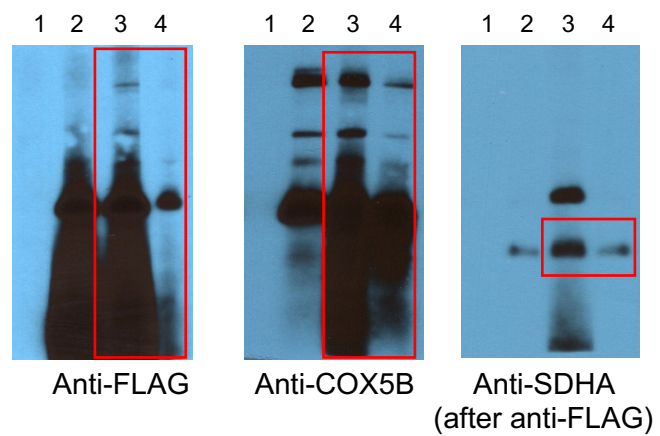

1. Ladder (apoferritin)
2. HIGD2A-KO+HIGD2A
3. HIGD2A-KO+HIGD1C
4. HIGD2A-KO+Higd1c

Figure 5 – figure supplementary 3 - panel C

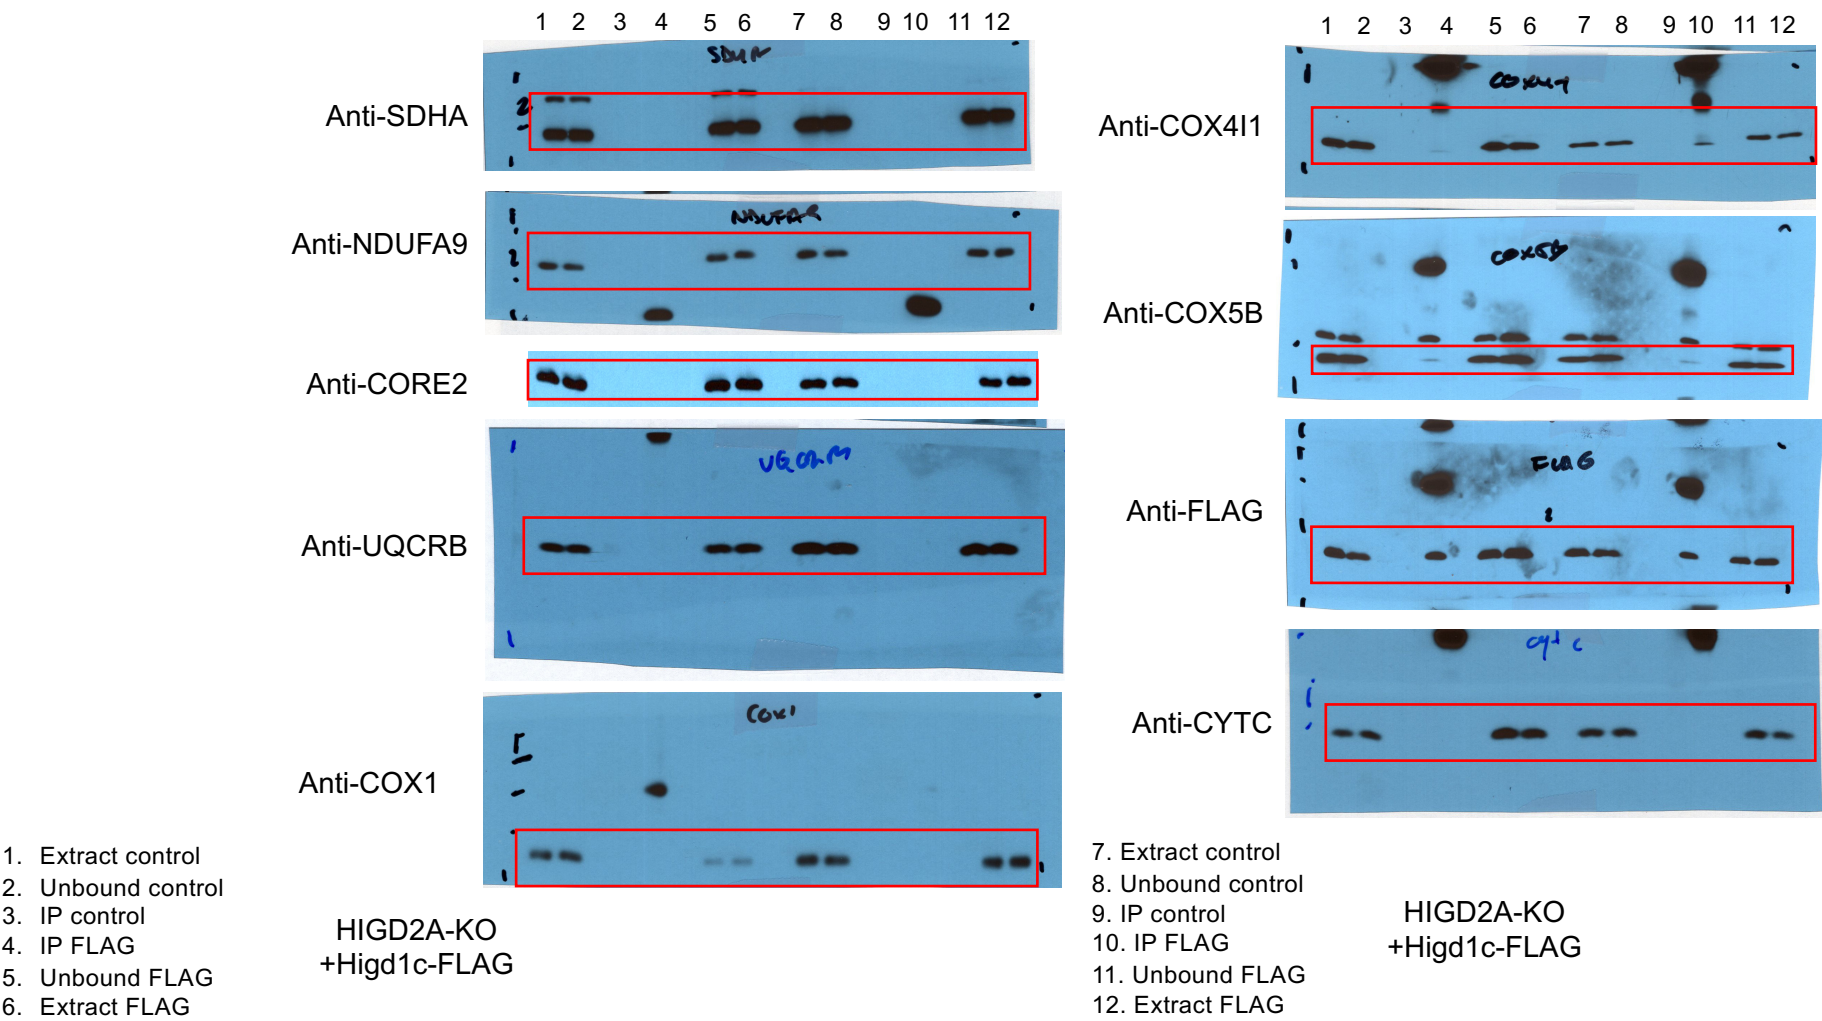

Figure 5 – figure supplementary 3 - panel D

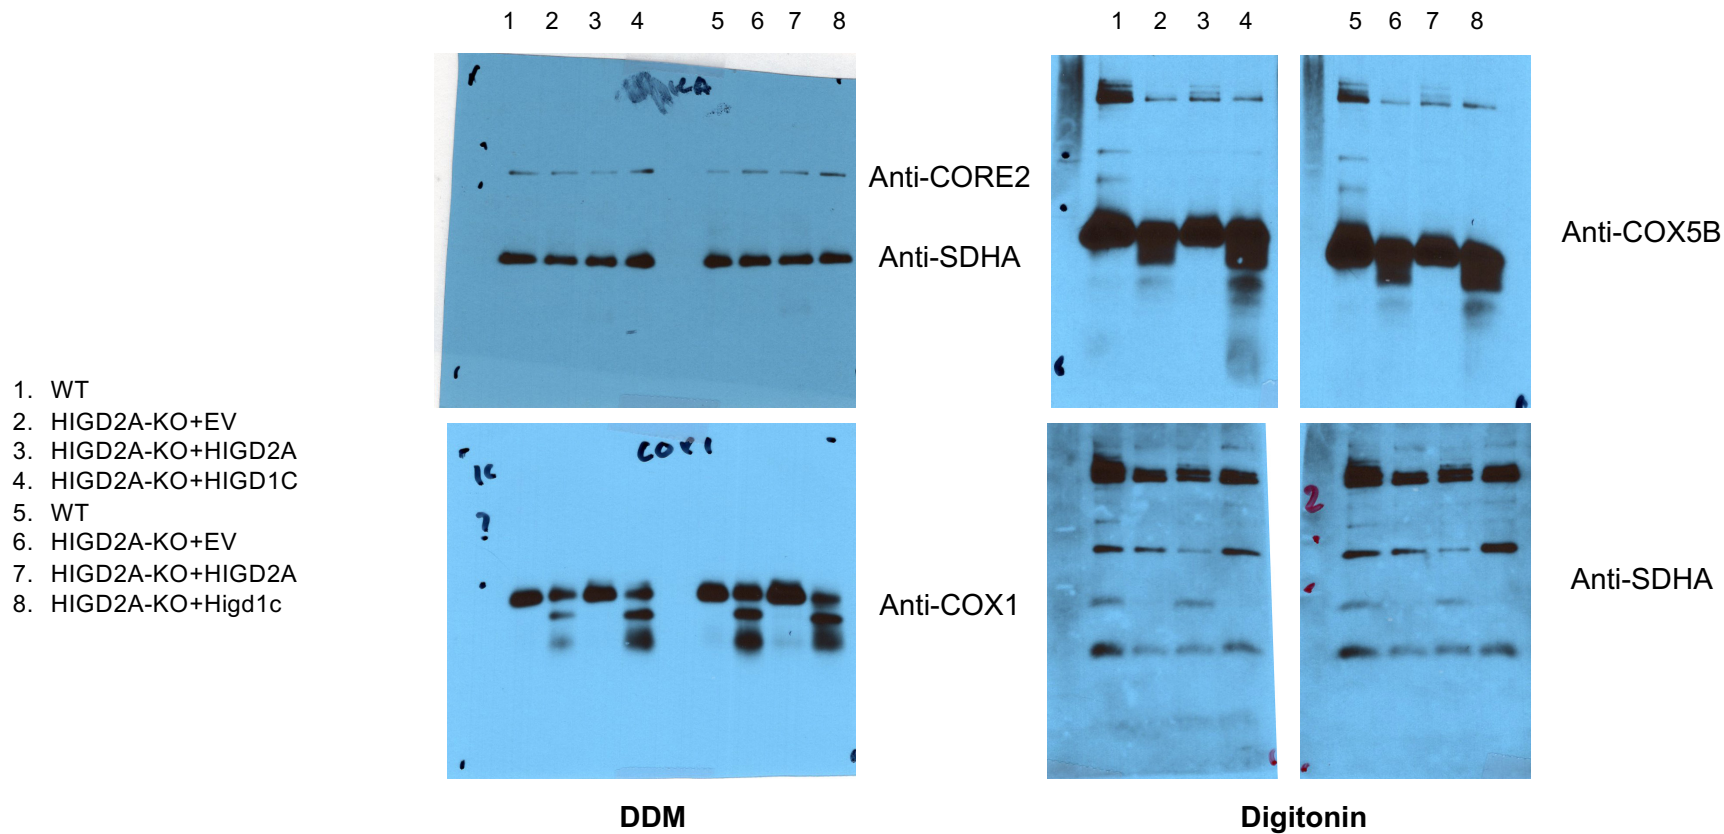

Supplement: supp [file elife-78915-supp-v1.zip]
