# Supplementary material for: Tissue-specific mitochondrial HIGD1C promotes oxygen sensitivity in carotid body chemoreceptors
Source: eLife journal article supplement (doi:10.7554/elife.78915), 2022-10-18
Supplement: supp [file elife-78915-supp-v1.zip]

## Sheet: Fig 3-S1A
Time (min)	Higd1c+/+
0	1	1	1	1	1	1	1	1	1	1	1	1	1	1	1	1	1	1	1	1	1	1	1	1	1	1	1	1	1	1	1	1	1	1	1	1	1	1	1	1	1	1	1	1	1	1	1	1	1
0.75	1.07742	1.10908	1.04473	1.08903	1.02019	1.04087	1.10307	1.05775	1.06686	0.895199	3.38028	3.12742	1.67658	1.66305	1.09307	1.12585	1.28406	1.15388	1.03343	1.08865	1.18933	1.41077	1.16141	1.03233	1.12382	0.916817	1.60971	1.58714	1.53681	1.66006	1.49216	1.64276	1.50547	1.3298	1.08911	1.06985	1.0722	1.15095	1.16368	1.04316	1.01373	1.0097	0.946494	1.51516	0.516297	0.885048	1.02013	1.09413	1.09495
1.5	1.06651	1.18021	1.1029	1.01289	1.0077	1.04176	1.04677	1.01606	1.08672	1.18337	3.00704	2.67742	1.58578	1.70246	1.08231	1.09442	1.20967	1.20731	1.11076	1.27972	1.144	1.4436	1.25458	1.10947	1.10993	1.28309	1.45784	1.4674	1.46204	1.50857	1.45106	1.48046	1.51746	1.33333	1.09488	1.02992	1.15607	1.08011	1.01945	1.04523	1.19045	1.08783	0.920088	1.5577	0.50354	0.943461	1.09186	1.03672	1.03673
2.25	1.1573	1.12935	1.058	1.06854	1.02646	1.07199	1.04419	1.07489	1.03746	1.07319	3.01408	2.49032	1.57835	1.57389	1.06678	1.08592	1.15348	1.15548	1.1103	1.28571	1.1939	1.21801	1.20825	1.07877	1.12655	1.03053	1.5249	1.44547	1.49723	1.44455	1.44133	1.48845	1.39251	1.34414	0.966727	0.990235	1.06161	1.06766	1.03847	1.02167	1.09291	1.02076	0.909825	1.44748	0.477358	0.886818	1.05811	1.03585	1.05156
3	1.12826	1.13377	1.04533	1.01662	1.01642	1.07288	1.0848	1.04972	1.06677	1.02164	4.08216	2.62419	1.51309	1.49335	1.01882	1.05882	1.10075	1.15479	1.10712	1.20395	1.21562	1.28451	1.29022	1.05805	1.11489	0.998437	1.47682	1.42709	1.41136	1.43788	1.39087	1.5111	1.35381	1.2912	0.955526	1.02704	0.996688	1.09229	0.999033	1.06922	1.0158	0.973993	0.895526	1.42018	0.489647	0.89848	1.05914	1.03462	1.0331
3.75	1.08602	1.03663	1.3212	1.17426	0.882006	0.871531	0.896237	0.871256	0.921152	1.01823	2.69249	2.65	1.47011	1.52143	0.984314	0.989909	1.0725	1.09406	1.14464	1.68763	1.03581	1.13552	1.09878	5.32742	1.48561	1.17863	1.4248	1.48518	1.31995	1.32965	1.30058	1.34925	1.39693	1.16479	0.955856	0.909239	0.981982	0.995498	1.22751	1.21857	1.69301	1.25653	0.967136	1.38971	0.493321	0.887026	1.02116	0.894216	0.89778
4.5	1.05238	0.888307	0.905179	0.764647	0.874675	0.842539	1.0563	2.12263	0.903124	0.950026	1.53286	1.72097	1.21357	1.27586	0.815656	0.84561	0.824545	1.04498	1.03207	1.09194	0.841143	0.957071	0.966395	2.89352	0.869727	0.94747	1.143	1.20954	1.17097	1.19874	1.09724	1.14276	1.21813	1.03552	0.756548	0.777041	0.830419	0.866128	0.79914	0.825709	0.854805	0.820007	0.726015	1.16913	0.419249	2.21918	1.41375	0.758896	0.865691
5.25	0.92043	0.891905	0.836806	0.733419	0.736599	0.767355	0.782047	0.859154	0.807474	0.984523	2.33568	6.49516	1.14572	2.15813	0.777263	0.839988	0.794727	1.01712	0.90539	1.26415	0.766857	0.957912	0.885438	0.961553	0.714144	0.835557	1.10478	1.12181	1.19698	1.1311	1.6324	1.18228	1.19289	1.14825	0.711415	0.785303	0.829491	0.820312	0.802579	0.845056	0.836766	0.764458	0.680581	1.06826	0.363746	0.709808	0.815717	0.718843	0.776589
6	0.884178	4.00998	0.840208	0.73213	0.731711	0.763543	0.823751	0.890846	0.871707	0.860834	6.39671	2.58387	1.10889	1.19236	0.773977	0.836385	0.853421	1.05091	1.12145	1.12189	0.828952	1.13636	1.06976	3.60879	0.896526	0.838082	1.07717	1.13308	1.04322	1.137	1.04489	1.06439	1.09865	1.03574	0.716192	0.775413	0.798622	0.803099	0.751209	0.817025	0.78592	0.735599	0.684502	0.964219	0.380243	0.698667	0.800503	0.713409	0.767003
6.75	0.788479	0.768275	0.796156	0.705415	0.722892	0.752372	0.752755	0.78259	0.810449	0.836438	1.70188	1.77903	1.1748	1.25468	0.788019	0.83725	0.823289	0.972374	0.999318	0.924528	0.764571	1.20455	1.7887	2.6355	0.724566	0.770285	1.25493	1.46503	1.0392	1.24333	1.13088	1.45715	1.17943	1.10015	0.699391	0.752253	0.781399	0.788136	0.743149	0.783319	0.729566	0.764686	1.46137	1.01523	0.383382	0.682424	0.769275	0.66617	1.1672
7.5	0.878187	0.89861	0.836466	0.769302	0.782235	0.797943	0.846391	0.88833	0.859893	0.854801	1.47183	1.4871	1.1063	1.12857	0.788019	0.825141	0.783741	0.853425	0.824198	0.884397	0.67581	0.754209	0.935336	0.767819	0.815881	0.868253	1.29586	1.33906	1.14324	1.22199	1.05577	1.32527	1.10223	1.0203	0.722945	0.782173	0.754902	0.832495	0.805696	0.85718	0.81689	0.785331	0.68577	0.997845	0.371961	0.679613	0.828071	0.796582	0.796771
8.25	1.00568	0.991496	0.949145	0.896863	0.840992	0.910098	0.926125	0.943686	0.956682	0.905299	2.97653	2.39194	1.27884	1.26823	0.855841	0.927058	0.894852	0.945434	0.929043	0.996107	0.838476	1.10269	1.02138	0.895144	0.905211	0.891814	1.32668	1.34262	1.24957	1.24809	1.20473	1.2429	1.21287	1.08559	0.854719	0.850776	0.83691	0.921213	0.91424	0.923904	0.940054	0.821376	0.752306	1.16008	0.43588	0.791337	0.907801	0.894216	0.900706
9	1.11582	1.11267	1.01726	0.962684	0.919407	0.95301	1.05282	1.03535	1.04901	0.951731	10.7911	3.91613	1.36187	1.42167	0.907828	1.04555	1.01946	1.04064	0.996816	1.08326	0.944	1.47727	1.26222	0.953314	1.05459	0.872941	1.42825	1.26971	1.2641	1.37881	1.28667	1.34858	1.39167	1.07699	0.91237	0.934402	0.808691	1.00649	0.934229	1.00688	0.94652	0.869625	0.811116	1.21368	0.458055	0.862245	0.944063	0.931814	0.937336
9.75	0.996006	1.04366	0.988434	0.969274	0.914626	0.956822	1.00328	1.02277	0.990286	0.881296	2.83333	2.46613	1.36995	1.43498	0.922468	1.01081	0.912116	1.04566	0.958381	0.996406	0.902095	1.02946	1.04022	0.936338	0.973697	0.780022	1.36292	1.33076	1.29011	1.3245	1.31487	1.26599	1.27093	1.02956	0.82787	0.907236	0.76868	0.997219	0.926814	0.97601	0.979486	0.838257	0.800738	1.19155	0.454515	0.818825	0.885038	0.913935	0.910696
10.5	1.07711	1.05151	1.03725	1.03889	0.95107	1.00807	1.03992	1.05931	0.987398	0.911464	7.67606	3.00161	1.27173	1.34852	0.945025	1.0568	0.975518	1.05548	0.962929	0.977538	0.969143	1.29461	1.11965	0.980901	0.962531	0.859599	1.33728	1.28897	1.19354	1.36319	1.28528	1.27154	1.35991	1.10214	0.84846	0.931022	0.81876	1.03046	0.977431	1.04953	0.954821	0.869397	0.844211	1.21124	0.493254	0.831424	0.946122	0.932252	0.935721
11.25	3.16006	1.0538	1.26652	1.07248	0.980131	0.995124	1.06573	1.06243	1.03247	0.953305	1.24413	1.49355	1.33861	1.45862	0.973857	1.04036	0.989642	0.990639	0.945645	1.02276	0.927619	1.19697	1.10591	1.01448	0.987841	0.830028	1.28871	1.21251	1.19526	1.35328	1.35319	1.37544	1.3597	1.24443	0.890957	0.947922	0.824589	1.00344	0.971736	1.06294	0.983796	0.891183	0.824839	1.23365	0.488846	0.880258	0.996225	0.958983	0.934813
12	1.13733	1.01766	1.05647	0.999427	2.80322	1.09682	1.16265	1.20639	2.07552	1.27768	2.81925	1.93065	1.36575	1.45443	0.997162	1.04887	1.01224	1.11279	1.00932	1.06589	1.03581	1.07323	1.14104	0.978904	0.924566	0.834115	1.41346	1.34558	1.24058	1.35175	1.36773	1.36745	1.34897	1.23759	0.916324	0.965824	0.847774	1.04039	0.980656	1.05572	0.957455	0.886506	0.886647	1.27605	0.521306	0.913161	1.01224	1.02209	0.972755
12.75	1.12857	1.02224	1.91734	1.19961	1.21054	1.25206	1.56697	4.86479	1.15997	1.07712	11.9319	3.94516	1.51502	1.55517	0.969226	1.05247	1.02009	1.07397	2.34546	1.02456	1.08762	1.08333	1.11762	1.09088	0.955583	0.843491	1.44995	1.42413	1.4716	1.83918	1.50025	1.57882	1.50715	1.27509	0.953714	0.993741	0.855591	4.18379	1.07104	1.48048	1.20905	0.923577	1.19188	1.43268	2.24219	1.7122	1.07012	1.05171	1.60959
13.5	1.151	1.04432	2.10698	1.19732	0.966105	1.06703	1.03565	1.03672	0.9993	0.973898	1.79343	1.82097	1.77674	1.83695	1.18883	1.94061	0.99027	1.1016	1.15533	2.9407	1.34667	1.20623	1.29582	1.03957	1.05112	0.783147	1.28575	1.35951	1.22031	1.38319	1.40516	1.78885	1.49558	1.28326	0.97381	1.02954	0.845919	1.03946	3.32724	1.21565	1.12364	2.98905	1.02802	1.26728	0.509885	0.870158	0.969115	1.01928	0.955903
14.25	1.15899	1.02764	1.03427	0.998997	2.23647	1.77356	3.58852	1.11263	1.04139	0.954092	4.55399	2.35323	1.34475	1.47759	0.925456	1.03042	0.951977	1.04429	1.19058	1.17999	1.00648	1.04125	1.18381	4.73012	1.09107	0.782546	1.39275	1.33284	1.32626	1.37024	1.33333	1.31772	1.42133	1.19656	0.881568	0.934777	0.837043	1.01907	0.932939	1.01187	0.895594	1.29725	1.23282	1.33812	0.946099	1.0681	0.972432	0.973181	0.927346
15	1.15945	1.02813	1.02585	0.998568	0.949424	0.990425	1.02641	1.0405	1.00551	0.91212	1.42488	1.77581	1.36931	1.44581	0.940992	1.0519	0.97646	1.00388	0.968388	1.02246	1.00914	1.1532	1.0998	0.934215	0.908685	0.79661	1.30178	1.29876	1.24383	1.43407	1.28958	1.2722	1.2724	1.12199	0.819305	0.920756	0.822072	0.973385	0.92993	0.968702	0.893918	0.842021	0.798893	1.25952	0.497796	0.836943	0.986845	0.965206	0.909687
15.75	1.09247	1.0036	0.984352	0.938046	0.927854	0.966043	0.975772	1.03157	0.969458	0.941501	2.07042	1.92258	1.40646	1.53941	0.950553	1.02869	1.04708	1.01872	0.935411	1.01468	0.997714	1.02273	1.0942	0.925228	0.861538	0.772569	1.32199	1.27593	1.26602	1.35347	1.304	1.29929	1.3679	1.12927	0.800857	0.912243	0.845787	0.972987	0.92187	0.956234	0.890166	0.861184	0.776868	1.28208	0.476222	0.808101	0.94086	0.957143	0.895156
16.5	1.07005	0.953884	0.943022	0.941556	0.905647	0.93909	0.961275	1.03109	0.967095	0.930089	1.68075	1.49194	1.29402	1.37537	0.884673	0.979242	0.928751	0.970091	0.956106	1.03175	0.941333	0.995791	1.18992	0.951816	0.855335	0.812117	1.2394	1.14493	1.22337	1.30545	1.19537	1.22247	1.24485	1.07302	0.809422	0.847021	0.77398	0.954979	0.891779	0.935254	0.858716	0.802897	0.736854	1.19974	0.458322	0.77551	0.86868	0.8844	0.848335
17.25	1.08618	1.06231	0.940301	1.05594	0.903788	0.935455	0.968126	1.03043	0.98416	0.919071	2.05634	1.75645	1.21195	1.35123	0.933672	1.03243	0.974262	0.977854	0.909939	1.04792	0.934476	1.31313	1.66853	1.05205	1.03127	0.837601	1.18368	1.0981	1.1987	1.27553	1.22736	1.23956	1.25747	1.09023	0.844342	0.845018	0.793058	0.936176	0.890059	0.892949	0.864863	0.866089	0.75565	1.1654	0.476757	0.795294	0.908259	0.914636	0.896973
18	1.1321	1.07702	0.972787	0.921644	0.951974	0.989804	1.00685	1.07495	0.995187	1.00079	2.05399	1.94194	1.30016	1.41453	0.915895	0.9889	1.00973	0.984247	0.941096	1.09134	0.939429	1.25337	1.17159	1.02247	0.945161	0.894098	1.30202	1.19443	1.22586	1.3186	1.24431	1.29307	1.2682	1.10523	0.805633	0.896345	0.838103	0.975636	0.900376	0.915219	0.893359	0.867686	0.789553	1.21152	0.475755	0.81945	0.902883	0.931727	0.902825
18.75	1.10645	1.03729	1.00493	0.990259	0.966318	0.967462	1.03972	1.09627	1.01899	1.01613	6.34038	2.66935	1.39548	1.44409	0.933971	1.02407	1.08475	1.07146	0.999318	1.08895	0.953905	1.21465	1.2276	1.00936	0.919851	0.932324	1.28945	1.31091	1.24402	1.33975	1.24874	1.31905	1.29112	1.07699	0.87185	0.910491	0.848172	1.01894	0.93208	0.994067	0.900383	0.896886	0.785517	1.26642	0.492319	0.836318	0.953329	0.95688	0.949243
19.5	3.52227	4.57596	1.21226	1.0308	3.44318	4.65901	2.09949	1.80416	1.3602	2.44465	12.2019	3.50161	1.39774	1.44039	0.980729	1.06026	1.17483	1.24566	3.40277	1.2968	1.2499	1.17508	1.23014	5.37062	1.19901	0.928357	1.44329	1.46503	1.28571	1.40111	4.50759	3.23246	2.16029	1.17141	0.903476	0.949049	0.888712	1.0572	3.63729	1.49776	3.76149	1.76765	1.20249	1.27116	1.85386	1.55539	1.36616	2.09404	1.42795
20.25	3.68863	1.09092	2.02772	1.25498	2.03926	1.56814	1.58723	6.971	2.12322	4.71878	16.6737	4.44677	2.27141	5.59187	2.54586	2.82932	1.23854	3.18333	2.91676	4.08625	1.39505	1.15488	1.23422	1.62352	0.989826	1.02693	4.43294	6.22318	2.91643	4.32107	5.14542	3.86723	1.81573	1.34392	1.25004	1.13583	0.956412	3.79555	1.23632	1.71169	2.64998	1.92187	3.03137	3.88202	0.674259	2.51926	1.75841	1.24794	3.37286
21	3.5255	1.01439	1.9335	1.2799	5.78526	5.59181	5.51852	1.10861	0.972609	0.938877	8.36385	9.46452	5.89305	2.12537	1.6092	1.64235	1.12147	1.02078	1.04981	1.10003	0.974857	6.06061	3.00611	1.75971	4.14715	0.996514	1.36612	1.51274	1.31823	3.33803	2.50038	3.13721	1.94573	1.24178	1.05732	0.917001	0.942104	0.947696	3.74197	1.09149	1.44716	3.40972	1.35989	1.42592	2.40903	2.24271	4.00423	1.20123	3.00404
21.75	3.1235	1.0592	1.91649	1.20327	4.67625	4.92703	2.10992	1.03373	0.981535	1.04132	9.50235	3.22742	2.17124	1.60468	3.23962	2.8606	1.08443	1.06279	1.0937	1.16412	1.19086	1.7803	2.07688	1.32455	0.948883	1.05481	3.00099	4.66212	3.09007	3.71437	2.12418	1.58259	1.39798	1.50121	1.01845	1.0865	0.962507	4.39989	1.04836	1.53104	0.949074	1.21033	1.25946	4.27173	2.53206	2.25573	4.28083	1.34943	3.19405
22.5	2.20998	1.06656	1.71375	1.06417	0.866599	0.940598	0.923245	1.00282	0.988011	1.08709	1.73474	1.89194	1.37221	1.47709	0.933373	1.03921	1.03829	1.0032	1.0373	1.13327	0.901333	0.953704	1.11354	1.14068	0.81067	1.00288	1.26652	1.34707	1.17958	1.14939	1.14302	1.25155	1.2032	1.0503	0.814858	0.865423	0.911765	0.912076	0.928103	0.868874	0.870849	0.845671	0.793012	1.19572	0.433209	0.797064	0.91844	0.902366	0.814632
23.25	1.78786	1.07604	1.42061	0.927589	0.881687	0.96161	0.941714	1.00036	0.943205	1.12815	1.53521	1.85484	1.44071	1.42734	0.933373	0.959204	0.956058	1.07329	1.01979	1.13178	0.981714	1.22475	1.12016	1.08738	0.827295	1.0101	1.29438	1.39004	1.16944	1.20884	1.1845	1.2833	1.23896	1.09398	0.831165	0.844517	0.828431	0.87553	0.881354	0.891917	0.880188	0.884795	0.768335	1.19141	0.448571	0.778842	0.9062	0.834356	0.813219
24	1.45376	1.11742	1.28259	0.898224	0.871965	0.949198	0.941019	0.998922	0.958257	1.11424	1.98357	1.95806	1.37512	1.41847	0.972214	1.01845	1.07878	0.98516	0.983398	1.04432	0.792	1.27104	1.14766	1.12595	0.872457	1.06119	1.23743	1.33699	1.09084	1.22237	1.17615	1.24067	1.24253	1.04214	0.901828	0.834752	0.854134	0.874735	0.867598	0.850129	0.897749	0.930421	0.79797	1.16928	0.463599	0.809871	0.926218	0.818755	0.791019
24.75	1.27143	1.07261	1.17714	0.871723	0.885459	0.992109	0.956409	1.03601	0.952656	1.14586	2.15493	2.19355	1.5454	1.47857	0.989095	1.00332	0.972379	0.956621	0.989311	1.08745	0.806476	1.04545	1.27749	1.15441	0.890074	1.15939	1.31336	1.39212	1.1528	1.22504	1.23925	1.31838	1.26609	1.13457	0.972822	0.887832	0.986354	0.834481	0.849221	0.842132	0.910999	0.952777	0.847325	1.23868	0.485439	0.857455	0.986388	0.872918	0.80777
25.5	4.95392	7.13688	5.50285	4.35468	6.60086	5.87756	7.05392	8.53481	7.05049	8.13444	14.0211	4.65484	1.69047	1.58202	1.21497	1.4662	4.47144	3.9847	5.69843	5.43606	2.34895	9.48148	8.19348	9.14979	6.73524	8.17286	1.45488	1.62241	1.62402	3.8064	2.62949	2.6421	5.26231	5.14847	2.52841	4.30709	3.93866	6.47828	4.53702	5.87807	4.72126	5.86335	4.67182	2.26987	1.73644	5.75958	5.18154	3.71621	5.23703
26.25	4.98955	6.48389	5.25648	4.06002	6.22063	6.45926	6.75206	7.86023	5.53391	9.21786	21.6455	21.1984	9.22294	7.37266	4.68166	5.90197	5.41777	6.73425	6.00705	6.84636	3.98019	8.64226	8.10336	8.34515	6.29429	7.74516	8.99704	9.32128	6.38191	8.12157	9.45561	7.53663	8.18679	6.49327	2.55197	4.68553	4.44436	7.15784	4.93799	5.79398	4.21089	8.18935	6.15083	7.18149	3.84351	8.00364	8.14825	5.04251	5.8779
27	3.96175	4.69583	4.73229	3.76816	5.41949	5.79129	6.16314	6.71861	5.51308	6.17747	16.6878	14.271	7.03651	6.68424	4.3905	5.63529	4.60389	5.86712	5.41824	6.1749	3.83581	7.55471	6.51629	5.82412	5.21092	6.22815	7.04684	7.35477	4.93689	6.90244	8.75063	6.77909	6.51052	5.22744	2.42464	4.5507	3.11698	6.06435	4.35669	5.93302	4.68566	5.79183	4.98351	6.14312	3.23724	5.77541	6.17319	3.61709	4.87528
27.75	1.59708	1.1933	1.38473	1.15714	1.05833	1.19789	1.35677	1.1291	1.10624	1.17917	5.79108	4.49839	2.32472	3.44877	1.2429	1.65475	1.41055	1.85388	1.36138	1.44085	1.06095	1.7601	1.52546	1.20372	1.15484	1.95901	2.38708	2.03823	1.61331	1.55145	1.67185	1.61212	1.53976	1.31944	0.950585	1.0512	0.969793	1.23795	1.1093	1.70817	1.35792	1.20475	0.964829	1.53442	0.59117	0.983965	1.31766	0.972393	1.13269
28.5	1.14962	1.22731	1.31159	0.991548	1.04436	1.17714	1.2394	1.09975	1.10291	1.34614	2.70423	2.58226	1.70178	1.71478	1.16448	1.25847	1.31607	1.22397	1.23311	1.31027	1.16229	1.56566	1.41141	1.33779	1.08561	1.59034	1.66519	1.72318	1.43182	1.51353	1.5497	1.5655	1.52146	1.33377	1.02635	1.00989	1.06306	1.21001	1.08866	1.27721	1.15238	1.16539	0.955374	1.4903	0.597983	0.95304	1.159	0.968624	0.989506
29.25	1.14716	1.29632	1.35479	0.938189	1.04468	1.14611	1.11459	1.09717	1.08847	1.34273	2.62441	2.75161	1.68885	1.65345	1.14715	1.21695	1.28845	1.22511	1.18945	1.34262	1.03048	1.6835	1.60336	1.33928	1.08089	1.51989	1.56558	1.62833	1.35188	1.43236	1.46485	1.54996	1.4411	1.3298	0.929995	0.964822	1.06863	1.14685	1.0503	1.09338	1.06793	1.15239	0.940268	1.49519	0.572869	0.993232	1.20396	0.963365	0.997175
30	1.0831	1.23303	1.19576	0.903452	0.985921	1.0571	1.0279	1.03834	1.05863	1.39586	3.15258	2.93871	1.69532	1.65714	1.11324	1.12224	1.21783	1.17192	1.21719	1.27433	1.02857	1.49158	1.50866	1.31681	1.04864	1.3605	1.51824	1.71014	1.26889	1.35137	1.42893	1.46825	1.41481	1.2837	0.95915	0.939284	1.05379	1.16393	0.984417	1.01445	1.01237	1.15684	0.92643	1.47004	0.555437	1.01708	1.21059	0.916039	0.947326
30.75	1.06436	1.13312	1.16302	1.00136	0.967646	1.0657	1.06633	1.05146	1.04419	1.10087	2.66197	2.12581	1.45654	1.49409	0.999851	1.09269	1.12367	1.20639	1.12577	1.20186	1.05333	1.76431	1.30703	1.16477	1.05658	1.04339	1.3925	1.4102	1.23121	1.363	1.28743	1.49756	1.34392	1.22546	0.786032	0.895218	0.91362	1.04979	1.00494	1.03104	0.904853	0.986769	0.837638	1.27231	0.489581	0.843607	0.976436	0.900613	0.901211
31.5	1.1169	1.22126	1.24994	1.03646	0.971205	1.07261	1.09115	1.04948	1.07228	1.20003	2.90376	2.72258	1.57738	1.53695	1.05124	1.08822	1.20653	1.18607	1.12872	1.21923	0.985524	1.72727	1.64206	1.28211	1.11017	1.16468	1.36415	1.56402	1.28132	1.28792	1.36634	1.50777	1.38978	1.26075	0.846813	0.924011	0.93548	1.0584	0.961634	0.968014	0.934068	1.03353	0.881227	1.33238	0.510419	0.879321	1.04118	0.87397	0.864581
32.25	3.09063	1.62551	1.81393	1.87394	6.1445	6.02367	3.16374	6.24982	6.35801	5.17668	16.5188	20.7032	3.89144	6.97857	2.317	3.63875	1.99561	1.89338	5.08665	3.89518	1.93905	3.4638	3.95519	8.15179	2.86377	1.96815	3.49852	3.90871	4.04131	4.36014	8.32511	3.66541	3.4024	2.20185	1.89425	1.76778	3.6986	5.46531	5.18549	2.50318	4.27562	6.22528	4.37973	5.58054	3.10667	3.06237	6.2464	4.16004	4.87386
33	2.48817	7.06034	1.83187	3.82968	2.09329	4.89033	2.3244	2.35232	6.69064	6.58959	21.7324	22.8194	2.88304	5.51773	1.47236	2.57691	1.69492	1.70708	2.18081	3.06469	1.55162	3.44444	4.00764	8.72825	2.97593	7.48996	3.19847	2.47718	4.67623	4.50896	7.12241	3.03086	2.94173	2.35694	1.81782	1.72409	3.82287	4.78019	4.14336	2.05013	1.67425	6.55504	2.35828	5.1368	2.76823	2.96991	5.50263	1.4057	3.74985
33.75	2.32427	5.81096	1.6646	3.66201	5.98146	6.39596	6.77867	6.32411	5.21799	1.82083	18.7066	6.60806	2.52213	6.32192	1.41589	3.38821	1.58945	1.65205	4.86059	5.85594	2.16914	9.89394	3.81772	7.55798	6.95682	4.59334	2.74038	2.25548	3.97342	4.25972	8.00341	2.96448	2.76104	1.90117	1.46384	1.40185	2.64865	5.23186	4.08297	2.27644	1.80659	5.26098	2.11462	5.07429	2.74112	2.69742	4.71391	1.46564	3.31635
34.5	1.84132	5.42175	4.19126	3.09669	5.26478	5.52744	5.9302	5.31057	4.47895	1.80063	17.3333	5.79194	5.71502	5.92365	3.32148	3.69742	5.23101	1.5258	4.30475	6.04073	3.61905	7.13721	2.93534	5.13419	5.48685	4.5336	4.23644	6.89982	3.74603	3.89558	7.24987	7.02198	3.52756	1.90558	1.53714	1.3474	2.51113	4.04846	4.22278	1.97034	3.52035	5.5385	4.12973	5.04986	2.68842	4.7955	5.35976	2.07791	3.11473
35.25	1.28003	3.35094	3.68135	2.03982	4.1963	2.82933	4.28369	4.80536	2.42128	1.49607	9.11268	3.62581	5.02746	4.58079	2.16731	2.15194	3.64218	1.03082	1.50694	3.44444	1.23657	1.47643	1.67006	2.35551	4.534	4.58697	1.7818	1.69798	2.72385	2.53868	3.52896	1.74312	1.57026	1.1156	0.774996	0.86317	1.031	2.14711	2.08415	1.15701	0.983557	2.13357	1.23905	3.61776	1.33329	4.41337	4.14859	0.979842	1.50777
																																								1.39407	0.454903	1.0427	1.02726	0.677638	0.95961	0.763745	1.16341	1.20359	0.542149
[truncated: 448 more columns]

## Sheet: Fig 3-S1B
Higd1c+/+
Peak F/F0
O2, 50	O2, 25
3.16549	4.05376
2.51368	4.54567
3.85874	3.8346
3.83703	4.48861
2.57671	4.37469
2.33009	2.88172
5.64322	3.60738
5.38859	4.68314
4.5883	3.23546
3.49122	3.56317
2.32061	3.20302
5.27912	2.59273
2.4676	2.68718
2.51378	2.29453
1.92451	3.38926
1.94377	3.16752
1.50494	4.60078
1.35824	4.17874
5.97217	6.06344
1.45194	5.32564
4.01398	4.82881
3.49453	3.34426
1.40509	1.50552
1.15419	1.29123
1.16779	2.71506
2.41577	3.50766
1.1907	1.36852
2.84381	4.01615
1.155	1.08657
4.35538	5.41557
2.82838	3.40472
1.10002	1.17874
3.16346	3.34711
1.04171	4.5218
2.22296	2.08317
1.3336	1.30134
3.24328	6.27688
1.96089	5.83846
3.74916	5.61455
5.00219	6.7457
2.15311	2.16311
1.42236	5.09756
2.64086	9.22168
1.53788	5.44973
1.3889	4.46296
1.39866	3.916
1.36877	3.49295
2.03815	2.79611
1.13024	1.26171
1.14568	3.20695
2.52987	3.61052
2.97028	3.97032
1.60299	1.43721
1.18673	5.40541
1.21698	2.37993
5.32579	5.56063
1.164	4.53634
1.00743	1.31078
1.07132	3.51343
1.07844	5.1669
1.18989	2.50618
1.42203	3.21956
1.23426	4.10295
1.38063	3.07318
1.21112	1.6803
1.21854	1.36025
1.17401	1.52727
1.18523	1.28887
1.07989	1.19015
4.4539	4.58618
3.71658	4.11925
1.57332	1.82428
1.31313	4.28946
3.60714	4.04451
1.61685	3.95189
1.25587	3.48234
5.21314	5.30525
2.17283	3.13356
1.20071	4.62212
1.18953	2.25082
1.81592	3.80024
1.21322	2.10925
4.67756	6.14479
2.08006	3.88387
2.15999	3.42723
1.16415	3.60363
2.11796	2.43968
1.35089	6.9994
1.16187	2.62344
2.55607	2.68334
1.26993	1.18093
1.1981	1.1946
1.52287	4.47735
7.00043	0.790792
5.96504	3.08905
7.37053	0.902301
1.22788	1.04796
2.49238	2.68818
0.985299	1.33059
1.21414	5.28953
4.05841	5.49752
3.41031	3.73793
1.30595	1.80417
2.18273	4.62813
3.64474	5.26053
2.49096	3.90953
3.53092	5.72067
6.17577	6.35448
4.29024	3.40457
5.47293	3.66063
2.57572	3.05656
1.10166	1.51934
1.28239	5.03019
6.17443	4.07272
4.0906	2.85908
1.23389	1.18652
1.14168	1.20489
1.40841	3.31844
0.893425	2.57164
3.7513	3.90156
1.54501	1.33307
1.21383	1.25608
1.36727	1.9536
1.15132	3.95386
2.48956	3.44371
4.27685	4.7168
1.23934	3.10176
1.32291	2.42986
1.89604	2.46988
1.54669	1.95373
1.28797	2.69876
1.8079	2.29375
2.7083	4.19275
5.92136	4.84478
4.58471	5.01848
1.20509	1.15275
2.20322	3.56474
1.17841	4.52455
1.60456	3.0629
1.16068	1.03555
1.20276	1.13763
1.20409	2.88607
1.14179	1.05216
1.1424	1.09578
1.21225	1.10092
1.20841	1.23541
4.39893	5.20661
2.60126	4.52869
2.37486	4.16887
3.09535	4.02836
4.65829	1.90238
2.41055	3.2555
1.16428	1.51741
1.22454	3.19475
1.31133	1.19834
1.19423	1.58585
1.19109	2.89076
1.45041	3.3539
3.22411	2.37603
1.75808	1.67995
1.37312	1.34739
1.25592	2.8593
1.11728	2.19935
1.13314	1.20271
1.21711	1.91292
1.17982	3.28959
1.3276	2.19385
1.17001	3.28279
1.26663	2.89314
1.36709	1.05874
1.2745	2.42429
1.63576	2.82583
1.75803	2.59444
1.17072	4.42201
3.64202	3.15751
1.41605	2.45407
2.1827	2.05601
1.36893	2.30374
1.2374	1.05769
1.09413	0.973649
3.84109	3.95799
1.47168	1.36504
1.13824	2.08538
1.33481	1.29815
1.26653	2.53699
1.9185	2.04558
2.71191	2.39945
2.31709	2.27145
1.39288	2.52113
2.7624	2.90662
3.39875	3.25813
2.03939	2.30528
1.27864	2.69623
3.83234	2.46393
1.38206	1.18845
1.34062	1.25587
1.17408	2.70121
1.23664	1.54078
1.10738	1.674
1.18102	1.20234
1.15088	3.38428
2.5149	1.37281
2.17726	3.65824
1.40024	3.04017
1.31736	3.21889
1.30704	4.48137
1.16797	5.02204
1.19748	1.73362
1.41586	1.68627
2.79991	8.25251
1.23559	2.25849
1.30058	2.30176
1.13795	5.02321
1.17307	2.88807
1.08794	1.19536
5.64884	4.29971
1.38181	2.87214
5.03573	4.89448
4.98194	5.8862
4.355	4.38873
2.59705	4.83434
4.87553	3.48185
5.16762	5.11238
4.94943	3.78125
5.0655	3.46177
1.62141	1.80225
0.730426	1.12974
1.38148	3.85471
3.8394	4.1101
3.3394	3.05976
1.20326	2.5425
1.19979	3.89423
1.39455	3.54057
1.39475	3.26857
3.19264	4.24188
4.30072	4.17791
1.37787	4.11205
1.2655	5.05475
3.31636	6.41398
3.43635	4.76249
1.20008	1.77166
1.22515	0.993578
2.8533	3.01185
1.50394	3.60014
1.25865	4.36633
2.83933	3.29974
3.8587	3.57568
3.04211	3.68412
1.03757	5.46649
2.72302	3.32488
1.21657	1.13202
5.84219	2.20184
4.68712	2.32623
1.165	1.69876
1.18617	3.84729
1.87599	3.23841
1.08026	4.72425
1.18949	3.67092
1.21151	2.24341
2.30792	2.94063
4.15115	2.52268
2.98684	4.61186
4.70602	4.69949
3.49166	6.32227
6.51786	5.68549
5.53651	4.41776
3.18662	5.02464
2.09399	3.80445
3.93217	3.43173
1.81404	3.44357
1.89917	3.04419
2.95828	4.31286
4.29516	4.66387
1.47954	1.49102
2.92596	5.05804
1.6785	2.21894
2.79337	5.22744
3.1807	3.95272
2.06191	5.05979
4.61413	3.85606
4.86197	4.56445
4.59387	4.48758
5.27382	6.29092
5.36443	5.42578
4.82542	0.530613
5.69094	5.06588
4.01588	2.18457
2.99619	2.1918
1.03754	5.33837
3.5558	4.9229
4.04729	4.03802
1.28499	3.52118
1.02513	5.02736
2.22287	4.28976
1.04424	6.42027
4.6477	4.54112
2.81701	3.2429
5.23186	3.17942
1.16001	1.88808
1.19886	1.17035
1.12297	2.47172
1.22717	3.53491
1.13595	3.87604
1.12755	1.04071
1.6404	1.31993
1.14126	4.20123
1.20075	3.41614
1.1806	0.93889
1.34732	1.67311
1.18247	3.3949
1.14409	5.31803
1.04928	3.92821

## Sheet: Fig 3-S1C
Higd1c-/-
Peak F/F0
O2, 50	O2, 25
1.24825	0.967304
1.15873	0.967237
1.53339	3.22316
2.19555	1.93301
6.15122	6.09259
1.33274	1.15821
1.16648	0.950791
1.19744	5.51234
1.24882	1.00711
1.25017	0.917959
1.06112	0.928524
1.11932	0.845477
1.16464	0.827542
1.55276	0.986893
1.59375	0.957775
1.4791	0.933061
1.39395	1.01362
1.54138	1.02798
1.49855	1.00102
1.7067	0.877913
1.28473	0.972862
1.48137	0.979283
1.26488	1.01709
1.40707	1.12368
1.51077	1.02809
1.41486	1.0508
1.45176	1.04461
1.51391	0.981744
1.52131	1.02715
0.642388	0.945435
1.46706	0.993051
5.07802	4.06307
1.43158	6.04235
2.1526	5.70637
1.41044	1.05554
1.30179	1.05992
1.96938	1.57752
1.46855	6.37874
5.6817	4.52038
0.933693	1.93667
1.06362	2.69735
1.27265	3.38674
1.34852	1.69946
1.12265	1.08569
5.13652	4.49103
0.867153	2.86049
2.11657	1.51153
1.42133	1.04082
1.46282	3.68688
1.35616	4.22033
1.50332	3.82898
1.39618	2.07132
1.25434	0.872228
1.26707	0.928211
0.935181	1.02531
1.06457	0.928154
1.01047	1.00854
0.833558	0.967896
1.53314	1.00551
1.28663	0.981057
0.909295	1.01723
1.04228	1.01972
1.34186	4.20904
1.21839	0.998258
1.25109	0.984385
0.578183	0.961205
1.34053	0.991167
1.37998	0.998006
1.12057	1.23279
1.33349	3.22903
1.24106	1.20703
0.674686	1.03529
0.533579	1.25757
1.19194	1.00982
1.37793	1.04416
1.38185	0.99145
1.3094	0.954524
1.24855	0.928283
1.21179	0.95662
1.21819	0.948707
0.960407	1.17717
0.878483	0.940245
1.04632	3.0117
1.16444	1.61347
1.25227	0.951653
0.973536	0.972203
1.17627	0.935787
1.3263	1.03801
1.14055	1.10356
1.31989	1.15254
1.18132	0.713102
1.19013	1.00086
1.2549	1.82722
1.17791	1.31086
1.09959	0.976116
1.08447	0.986672
1.7312	1.1471
2.03187	3.61741
1.83301	3.66516
4.70913	3.94375
3.98338	3.97199
2.09383	2.04667
2.57173	4.09684
3.87973	3.26851
2.10835	1.96682
3.29103	3.24394
2.2815	3.7774
4.21152	3.01903
1.74286	1.20587
1.44198	2.52821
1.6085	3.01123
1.95142	0.986054
2.42518	2.39967
1.45926	2.9176
1.68196	2.42274
1.52893	1.02848
1.40738	2.06803
1.84535	3.37657
3.4449	4.07575
3.91319	3.5875
2.16524	4.23379
3.16034	1.2042
2.3872	1.38003
3.40366	1.73703
3.72705	1.31848
1.74927	1.32349
2.17185	4.02106
5.20348	3.32687
2.04697	2.39529
1.52001	2.54089
1.48764	3.92426
1.89656	1.71888
1.75242	1.48936
1.48825	1.63692
5.25626	4.01411
1.93324	1.33184
1.53457	1.68002
1.54338	1.30569
1.49641	3.52691
1.45452	2.93303
1.49617	3.41482
1.46558	1.26862
1.5561	1.07672
1.53397	1.96802
1.38017	3.05904
1.97278	1.93629
2.19628	1.99938
2.92519	3.44343
1.81673	4.4102
1.25108	3.37392
3.31248	2.3845
1.94666	2.75557
1.42719	1.17333
1.50368	1.39599
1.34138	1.22861
1.37681	2.18799
1.39001	2.19548
1.40938	2.59919
1.50012	2.37755
1.92679	3.22675
1.63945	2.0312
1.47451	2.02956
1.7818	2.64678
1.52665	2.53291
1.30333	1.06444
1.83102	1.03983
1.4056	1.96219
1.31047	1.08141
1.50331	2.76444
1.42695	2.27839
1.41501	0.954233
1.54657	1.01735
1.64376	1.12131
2.31628	2.57902
1.31685	0.989438
1.4086	1.04528
1.33444	2.83547
1.5715	1.44122
1.3456	1.13037
1.44579	1.03337
1.36464	1.11971
1.37131	2.4656
1.3564	1.0761
1.38492	1.00944
1.31564	1.03122
1.27087	2.28406
1.43724	3.81624
1.64602	3.35021
5.81613	1.81968
1.46416	1.09761
0.919873	2.08385
1.40084	0.991038
1.44934	2.30939
1.36333	3.22324
1.46761	1.58362
1.46475	1.45166
1.43536	1.70965
1.01972	1.10547
1.95276	1.00448
1.33193	1.03245
1.31888	1.90686
1.34718	0.979709
1.39065	1.47414
1.89545	2.95327
1.86651	0.510981
1.34609	0.884529
1.32626	1.01554
1.28091	2.57531
1.3075	1.55544
4.36092	5.02938
1.44304	0.975387
5.80377	0.834487
2.35965	0.869303
1.3116	1.62554

## Sheet: Fig 3-S1D
Peak F/F0	Fraction of Cells
	Higd1c+/+	Higd1c-/-
0.01	0.987179	0.940367
0.02	0.987179	0.931193
0.03	0.983974	0.931193
0.04	0.977564	0.931193
0.05	0.967949	0.922018
0.06	0.967949	0.922018
0.07	0.967949	0.908257
0.08	0.958333	0.908257
0.09	0.951923	0.90367
0.1	0.948718	0.899083
0.11	0.939103	0.899083
0.12	0.935897	0.894495
0.13	0.929487	0.885321
0.14	0.913462	0.885321
0.15	0.894231	0.880734
0.16	0.88141	0.876147
0.17	0.852564	0.862385
0.18	0.830128	0.853211
0.19	0.801282	0.848624
0.2	0.778846	0.834862
0.21	0.753205	0.834862
0.22	0.721154	0.821101
0.23	0.708333	0.821101
0.24	0.689103	0.821101
0.25	0.689103	0.798165
0.26	0.679487	0.770642
0.27	0.666667	0.761468
0.28	0.660256	0.747706
0.29	0.650641	0.733945
0.3	0.650641	0.733945
0.31	0.641026	0.715596
0.32	0.63141	0.683486
0.33	0.625	0.674312
0.34	0.61859	0.655963
0.35	0.612179	0.623853
0.36	0.605769	0.614679
0.37	0.592949	0.605505
0.38	0.586538	0.587156
0.39	0.570513	0.573394
0.4	0.557692	0.555046
0.41	0.548077	0.527523
0.42	0.541667	0.513761
0.43	0.535256	0.5
0.44	0.535256	0.486239
0.45	0.535256	0.46789
0.46	0.528846	0.454128
0.47	0.528846	0.422018
0.48	0.522436	0.412844
0.49	0.522436	0.399083
0.5	0.522436	0.385321
0.51	0.516026	0.366972
0.52	0.516026	0.357798
0.53	0.512821	0.33945
0.54	0.509615	0.321101
0.55	0.503205	0.307339
0.56	0.503205	0.298165
0.57	0.503205	0.298165
0.58	0.5	0.293578
0.59	0.5	0.293578
0.6	0.5	0.288991
0.61	0.49359	0.284404
0.62	0.490385	0.284404
0.63	0.487179	0.284404
0.64	0.483974	0.279817
0.65	0.480769	0.270642
0.66	0.480769	0.270642
0.67	0.480769	0.270642
0.68	0.477564	0.270642
0.69	0.477564	0.266055
0.7	0.477564	0.266055
0.71	0.477564	0.261468
0.72	0.477564	0.261468
0.73	0.477564	0.261468
0.74	0.477564	0.256881
0.75	0.477564	0.247706
0.76	0.471154	0.238532
0.77	0.471154	0.238532
0.78	0.471154	0.238532
0.79	0.471154	0.233945
0.8	0.471154	0.233945
0.81	0.467949	0.233945
0.82	0.461538	0.229358
0.83	0.461538	0.229358
0.84	0.461538	0.220183
0.85	0.461538	0.215596
0.86	0.461538	0.215596
0.87	0.461538	0.211009
0.88	0.458333	0.211009
0.89	0.458333	0.211009
0.9	0.451923	0.201835
0.91	0.451923	0.201835
0.92	0.448718	0.201835
0.93	0.445513	0.197248
0.94	0.445513	0.192661
0.95	0.442308	0.188073
0.96	0.442308	0.178899
0.97	0.439103	0.174312
0.98	0.439103	0.169725
0.99	0.439103	0.169725
1	0.439103	0.169725
1.01	0.439103	0.169725
1.02	0.439103	0.169725
1.03	0.439103	0.169725
1.04	0.432692	0.165138
1.05	0.432692	0.16055
1.06	0.432692	0.16055
1.07	0.429487	0.16055
1.08	0.429487	0.16055
1.09	0.426282	0.16055
1.1	0.423077	0.155963
1.11	0.423077	0.151376
1.12	0.419872	0.146789
1.13	0.419872	0.146789
1.14	0.419872	0.146789
1.15	0.419872	0.146789
1.16	0.413462	0.142202
1.17	0.413462	0.137615
1.18	0.407051	0.133028
1.19	0.400641	0.133028
1.2	0.400641	0.123853
1.21	0.397436	0.123853
1.22	0.397436	0.123853
1.23	0.391026	0.123853
1.24	0.391026	0.123853
1.25	0.391026	0.123853
1.26	0.391026	0.123853
1.27	0.391026	0.123853
1.28	0.391026	0.123853
1.29	0.391026	0.119266
1.3	0.391026	0.119266
1.31	0.387821	0.119266
1.32	0.384615	0.114679
1.33	0.38141	0.114679
1.34	0.378205	0.114679
1.35	0.378205	0.114679
1.36	0.378205	0.110092
1.37	0.378205	0.110092
1.38	0.375	0.110092
1.39	0.375	0.105505
1.4	0.375	0.105505
1.41	0.375	0.105505
1.42	0.36859	0.105505
1.43	0.36859	0.100917
1.44	0.36859	0.100917
1.45	0.36859	0.100917
1.46	0.36859	0.100917
1.47	0.365385	0.100917
1.48	0.365385	0.100917
1.49	0.362179	0.100917
1.5	0.355769	0.100917
1.51	0.355769	0.100917
1.52	0.346154	0.100917
1.53	0.342949	0.100917
1.54	0.342949	0.100917
1.55	0.342949	0.100917
1.56	0.339744	0.100917
1.57	0.339744	0.100917
1.58	0.333333	0.0963303
1.59	0.333333	0.0963303
1.6	0.330128	0.0963303
1.61	0.326923	0.0963303
1.62	0.326923	0.0963303
1.63	0.326923	0.0963303
1.64	0.326923	0.0963303
1.65	0.323718	0.0963303
1.66	0.323718	0.0963303
1.67	0.323718	0.0963303
1.68	0.323718	0.0963303
1.69	0.323718	0.0963303
1.7	0.323718	0.0963303
1.71	0.320513	0.0963303
1.72	0.317308	0.0963303
1.73	0.314103	0.0963303
1.74	0.314103	0.0963303
1.75	0.314103	0.0963303
1.76	0.314103	0.0963303
1.77	0.310897	0.0963303
1.78	0.310897	0.0963303
1.79	0.310897	0.0963303
1.8	0.304487	0.0963303
1.81	0.304487	0.0963303
1.82	0.301282	0.0963303
1.83	0.298077	0.0963303
1.84	0.294872	0.0963303
1.85	0.291667	0.0963303
1.86	0.288462	0.0963303
1.87	0.288462	0.0963303
1.88	0.288462	0.0963303
1.89	0.288462	0.0963303
1.9	0.288462	0.0963303
1.91	0.288462	0.0963303
1.92	0.288462	0.0963303
1.93	0.285256	0.0917431
1.94	0.285256	0.0917431
1.95	0.285256	0.0917431
1.96	0.282051	0.0917431
1.97	0.282051	0.0917431
1.98	0.278846	0.0917431
1.99	0.275641	0.0917431
2	0.272436	0.0917431
2.01	0.272436	0.0917431
2.02	0.272436	0.0917431
2.03	0.272436	0.0917431
2.04	0.272436	0.0917431
2.05	0.269231	0.0917431
2.06	0.269231	0.0917431
2.07	0.269231	0.0917431
2.08	0.269231	0.0917431
2.09	0.269231	0.0917431
2.1	0.266026	0.0917431
2.11	0.266026	0.0917431
2.12	0.266026	0.0917431
2.13	0.266026	0.0917431
2.14	0.266026	0.0917431
2.15	0.266026	0.0917431
2.16	0.266026	0.0917431
2.17	0.259615	0.087156
2.18	0.259615	0.087156
2.19	0.253205	0.087156
2.2	0.25	0.087156
2.21	0.25	0.087156
2.22	0.25	0.087156
2.23	0.246795	0.087156
2.24	0.246795	0.087156
2.25	0.24359	0.087156
2.26	0.24359	0.087156
2.27	0.24359	0.087156
2.28	0.24359	0.087156
2.29	0.24359	0.087156
2.3	0.24359	0.0825688
2.31	0.24359	0.0825688
2.32	0.240385	0.0779817
2.33	0.240385	0.0779817
2.34	0.237179	0.0779817
2.35	0.237179	0.0779817
2.36	0.237179	0.0779817
2.37	0.237179	0.0779817
2.38	0.237179	0.0779817
2.39	0.237179	0.0779817
2.4	0.233974	0.0779817
2.41	0.233974	0.0733945
2.42	0.230769	0.0733945
2.43	0.230769	0.0733945
2.44	0.227564	0.0733945
2.45	0.227564	0.0688073
2.46	0.227564	0.0688073
2.47	0.227564	0.0688073
2.48	0.227564	0.0688073
2.49	0.227564	0.0688073
2.5	0.217949	0.0688073
2.51	0.217949	0.0688073
2.52	0.217949	0.0688073
2.53	0.217949	0.0688073
2.54	0.214744	0.0688073
2.55	0.214744	0.0688073
2.56	0.211538	0.0688073
2.57	0.211538	0.0688073
2.58	0.211538	0.0688073
2.59	0.211538	0.0688073
2.6	0.211538	0.0688073
2.61	0.208333	0.0688073
2.62	0.208333	0.0688073
2.63	0.208333	0.0688073
2.64	0.208333	0.0688073
2.65	0.201923	0.0688073
2.66	0.201923	0.0688073
2.67	0.201923	0.0688073
2.68	0.201923	0.0688073
2.69	0.201923	0.0688073
2.7	0.201923	0.0688073
2.71	0.201923	0.0688073
2.72	0.198718	0.0688073
2.73	0.198718	0.0642202
2.74	0.198718	0.0642202
2.75	0.195513	0.0642202
2.76	0.192308	0.0642202
2.77	0.192308	0.0642202
2.78	0.192308	0.0642202
2.79	0.192308	0.0642202
2.8	0.192308	0.0642202
2.81	0.192308	0.0642202
2.82	0.192308	0.0642202
2.83	0.192308	0.0642202
2.84	0.182692	0.0642202
2.85	0.179487	0.0642202
2.86	0.173077	0.0642202
2.87	0.173077	0.0642202
2.88	0.173077	0.059633
2.89	0.173077	0.059633
2.9	0.173077	0.059633
2.91	0.173077	0.059633
2.92	0.173077	0.0550459
2.93	0.173077	0.0550459
2.94	0.169872	0.0550459
2.95	0.169872	0.0550459
2.96	0.169872	0.0550459
2.97	0.169872	0.0550459
2.98	0.169872	0.0550459
2.99	0.169872	0.0504587
3	0.169872	0.0504587
3.01	0.169872	0.0504587
3.02	0.163462	0.0504587
3.03	0.163462	0.0504587
3.04	0.163462	0.0504587
3.05	0.160256	0.0504587
3.06	0.157051	0.0504587
3.07	0.157051	0.0504587
3.08	0.157051	0.0504587
3.09	0.157051	0.0504587
3.1	0.153846	0.0504587
3.11	0.153846	0.0504587
3.12	0.153846	0.0504587
3.13	0.153846	0.0504587
3.14	0.153846	0.0504587
3.15	0.153846	0.0504587
3.16	0.150641	0.0504587
3.17	0.150641	0.0504587
3.18	0.150641	0.0504587
3.19	0.150641	0.0504587
3.2	0.150641	0.0504587
3.21	0.150641	0.0504587
3.22	0.150641	0.0458716
3.23	0.150641	0.0458716
3.24	0.150641	0.0458716
3.25	0.150641	0.0458716
3.26	0.150641	0.0458716
3.27	0.150641	0.0458716
3.28	0.147436	0.0458716
3.29	0.147436	0.0458716
3.3	0.141026	0.0458716
3.31	0.137821	0.0458716
3.32	0.137821	0.0458716
3.33	0.137821	0.0458716
3.34	0.137821	0.0458716
3.35	0.137821	0.0458716
3.36	0.13141	0.0458716
3.37	0.13141	0.0412844
3.38	0.13141	0.0412844
3.39	0.13141	0.0412844
3.4	0.128205	0.0412844
3.41	0.128205	0.0412844
3.42	0.128205	0.0412844
3.43	0.128205	0.0412844
3.44	0.128205	0.0412844
3.45	0.128205	0.0412844
3.46	0.125	0.0412844
3.47	0.125	0.0412844
3.48	0.125	0.0412844
3.49	0.125	0.0412844
3.5	0.125	0.0412844
3.51	0.125	0.0412844
3.52	0.125	0.0412844
3.53	0.125	0.0412844
3.54	0.125	0.0412844
3.55	0.125	0.0412844
3.56	0.125	0.0412844
3.57	0.125	0.0412844
3.58	0.125	0.0412844
3.59	0.11859	0.0412844
3.6	0.115385	0.0412844
3.61	0.115385	0.0412844
3.62	0.112179	0.0412844
3.63	0.112179	0.0412844
3.64	0.112179	0.0412844
3.65	0.108974	0.0412844
3.66	0.105769	0.0412844
3.67	0.105769	0.0412844
3.68	0.102564	0.0412844
3.69	0.099359	0.0412844
3.7	0.099359	0.0412844
3.71	0.0961538	0.0366972
3.72	0.0961538	0.0366972
3.73	0.0961538	0.0366972
3.74	0.0961538	0.0366972
3.75	0.0961538	0.0366972
3.76	0.0961538	0.0366972
3.77	0.0961538	0.0366972
3.78	0.0961538	0.0366972
3.79	0.0961538	0.0366972
3.8	0.0961538	0.0366972
3.81	0.0961538	0.0366972
3.82	0.0961538	0.0366972
3.83	0.0929487	0.0366972
3.84	0.0929487	0.0366972
3.85	0.0929487	0.0366972
3.86	0.0929487	0.0366972
3.87	0.0897436	0.0366972
3.88	0.0865385	0.0366972
3.89	0.0865385	0.0366972
3.9	0.0865385	0.0366972
3.91	0.0865385	0.0366972
3.92	0.0865385	0.0366972
3.93	0.0865385	0.0366972
3.94	0.0865385	0.0366972
3.95	0.0833333	0.0366972
3.96	0.0833333	0.0366972
3.97	0.0833333	0.0366972
3.98	0.0833333	0.0366972
3.99	0.0801282	0.0366972
4	0.0801282	0.0366972
4.01	0.0769231	0.0366972
4.02	0.0769231	0.0366972
4.03	0.0769231	0.0366972
4.04	0.0737179	0.0366972
4.05	0.0737179	0.0366972
4.06	0.0737179	0.0366972
4.07	0.0705128	0.0366972
4.08	0.0705128	0.0321101
4.09	0.0705128	0.0321101
4.1	0.0705128	0.0321101
4.11	0.0705128	0.0321101
4.12	0.0705128	0.0321101
4.13	0.0705128	0.0321101
4.14	0.0705128	0.0275229
4.15	0.0705128	0.0275229
4.16	0.0705128	0.0275229
4.17	0.0673077	0.0275229
4.18	0.0673077	0.0275229
4.19	0.0673077	0.0275229
4.2	0.0673077	0.0275229
4.21	0.0673077	0.0229358
4.22	0.0641026	0.0229358
4.23	0.0641026	0.0229358
4.24	0.0608974	0.0229358
4.25	0.0608974	0.0229358
4.26	0.0608974	0.0183486
4.27	0.0608974	0.0183486
4.28	0.0544872	0.0183486
4.29	0.0544872	0.0183486
4.3	0.0544872	0.0183486
4.31	0.0544872	0.0183486
4.32	0.0544872	0.0183486
4.33	0.0512821	0.0183486
4.34	0.0512821	0.0183486
4.35	0.0512821	0.0183486
4.36	0.0512821	0.0183486
4.37	0.0480769	0.0183486
4.38	0.0480769	0.0183486
4.39	0.0448718	0.0183486
4.4	0.0448718	0.0183486
4.41	0.0448718	0.0183486
4.42	0.0448718	0.0183486
4.43	0.0448718	0.0183486
4.44	0.0448718	0.0183486
4.45	0.0448718	0.0183486
4.46	0.0448718	0.0183486
4.47	0.0448718	0.0183486
4.48	0.0416667	0.0183486
4.49	0.0416667	0.0183486
4.5	0.0416667	0.0183486
4.51	0.0416667	0.0183486
4.52	0.0416667	0.0183486
4.53	0.0416667	0.0183486
4.54	0.0384615	0.0183486
4.55	0.0384615	0.0183486
4.56	0.0384615	0.0183486
4.57	0.0384615	0.0183486
4.58	0.0384615	0.0183486
4.59	0.0384615	0.0183486
4.6	0.0384615	0.0183486
4.61	0.0384615	0.0183486
4.62	0.0384615	0.0183486
4.63	0.0384615	0.0183486
4.64	0.0384615	0.0183486
4.65	0.0320513	0.0183486
4.66	0.0320513	0.0183486
4.67	0.0320513	0.0183486
4.68	0.0320513	0.0183486
4.69	0.0320513	0.0137615
4.7	0.0288462	0.0137615
4.71	0.0288462	0.0137615
4.72	0.0288462	0.0137615
4.73	0.0288462	0.0137615
4.74	0.0288462	0.0137615
4.75	0.0288462	0.0137615
4.76	0.0288462	0.0137615
4.77	0.0288462	0.0137615
4.78	0.0288462	0.0137615
4.79	0.0288462	0.0137615
4.8	0.0288462	0.0137615
4.81	0.0288462	0.00917431
4.82	0.0288462	0.00458716
4.83	0.0288462	0.00458716
4.84	0.0288462	0.00458716
4.85	0.025641	0.00458716
4.86	0.025641	0.00458716
4.87	0.025641	0.00458716
4.88	0.025641	0.00458716
4.89	0.025641	0.00458716
4.9	0.025641	0.00458716
4.91	0.025641	0.00458716
4.92	0.025641	0.00458716
4.93	0.0224359	0.00458716
4.94	0.0224359	0.00458716
4.95	0.0224359	0.00458716
4.96	0.0224359	0.00458716
4.97	0.0192308	0.00458716
4.98	0.0160256	0.00458716
4.99	0.0160256	0.00458716
5	0.0160256	0.00458716
5.01	0.0160256	0.00458716
5.02	0.0160256	0.00458716
5.03	0.0160256	0.00458716
5.04	0.0160256	0.00458716
5.05	0.0160256	0.00458716
5.06	0.0160256	0.00458716
5.07	0.0160256	0.00458716
5.08	0.0160256	0.00458716
5.09	0.0160256	0.00458716
5.1	0.0160256	0.00458716
5.11	0.0160256	0.00458716
5.12	0.0160256	0.00458716
5.13	0.0160256	0.00458716
5.14	0.0160256	0.00458716
5.15	0.0160256	0.00458716
5.16	0.0160256	0
5.17	0.0160256	0
5.18	0.00961539	0
5.19	0.00961539	0
5.2	0.00961539	0
5.21	0.00961539	0
5.22	0.00961539	0
5.23	0.00961539	0
5.24	0.00961539	0
5.25	0.00961539	0
5.26	0.00961539	0
5.27	0.00961539	0
5.28	0.00961539	0
5.29	0.00961539	0
5.3	0.00961539	0
5.31	0.00961539	0
5.32	0.00961539	0
5.33	0.00961539	0
5.34	0.00961539	0
5.35	0.00961539	0
5.36	0.00961539	0
5.37	0.00961539	0
5.38	0.00961539	0
5.39	0.00961539	0
5.4	0.00961539	0
5.41	0.00961539	0
5.42	0.00961539	0
5.43	0.00961539	0
5.44	0.00961539	0
5.45	0.00961539	0
5.46	0.00961539	0
5.47	0.00961539	0
5.48	0.00961539	0
5.49	0.00961539	0
5.5	0.00961539	0
5.51	0.00961539	0
5.52	0.00641026	0
5.53	0.00641026	0
5.54	0.00641026	0
5.55	0.00641026	0
5.56	0.00641026	0
5.57	0.00641026	0
5.58	0.00641026	0
5.59	0.00641026	0
5.6	0.00641026	0
5.61	0.00641026	0
5.62	0.00641026	0
5.63	0.00641026	0
5.64	0.00641026	0
5.65	0.00641026	0
5.66	0.00641026	0
5.67	0.00641026	0
5.68	0.00641026	0
5.69	0.00641026	0
5.7	0.00641026	0
5.71	0.00641026	0
5.72	0.00641026	0
5.73	0.00641026	0
5.74	0.00641026	0
5.75	0.00641026	0
5.76	0.00641026	0
5.77	0.00641026	0
5.78	0.00641026	0
5.79	0.00641026	0
5.8	0.00641026	0
5.81	0.00641026	0
5.82	0.00641026	0
5.83	0.00641026	0
5.84	0.00641026	0
5.85	0.00641026	0
5.86	0.00641026	0
5.87	0.00641026	0
5.88	0.00641026	0
5.89	0.00641026	0
5.9	0.00641026	0
5.91	0.00641026	0
5.92	0.00641026	0
5.93	0.00641026	0
5.94	0.00641026	0
5.95	0.00641026	0
5.96	0.00641026	0
5.97	0.00641026	0
5.98	0.00641026	0
5.99	0.00641026	0
6	0.00641026	0
6.01	0.00320513	0
6.02	0.00320513	0
6.03	0.00320513	0
6.04	0.00320513	0
6.05	0.00320513	0
6.06	0.00320513	0
6.07	0.00320513	0
6.08	0.00320513	0
6.09	0.00320513	0
6.1	0.00320513	0
6.11	0.00320513	0
6.12	0.00320513	0
6.13	0.00320513	0
6.14	0.00320513	0
6.15	0.00320513	0
6.16	0.00320513	0
6.17	0.00320513	0
6.18	0.00320513	0
6.19	0.00320513	0
6.2	0.00320513	0
6.21	0.00320513	0
6.22	0.00320513	0
6.23	0.00320513	0
6.24	0.00320513	0
6.25	0.00320513	0
6.26	0.00320513	0
6.27	0.00320513	0
6.28	0.00320513	0
6.29	0.00320513	0
6.3	0.00320513	0
6.31	0.00320513	0
6.32	0.00320513	0
6.33	0.00320513	0
6.34	0.00320513	0
6.35	0.00320513	0
6.36	0.00320513	0
6.37	0.00320513	0
6.37	0	0
6.38	0	0
6.39	0	0
6.4	0	0
6.41	0	0
6.42	0	0
6.43	0	0
6.44	0	0
6.45	0	0
6.46	0	0
6.47	0	0
6.48	0	0
6.49	0	0
6.5	0	0
6.51	0	0
6.52	0	0
6.53	0	0
6.54	0	0
6.55	0	0
6.56	0	0
6.57	0	0
6.58	0	0
6.59	0	0
6.6	0	0
6.61	0	0
6.62	0	0
6.63	0	0
6.64	0	0
6.65	0	0
6.66	0	0
6.67	0	0
6.68	0	0
6.69	0	0
6.7	0	0
6.71	0	0
6.72	0	0
6.73	0	0
6.74	0	0
6.75	0	0
6.76	0	0
6.77	0	0
6.78	0	0
6.79	0	0
6.8	0	0
