# Supplementary material for: Tissue-specific mitochondrial HIGD1C promotes oxygen sensitivity in carotid body chemoreceptors
Source: eLife journal article supplement (doi:10.7554/elife.78915), 2022-10-18
Supplement: supp [file elife-78915-supp-v1.zip]

Figure 5 figure supplement 1– panel A

1. Ladder
2. WT+EV
3. WT+COX4I1
4. WT+COX4I2
5. WT+HIGD1C
6. WT+HIGD1C+COX4I1
7. WT+HIGD1C+COX4I2
8. WT+Higd1c
9. WT+Higd1c+COX4I1
10. WT+Higd1c+COX4I2

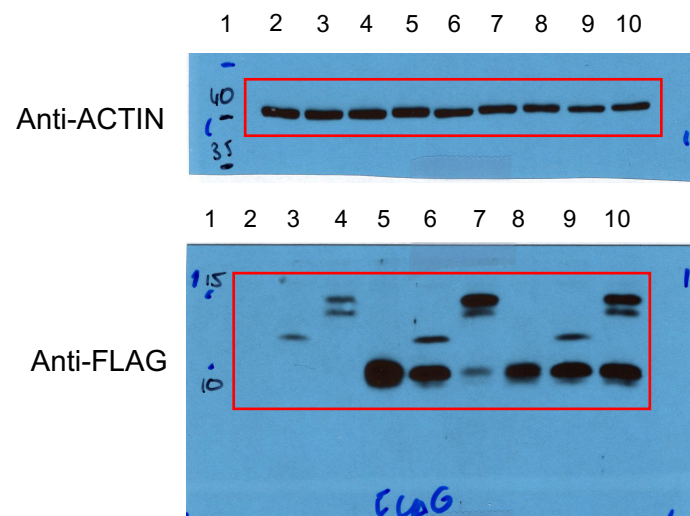

Figure 5 figure supplement 1— panel B

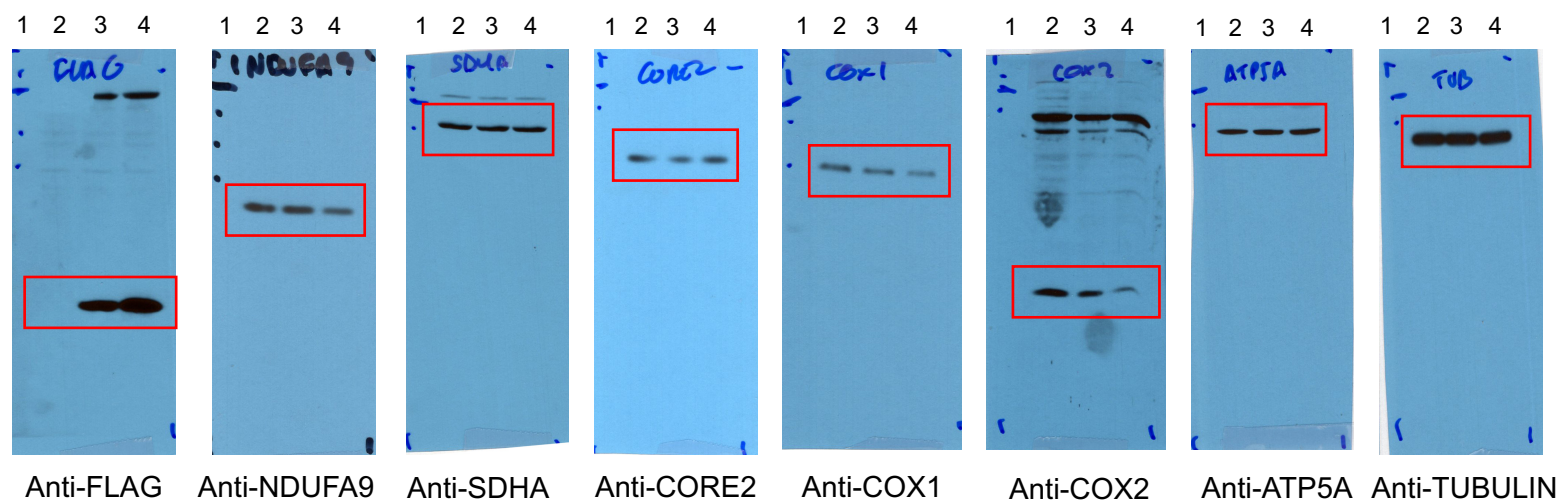

1. Ladder
2. WT+EV
3. WT+HIGD1C
4. WT+Higd1c

Figure 5 figure supplement 1– panel C

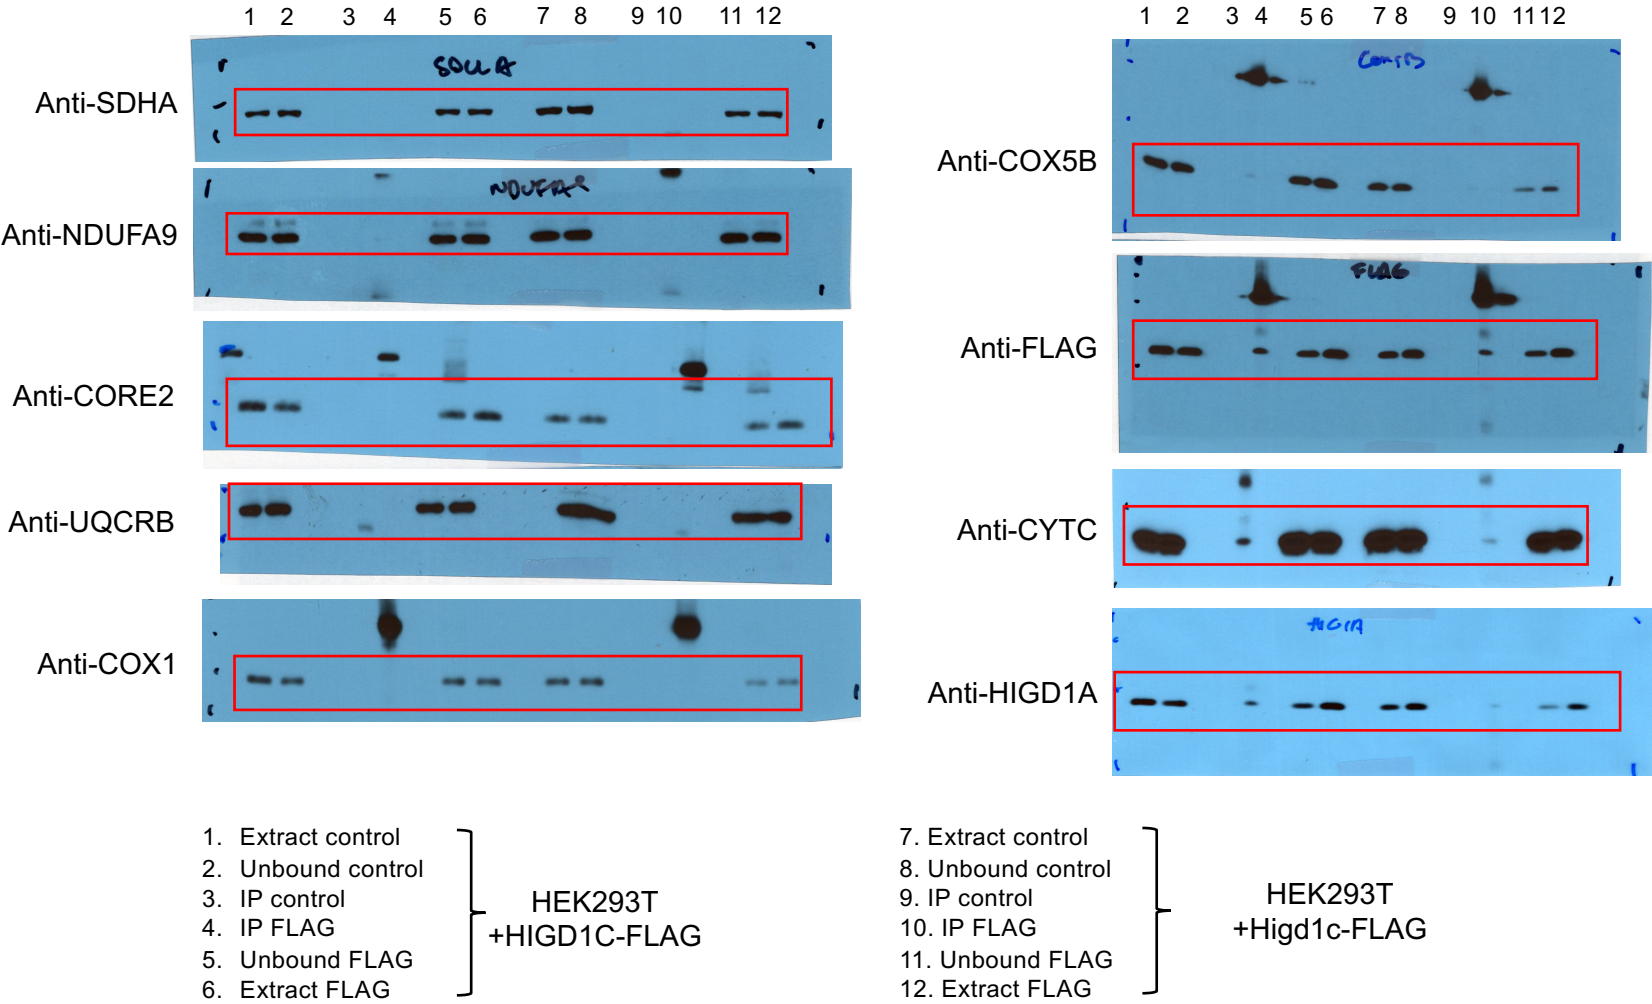

Figure 5 figure supplement 1– panel D

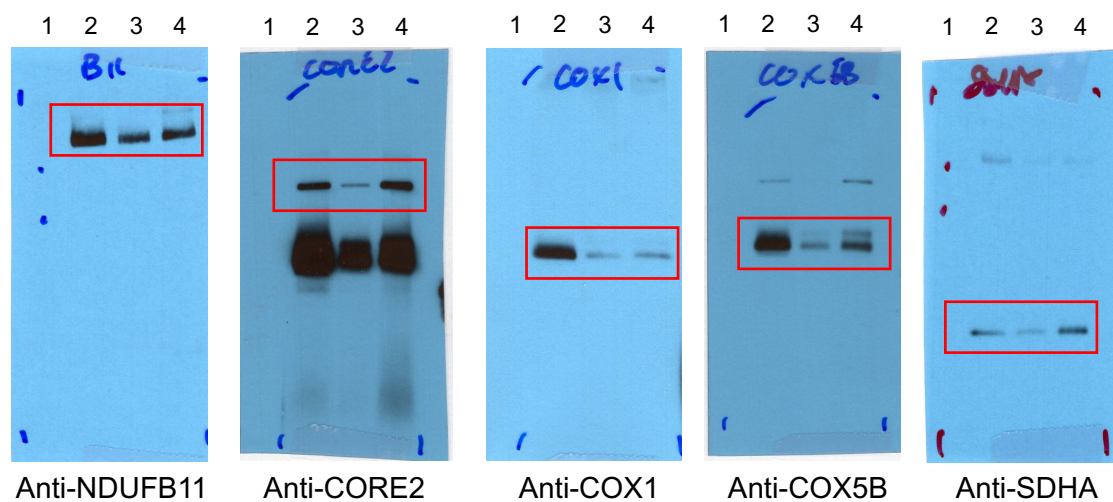

1. Ladder apoferritin
2. WT+EV
3. WT+HIGD1C
4. WT+Higd1c

Figure 5 figure supplement 1– panel E

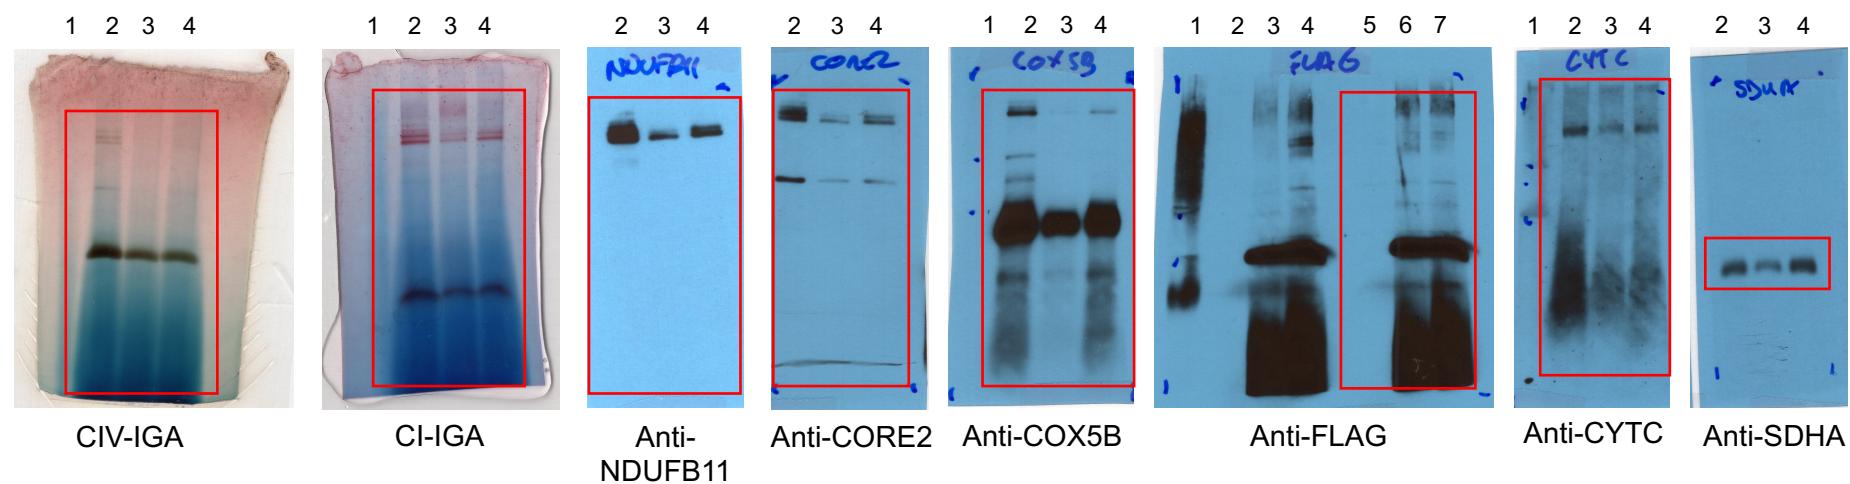

1. Ladder apoferritin
  2. WT+EV
  3. WT+HIGD1C
  4. WT+Higd1c
  5. WT+EV
  6. WT+HIGD1C
  7. WT+Higd1c
- } 2<sup>nd</sup> rep
