# Supplementary material for: Tissue-specific mitochondrial HIGD1C promotes oxygen sensitivity in carotid body chemoreceptors
Source: eLife journal article supplement (doi:10.7554/elife.78915), 2022-10-18
Supplement: supp [file Fig 1-fig supplement 1-source data 1.xlsx]

## Sheet: Fig 1-S1A and B
Mouse Tissue	RPKM
	Ndufs2	Cox4i2	Higd1c
CNS E11.5	57.971	0.575	0.02
CNS E14	49.534	0.39	0.044
CNS E18	37.668	0.579	0.018
Large intestine adult	74.216	0.228	0
Adrenal gland adult	92.722	0.492	0.087
Bladder adult	44.033	0.999	0
Cerebellum adult	67.276	0.643	0
Colon adult	60.059	0.5	0.534
Cortex adult	44.364	0.433	0.041
Duodenum adult	59.408	0.162	0
Front lobe adult	49.715	0.506	0
Genital fat adult	51.446	0.526	0
Heart adult	305.935	1.212	0
Kidney adult	146.837	0.328	6.105
Limb E14.5	46.005	2.122	0
Liver E14	44.009	0.129	0.022
Liver E14.5	38.728	0.146	0.031
Liver E18	46.217	0.143	0.161
Liver adult	72.009	0	0.032
Lung adult	40.842	10.555	0.034
Mammary gland adult	70.433	0.725	0
Ovary adult	46.751	0.894	0
Placenta adult	90.465	0.467	0.022
Small intestine adult	36.842	0.146	0
Spleen adult	22.724	0.084	0
Stomach adult	37.611	0.472	0
Subcutaneous fat pad adult	69.857	1.167	0
Testis adult	34.7	0.508	0
Thymus adult	41.566	0.234	0
Whole brain E14.5	38.478	0.368	0

## Sheet: Fig 1-S1C and D
Human Tissue	nTPM
	NDUFS2	COX4I2	HIGD1C
Cerebral cortex	46.9	9.2	1.3
Cerebellum	42.3	6.4	3.2
Choroid plexus	64.4	6.2	0.5
Olfactory bulb	35.6	6	0.3
Basal ganglia	38.7	6.4	1.1
Thalamus	42.3	6.6	1.2
Hypothalamus	42.7	6.5	0.6
Midbrain	42.8	6.8	0.7
Pons	48.4	6.9	2.7
Medulla obloganta	45.1	6.7	1.1
Hippocampal formation	38.2	6.3	0.5
Spinal cord	35.9	6.4	0.6
White matter	50.1	6.4	2.3
Amygdala	35.5	6.6	0.7
Retina	36.5	1.1	0.2
Thyroid gland	45.4	14.8	1
Parathyroid gland	157.9	9.4	0.5
Adrenal gland	99	1.1	0.3
Pituitary gland	36.1	2.2	0.1
Lung	48.9	49.5	0.6
Salivary gland	54	3.6	0.4
Esophagus	62.5	5.4	0.1
Tongue	639.4	19.6	0.2
Stomach	73.9	4.3	0.5
Duodenum	103.3	2	0
Small intestine	82.1	5.9	0.3
Colon	97.4	4.4	0.2
Rectum	102.7	2.7	0.3
Liver	178.9	1.1	1.2
Gallbladder	37.1	10.7	0.5
Pancreas	48.1	2.3	1
Kidney	138.2	3.6	0.2
Urinary bladder	58.1	7.8	0.3
Testis	29.8	1.5	1.7
Epididymis	33.7	4	0
Seminal vesicle	49.5	4.8	0.2
Prostate	46.1	10.2	0.1
Vagina	40.4	6.8	0
Ovary	52	2.9	0.4
Fallopian tube	52.9	5	0.5
Endometrium	41.8	7.5	0.2
Cervix	40.5	4.8	0.1
Placenta	41.9	116.4	0
Breast	50.1	16	0.1
Heart muscle	276.2	33.1	0
Smooth muscle	59.1	7.1	0.3
Skeletal muscle	469.2	8.8	0.3
Adipose tissue	60.7	18.9	0.4
Skin	51.3	4.7	0.6
Appendix	37.8	1.7	0
Spleen	44	1.7	0.3
Lymph node	42.7	4.8	0.8
Tonsil	60.6	3	0.3
Bone marrow	39.9	0	0
Thymus	48.8	1.8	0.4
