# Supplementary material for: Tissue-specific mitochondrial HIGD1C promotes oxygen sensitivity in carotid body chemoreceptors
Source: eLife journal article supplement (doi:10.7554/elife.78915), 2022-10-18
Supplement: supp [file Fig 1-fig supplement 3-source data 1.xlsx]

## Sheet: Fig 1-S3A
Tissue	log[% of Actb]
	Higd1c+/+						Higd1c-/-
AM	-1.51527	-1.22519	-1.37479	-2.36552	-1.43699		-3.5376	-3.31876	-2.96658	-3.20199	-3.83548
CB	0.667914	0.504858	0.475223	0.850475	0.0605505	0.582391	-1.12668	-1.10771	-1.38581	-2.30804	-2.58197
PG/NG/JG	-1.00821	-1.62757	-2.60906	-2.99568	-3.26761	-2.85699	-3.1979	-3.73488	-4	-3.48149	-3.17025	-3.12315
MO	-3.38091	-2.84466	-4.1549	-3.92082	-2.80663	-2.73027	-3.6296	-3.79073	-4.39794	-3.24413	-3.58373	-3.46783
Ctx	-2.49377	-2.43462	-3.65758	-2.47496	-2.67288	-3.13413	-4.1612	-3.92383	-4.22185	-2.98716	-3.14536	-2.80369
OB	-3.38195	-2.77989	-3.95861	-3.88606	-2.98137	-3.4032	-3.84064	-3.72617	-4.09691	-3.29243	-3.44279	-3.85178
SCG	-0.965047	-0.750315	-1.23995	-0.610002	-1.40461	-0.950123	-3.40165	-3.10999	-3.74473	-3.33724	-3.35585	-3.9947

## Sheet: Fig 1-S3B
Tissue	log[% of Actb]
	Higd1c+/+						Higd1c-/-
AM	-0.78912	-0.991144	-0.724712	-1.54047	-0.659554		-3.5376	-3.85387	-3.82391	-3.20199	-3.83548
CB	1.56959	1.4806	1.45168	1.51242	1.07722	1.35754	-0.473712	-0.923178	-2.06753	-2.46515	-2.74137
PG/NG/JG	-2.2204	-2.55752	-1.88107	-2.64782	-2.20712	-2.41017	-3.55284	-3.74473	-4	-3.48149	-3.58547	-3.75331
MO	-4.30103	-2.60555	-3.88606	-2.52724	-2.70527	-1.96911	-4.52288	-4.39794	-4.39794	-3.82391	-3.97368	-3.99331
Ctx	-3.1549	-3.74473	-2.92082	-2.81816	-3.48022	-3.98405	-4.39794	-4.30103	-4.22185	-3.45593	-4.02295	-3.95388
OB	-4.09691	-4.39794	-4.30103	-3.88606	-3.55513	-4.00161	-4.30103	-4.1549	-4.09691	-3.92082	-3.84014	-3.85178
SCG	-0.0634109	0.0383936	-0.274154	-0.0549896	-0.506699	-0.139315	-4.1549	-3.07572	-3.92082	-3.33724	-3.58246	-3.9947

## Sheet: Fig 1-S3C
Tissue	log[% of Actb]
	Higd1c+/+						Higd1c-/-
Kidney	-1.59599	-1.18238	-1.40043	-1.25411	-1.58657	-1.40042	-4.61979	-4.52288	-4.61979	-3.48755	-3.3947	-3.05257
Heart	-3.38722	-2.69897	-2.94692	-2.70115	-2.75203		-2.59176	-3.16115	-3.42022	-1.93442	-2.06753
Lung	-4.39794	-4	-4	-3.56864	-2.54212	-2.65561	-4	-4.04576	-4.69897	-2.86328	-4.52288
Liver	-3.09691	-3.42022	-2.80688	-2.02641	-1.64073	-3.20761	-2.80688	-4.09691	-3.58503	-3.09691	-3.5376
Spleen	-4.39794	-3.95861	-3.21467	-2.68613	-3.67778		-3.79588	-3.72125	-4	-3.11919	-3.48149

## Sheet: Fig 1-S3D
Tissue	log[% of Actb]
	Higd1c+/+						Higd1c-/-
Kidney	-2.74715	-2.56864	-2.7122	-2.56384	-2.91721	-2.8729	-4.69897	-4.52288	-4.69897	-4	-4.1549	-4.09691
Heart	-3.38722	-3.01773	-3.20066	-3.61979	-3.82391		-2.63078	-3.16115	-3.42022	-3.63827	-4
Lung	-4.09691	-4.39794	-3.63827	-3.95861	-4.39794	-4.52288	-4	-4.69897	-4.52288	-4.52288	-4.69897
Liver	-3.09691	-3.55284	-3.12494	-3.65758	-3.65758	-3.4437	-3.03152	-3.72125	-3.88606	-3.82391	-3.65758
Spleen	-4.39794	-3.95861	-4.22185	-4.30103	-4.69897		-4.1549	-4.39794	-4.30103	-4.52288	-4.52288
