# Supplementary material for: Tissue-specific mitochondrial HIGD1C promotes oxygen sensitivity in carotid body chemoreceptors
Source: eLife journal article supplement (doi:10.7554/elife.78915), 2022-10-18
Supplement: supp [file Fig 1-fig supplement 4-source data 1.xlsx]

## Sheet: Fig 1-S4K
Allele	% of wild-type
	Higd1c +/+												Higd1c -/-
3-1	62.6536	162.388	98.2876	144.408	67.1641	103.103							0.0591938	0.0736355	0.0593542	1.87597	1.04491	2.2959
1-1	105.445	110.76	85.6236	110.17	119.036	76.2534	102.894	82.1458	81.9083	130.776	131.04	84.2879	26.0776	39.4061	77.4616	39.2094	33.9995	41.6188	11.8842	24.4763	19.1267	58.0372	39.407	29.9922
5-3	106.04	97.0684	97.1522	100.154	80.9313	123.372							18.2945	3.00049	11.8565	10.4764	9.71204	14.5821
