# Supplementary material for: Tissue-specific mitochondrial HIGD1C promotes oxygen sensitivity in carotid body chemoreceptors
Source: eLife journal article supplement (doi:10.7554/elife.78915), 2022-10-18
Supplement: supp [file Fig 1-fig supplement 5-source data 1.xlsx]

## Sheet: Fig 1-S5A
log2RPKM
Higd1a	Higd2a	Higd1c	Cox4i1	Cox4i2	Ndufa4	Ndufa4l2
3.772	6.568	10.021	8.734	11.09	3.71	13.063
-1.237	6.016	9.088	8.4	10.398	3.92	11.885
-3.377	6.783	10.486	9.033	10.78	3.66	12.988
-3.128	5.941	10.23	8.858	10.457	4.338	13.144
-3.788	1.348	10.703	9.24	10.401	3.883	13.028
-3.666	7.761	9.808	6.569	7.661	2.884	11.799
-3.754	6.199	9.661	7.721	9.322	4.8	12.112

## Sheet: Fig 1-S5B
Gene	log[% of GAPDH]
	CB					AM (adult)			AM (neonate)			Thoracic Spinal Cord
Higd1c 1	1.42387	1.50095	1.1892	1.11775	1.22214	0.597244	0.477372	0.526734	0.143138	0.247367	0.158606	-3.10433	-3.07785	-3.20855
Higd1c 1	1.41446	1.47064	1.56512	1.5195	1.61936	0.754968	0.646031	0.66665	0.26868	0.308087	0.309363	-2.73489	-2.64834	-2.79046
Kcnk3	1.52395	1.43432	1.22725	1.21992	1.16041	1.70044	1.71694	1.55497	1.96844	1.63456	1.52256	-1.50061	-1.41818	-1.51553
Kcnk9	1.12579	1.27989	1.18916	1.19295	1.21937	0.951284	0.874041	1.01697	0.924812	0.876413	0.936064	-0.523095	-0.292978	-0.597845
Th	1.78539	1.6751	1.68779			2.597	2.4648	2.64892	2.14699	2.24567	2.16182	-2.44997	-2.07743	-2.12278
Olr59	1.14031	1.18513	0.975117	1.07917	1.07813	-1.50493	-1.53386	-1.27113	-1.38832	-1.38445	-1.2546	-2.06726	-1.72497	-1.66159

## Sheet: Fig 1-S5C
Gene	log[% of GAPDH]
	CB		AG
HIGD1A	1.33844	2.08745	1.27206
HIGD2A	1.33292	1.71865	1.56373
HIGD1C	0.819793	0.833032	-2.5376
COX4I1	0.651062	0.792718	0.428661
COX4I2	0.933527	1.38538	-0.647374
NDUFA4L2	2.18172	2.42361	-2.52288
TH	-1.56069	-0.775571	1.5542
OR51E2	0.446536	0.415584	-2.16431
