# Supplementary material for: Tissue-specific mitochondrial HIGD1C promotes oxygen sensitivity in carotid body chemoreceptors
Source: eLife journal article supplement (doi:10.7554/elife.78915), 2022-10-18
Supplement: supp [file Fig 1-source data 1.xlsx]

## Sheet: Fig 1A
Gene	log2RPKM
	AM			CB
Higd1c	1.14167	1.23482	0.265061	8.87463	8.84182	9.14198
Cox4i2	-1.28804	0.324977	-0.772331	3.12467	3.13968	4.83017
Ndufa4l2	5.69229	7.19473	7.58477	9.02701	9.36897	10.3003

## Sheet: Fig 1B
Gene	log[% of GAPDH]
	AG	CB
HIGD1C	-2.5376	0.819793	0.833032
COX4I2	-0.647374	0.933527	1.38538
NDUFA4L2	-2.52288	2.18172	2.42361

## Sheet: Fig 1F
Allele	% of wild-type
	Higd1c+/+						Higd1c-/-
3-1	131.396	90.2665	84.3124	54.8377	182.356		2.10857	2.20271	1.16108	0.234689	0.1249
1-1	65.7413	83.9815	181.125	103.815	110.229	87.3864	22.0375	55.8477	66.8829	28.6187	25.1669	39.3842
5-3	125.037	100.764	79.3697				32.1045	23.2144	96.3817

## Sheet: Fig 1I
Allele	Number of TH+ cells (1/3 of CB)
	Higd1c+/+						Higd1c-/-
3-1	223	96	187	249	221	257	231	105	166	147	200
1-1	173	174	292	99	119		132	235	118	77	410	124	176
5-3	266	192	141	121	96	133	252	190	299	140	83	85
