# Supplementary material for: Tissue-specific mitochondrial HIGD1C promotes oxygen sensitivity in carotid body chemoreceptors
Source: eLife journal article supplement (doi:10.7554/elife.78915), 2022-10-18
Supplement: supp [file Fig 2-fig supplement 1-source data 1.xlsx]

## Sheet: Fig 2-S1D
Respiratory Rate (min^-1)
Higd1c+/+		Higd1c-/-
21% O2	10% O2	21% O2	10% O2
192.992	221.221	164.562	191.572
179.377	196.073	162.298	188.819
172.052	193.958	177.678	183.523
179.206	207.328	191.906	197.628
182.195	229.912	152.894	183.583
181.303	214.152	164.724	174.629
173.66	205.518	160.093	193.071
179.968	236.052	179.166	193.686
175.059	240.02	183.428	212.566
		142.735	160.644
		165.156	195.571
		175.848	181.52

## Sheet: Fig 2-S1E
Tidal Volume (ml)
Higd1c+/+		Higd1c-/-
21% O2	10% O2	21% O2	10% O2
0.21589	0.265667	0.196855	0.181547
0.218839	0.214371	0.209167	0.210897
0.201504	0.209199	0.270154	0.290086
0.224347	0.256079	0.219494	0.210834
0.198544	0.215343	0.225706	0.231737
0.228686	0.247964	0.197235	0.208135
0.210242	0.21303	0.198838	0.206739
0.219227	0.225587	0.194561	0.195473
0.202442	0.237079	0.238412	0.225621
		0.188389	0.17259
		0.220715	0.211749
		0.180752	0.183556

## Sheet: Fig 2-S1F
Minute Ventilation (ml min^-1)
Higd1c+/+		Higd1c-/-
21% O2	10% O2	21% O2	10% O2
42.0225	58.8237	32.7928	34.7779
39.4155	41.8739	34.437	39.7853
35.1432	40.5943	48.4928	53.0849
40.6421	53.0976	42.1032	41.6495
36.5036	49.6553	35.3358	42.4652
41.926	52.9329	33.0526	36.5264
37.298	43.6934	32.3419	39.7726
39.348	53.1787	35.4516	37.9945
35.5901	56.9656	43.7007	47.614
		27.143	27.6876
		36.72	41.3489
		32.0899	33.6184

## Sheet: Fig 2-S1G
Hypoxic Response (%)
RR		TV		MV
+/+	-/-	+/+	-/-	+/+	-/-
14.6269	16.4132	23.0569	-7.77624	39.9813	6.05349
9.30743	16.3413	-2.04147	0.827011	6.23704	15.5306
12.7323	3.28923	3.81919	7.37836	15.5109	9.46972
15.6928	2.98184	14.144	-3.94546	30.6465	-1.0776
26.1901	20.0723	8.46111	2.67205	36.0286	20.176
18.1182	6.01357	8.42993	5.52639	26.2534	10.51
18.3453	20.5998	1.32625	3.97358	17.1467	22.9755
31.1637	8.10439	2.90149	0.46862	35.1497	7.17308
37.1082	15.8856	17.1092	-5.36503	60.0605	8.9549
	12.5472		-8.38628		2.00633
	18.416		-4.06215		12.6062
	3.22519		1.55101		4.76311

## Sheet: Fig 2-S1H
Respiratory Rate (min^-1)
Higd1c+/+		Higd1c-/-
21% O2	10% O2	21% O2	10% O2
164.403	215.638	158.96	184.883
168.978	223.459	165.568	173.271
147.214	198.664	172.124	193.487
192.77	224.224	187.966	203.795
156.633	189.183	163.488	199.777
163.193	230.978	167.058	186.633
173.577	241.87	159.851	186.031
198.217	227.025	170.57	190.749
177.424	214.858	158.824	198.411
191.315	206.111
183.031	244.276

## Sheet: Fig 2-S1I
Tidal Volume (ml)
Higd1c+/+		Higd1c-/-
21% O2	10% O2	21% O2	10% O2
0.222925	0.275141	0.19013	0.197245
0.208728	0.239603	0.228143	0.231596
0.201738	0.230227	0.196288	0.1942
0.221939	0.23544	0.235783	0.200139
0.179255	0.221326	0.214919	0.239827
0.186647	0.219193	0.204608	0.195378
0.221735	0.22211	0.21618	0.2334
0.224392	0.240967	0.193636	0.214104
0.221818	0.235609	0.257324	0.23528
0.258399	0.244114
0.199971	0.249742

## Sheet: Fig 2-S1J
Minute Ventilation (ml min^-1)
Higd1c+/+		Higd1c-/-
21% O2	10% O2	21% O2	10% O2
37.1614	59.6247	30.5714	36.5067
35.4385	53.8991	37.4941	39.6651
30.5479	45.7416	34.0499	37.6258
42.6106	53.2533	44.3182	40.9469
28.5646	41.8084	35.6015	47.864
30.8313	50.6681	34.3645	36.6297
39.9275	53.5189	34.8706	43.3922
45.0667	54.6762	33.1673	40.857
39.6066	50.7643	41.161	46.5847
49.901	50.1934
36.8722	60.9358

## Sheet: Fig 2-S1K
Hypoxic Response (%)
RR		TV		MV
+/+	-/-	+/+	-/-	+/+	-/-
31.164	16.3076	23.4228	3.74216	60.4478	19.4146
32.2415	4.65289	14.7924	1.51337	52.0921	5.79009
34.9489	12.4112	14.1221	-1.06406	49.7375	10.5019
16.3171	8.42125	6.08351	-15.1173	24.9768	-7.60698
20.7806	22.1971	23.4701	11.5892	46.3645	34.444
41.5367	11.7176	17.4374	-4.51118	64.3397	6.59176
39.3445	16.3778	0.168983	7.96597	34.0402	24.4378
14.5336	11.8305	7.38629	10.5704	21.3228	23.1845
21.0989	24.9246	6.21756	-8.5666	28.1713	13.1768
7.73412		-5.52828		0.585908
33.4612		24.8894		65.2624

## Sheet: Fig 2-S1L
Higd1c+/+
RR			TV			MV
1-1	3-1	5-3	1-1	3-1	5-3	1-1	3-1	5-3
40.4597	14.6269	31.164	8.73341	23.0569	23.4228	49.3245	39.9813	60.4478
11.8213	9.30743	32.2415	25.1497	-2.04147	14.7924	38.0814	6.23704	52.0921
19.4619	12.7323	34.9489	14.9508	3.81919	14.1221	35.0331	15.5109	49.7375
29.5406	15.6928	16.3171	-5.35305	14.144	6.08351	21.4117	30.6465	24.9768
26.3464	26.1901	20.7806	18.0949	8.46111	23.4701	46.612	36.0286	46.3645
35.5895	18.1182	41.5367	23.637	8.42993	17.4374	65.9997	26.2534	64.3397
35.9584	18.3453	39.3445	5.55682	1.32625	0.168983	40.6758	17.1467	34.0402
11.9057	31.1637	14.5336	4.24288	2.90149	7.38629	15.2484	35.1497	21.3228
30.7664	37.1082	21.0989	10.5879	17.1092	6.21756	46.2989	60.0605	28.1713
30.0506		7.73412	6.39815		-5.52828	37.0622		0.585908
21.2295		33.4612	17.4293		24.8894	41.742		65.2624

## Sheet: Fig 2-S1M
Higd1c-/-
RR			TV			MV
1-1	3-1	5-3	1-1	3-1	5-3	1-1	3-1	5-3
19.5956	16.4132	16.3076	19.2781	-7.77624	3.74216	40.2775	6.05349	19.4146
8.43129	16.3413	4.65289	-8.84568	0.827011	1.51337	-1.85005	15.5306	5.79009
9.57649	3.28923	12.4112	-0.509952	7.37836	-1.06406	7.33818	9.46972	10.5019
4.0802	2.98184	8.42125	4.72394	-3.94546	-15.1173	8.02089	-1.0776	-7.60698
5.14672	20.0723	22.1971	12.6982	2.67205	11.5892	17.2197	20.176	34.444
22.7072	6.01357	11.7176	-0.148304	5.52639	-4.51118	21.4506	10.51	6.59176
19.756	20.5998	16.3778	-2.3966	3.97358	7.96597	14.9062	22.9755	24.4378
10.4428	8.10439	11.8305	5.03105	0.46862	10.5704	13.5612	7.17308	23.1845
15.2816	15.8856	24.9246	-2.53263	-5.36503	-8.5666	11.2945	8.9549	13.1768
14.651	12.5472		-10.0222	-8.38628		1.47893	2.00633
21.7154	18.416		-6.77944	-4.06215		12.6933	12.6062
	3.22519			1.55101			4.76311
