# Supplementary material for: Tissue-specific mitochondrial HIGD1C promotes oxygen sensitivity in carotid body chemoreceptors
Source: eLife journal article supplement (doi:10.7554/elife.78915), 2022-10-18
Supplement: supp [file Fig 2-fig supplement 2-source data 1.xlsx]

## Sheet: Fig 2-S2A
Respiratory Rate (min^-1)
Higd1c+/+		Higd1c-/-
0% CO2	5% CO2	0% CO2	5% CO2
180.287	298.202	153.921	294.332
183.861	269.995	160.777	277.175
176.876	265.406	182.84	279.078
171.505	308.423	174.935	301.278
175.139	288.088	147.37	288.081
187.154	307.063	168.177	300.332
161.656	296.057	159.236	305.407
181.584	294.932	179.6	302.33
180.956	300.125	176.993	267.657
		145.814	223.103
		179.109	298.669
		177.145	293.253

## Sheet: Fig 2-S2B
Tidal Volume (ml)
Higd1c+/+		Higd1c-/-
0% CO2	5% CO2	0% CO2	5% CO2
0.21278	0.344185	0.183967	0.262254
0.236948	0.384752	0.189395	0.309592
0.197782	0.274041	0.273855	0.367534
0.202996	0.405556	0.209273	0.356874
0.194332	0.286334	0.216786	0.397907
0.24439	0.393851	0.20041	0.380242
0.197196	0.315578	0.190325	0.297167
0.232521	0.383404	0.191635	0.365339
0.206065	0.337612	0.217986	0.336233
		0.189076	0.281507
		0.248408	0.331482
		0.18524	0.249349

## Sheet: Fig 2-S2C
Minute Ventilation (ml min^-1)
Higd1c+/+		Higd1c-/-
0% CO2	5% CO2	0% CO2	5% CO2
38.5252	102.4	28.5968	77.2292
44.0616	104.359	30.6596	86.017
35.4725	72.8716	50.6461	102.691
34.8696	125.038	36.8735	107.516
34.2483	82.6468	32.5561	114.733
45.5546	120.977	34.929	114.44
32.5915	93.3552	30.5975	90.26
41.7755	113.18	34.8886	110.557
37.4591	101.218	38.6222	90.0271
		27.5082	62.779
		44.9031	99.0423
		33.0124	73.0428

## Sheet: Fig 2-S2D
Hypercapnic Response (%)
RR		TV		MV
+/+	-/-	+/+	-/-	+/+	-/-
65.4038	91.2226	61.756	42.5552	170.062	165.799
46.847	72.3967	62.3783	63.464	180.555	136.848
50.0516	52.6355	38.5569	34.2074	102.763	105.431
79.8338	72.2225	99.7851	70.5304	191.581	258.589
64.4909	95.4805	47.3423	83.5479	252.415	141.316
64.0698	78.5807	61.1568	89.7316	227.635	165.566
83.1397	91.7948	60.0325	56.1368	194.992	186.441
62.4217	68.3349	64.8899	90.6436	216.884	170.923
65.8556	51.2242	63.8372	54.2455	133.097	170.211
	53.0056		48.8855	128.219
	66.7523		33.4425	120.569
	65.5439		34.6085	121.259

## Sheet: Fig 2-S2E
Respiratory Rate (min^-1)
Higd1c+/+		Higd1c-/-
0% CO2	5% CO2	0% CO2	5% CO2
164.403	215.638	158.96	184.883
168.978	223.459	165.568	173.271
147.214	198.664	172.124	193.487
192.77	224.224	187.966	203.795
156.633	189.183	163.488	199.777
163.193	230.978	167.058	186.633
173.577	241.87	159.851	186.031
198.217	227.025	170.57	190.749
177.424	214.858	158.824	198.411
191.315	206.111
183.031	244.276

## Sheet: Fig 2-S2F
Tidal Volume (ml)
Higd1c+/+		Higd1c-/-
0% CO2	5% CO2	0% CO2	5% CO2
0.219032	0.381036	0.198331	0.291059
0.202112	0.351466	0.204462	0.357444
0.221237	0.390033	0.19524	0.354297
0.179725	0.284927	0.203638	0.241616
0.174794	0.313702	0.184485	0.281118
0.197376	0.332348	0.198695	0.303752
0.199891	0.279357	0.210386	0.402008
0.21931	0.44375	0.203191	0.351502
0.212802	0.28465	0.242011	0.392651
0.241728	0.355087
0.186095	0.289792

## Sheet: Fig 2-S2G
Minute Ventilation (ml min^-1)
Higd1c+/+		Higd1c-/-
0% CO2	5% CO2	0% CO2	5% CO2
38.8307	94.7289	33.7004	88.6083
33.28	107.151	36.3564	109.526
37.3979	121.111	31	107.726
32.9338	75.0472	38.2667	67.9404
27.7513	94.4421	29.698	86.0895
32.2333	99.7217	33.8306	82.3104
34.4366	83.9304	34.7717	124.366
44.2378	113	37.0125	103.027
36.9218	79.3994	35.5547	98.9861
44.5048	107.589
36.805	82.8981

## Sheet: Fig 2-S2H
Hypercapnic Response (%)
RR		TV		MV
+/+	-/-	+/+	-/-	+/+	-/-
40.3273	81.8266	73.9636	46.7541	143.954	162.93
86.9986	73.125	73.897	74.8214	221.967	201.257
93.4403	93.345	76.2962	81.4673	223.845	247.505
43.8983	48.9872	58.5351	18.6494	127.873	77.5446
93.9063	92.9116	79.4696	52.3796	240.316	189.883
88.4405	59.8823	68.3835	52.8733	209.375	143.302
75.5132	87.8026	39.7547	91.0808	143.724	257.665
28.4648	61.9509	102.339	72.9908	155.437	178.358
61.6525	71.9185	33.763	62.2452	115.048	178.405
67.5784		46.8954		141.748
45.0164		55.7224		125.236

## Sheet: Fig 2-S2I
Higd1c+/+
RR			TV			MV
1-1	3-1	5-3	1-1	3-1	5-3	1-1	3-1	5-3
101.722	65.4038	40.3273	61.3056	61.756	73.9636	221.358	165.799	143.954
66.14	46.847	86.9986	21.6126	62.3783	73.897	99.6436	136.848	221.967
63.2225	50.0516	93.4403	38.1899	38.5569	76.2962	123.621	105.431	223.845
69.6141	79.8338	43.8983	30.3508	99.7851	58.5351	118.237	258.589	127.873
110.571	64.4909	93.9063	49.3906	47.3423	79.4696	210.983	141.316	240.316
101.819	64.0698	88.4405	86.256	61.1568	68.3835	274.259	165.566	209.375
70.2198	83.1397	75.5132	76.2066	60.0325	39.7547	194.048	186.441	143.724
75.7478	62.4217	28.4648	55.4521	64.8899	102.339	172.945	170.923	155.437
38.7795	65.8556	61.6525	55.8874	63.8372	33.763	118.505	170.211	115.048
82.391		67.5784	48.8295		46.8954	166.639		141.748
52.0017		45.0164	43.981		55.7224	118.586		125.236

## Sheet: Fig 2-S2J
Higd1c-/-
RR			TV			MV
1-1	3-1	5-3	1-1	3-1	5-3	1-1	3-1	5-3
75.4949	91.2226	81.8266	57.8953	42.5552	46.7541	174.543	170.062	162.93
92.7515	72.3967	73.125	59.6727	63.464	74.8214	205.897	180.555	201.257
70.4708	52.6355	93.345	24.3046	34.2074	81.4673	107.549	102.763	247.505
49.7716	72.2225	48.9872	57.1361	70.5304	18.6494	134.993	191.581	77.5446
65.3399	95.4805	92.9116	155.153	83.5479	52.3796	302.713	252.415	189.883
72.721	78.5807	59.8823	61.7476	89.7316	52.8733	179.544	227.635	143.302
65.3335	91.7948	87.8026	32.947	56.1368	91.0808	118.426	194.992	257.665
83.584	68.3349	61.9509	94.8436	90.6436	72.9908	255.634	216.884	178.358
72.6059	51.2242	71.9185	62.8805	54.2455	62.2452	178.779	133.097	178.405
78.3607	53.0056	67.5784	61.0061	48.8855	46.8954	181.176	128.219	141.748
76.9841	66.7523	45.0164	61.5888	33.4425	55.7224	186.505	120.569	125.236
	65.5439			34.6085			121.259
