# Supplementary material for: Tissue-specific mitochondrial HIGD1C promotes oxygen sensitivity in carotid body chemoreceptors
Source: eLife journal article supplement (doi:10.7554/elife.78915), 2022-10-18
Supplement: supp [file Fig 2-source data 1.xlsx]

## Sheet: Fig 2A
Respiratory Rate (min^-1)
Higd1c+/+		Higd1c-/-
21% O2	10% O2	21% O2	10% O2
141.948	199.38	160.915	192.447
179.808	201.063	182	197.345
178.519	213.262	185.783	203.575
170.391	220.726	186.215	193.813
154.806	195.592	178.401	187.583
164.808	223.462	171.526	210.474
183.379	249.319	173.294	207.53
182.879	204.652	176.4	194.821
197.827	258.691	167.746	193.381
179.906	233.969	181.153	207.693
191.985	232.743	163.544	199.058

## Sheet: Fig 2B
Tidal Volume (ml)
Higd1c+/+		Higd1c-/-
21% O2	10% O2	21% O2	10% O2
0.179457	0.195129	0.172641	0.205923
0.196058	0.245367	0.202047	0.184175
0.180228	0.207173	0.1798	0.178883
0.212961	0.201561	0.254048	0.266049
0.187777	0.221755	0.18062	0.203556
0.218723	0.270422	0.185359	0.185084
0.195003	0.205839	0.225417	0.220015
0.21014	0.219056	0.209007	0.219522
0.198953	0.220017	0.212606	0.207221
0.208037	0.221347	0.218095	0.196238
0.185746	0.21812	0.192943	0.179863

## Sheet: Fig 2C
Minute Ventilation (ml min^-1)
Higd1c+/+		Higd1c-/-
21% O2	10% O2	21% O2	10% O2
26.1826	39.0971	27.9958	39.2718
35.791	49.4207	37.0229	36.338
32.4665	43.8406	33.9278	36.4175
36.7488	44.6174	47.1975	50.9832
29.5647	43.3454	32.8191	38.4705
36.6847	60.8965	32.1109	38.999
36.4692	51.3034	39.57	45.4684
38.7254	44.6304	37.5871	42.6844
38.9511	56.985	35.9488	40.0091
37.9265	51.9829	40.29	40.8858
35.7067	50.6113	31.935	35.9886

## Sheet: Fig 2D
Hypoxic Response (%)
RR		TV		MV
+/+	-/-	+/+	-/-	+/+	-/-
40.4597	19.5956	8.73341	19.2781	49.3245	40.2775
11.8213	8.43129	25.1497	-8.84568	38.0814	-1.85005
19.4619	9.57649	14.9508	-0.509952	35.0331	7.33818
29.5406	4.0802	-5.35305	4.72394	21.4117	8.02089
26.3464	5.14672	18.0949	12.6982	46.612	17.2197
35.5895	22.7072	23.637	-0.148304	65.9997	21.4506
35.9584	19.756	5.55682	-2.3966	40.6758	14.9062
11.9057	10.4428	4.24288	5.03105	15.2484	13.5612
30.7664	15.2816	10.5879	-2.53263	46.2989	11.2945
30.0506	14.651	6.39815	-10.0222	37.0622	1.47893
21.2295	21.7154	17.4293	-6.77944	41.742	12.6933

## Sheet: Fig 2E
Respiratory Rate (min^-1)
Higd1c+/+		Higd1c-/-
0% CO2	5% CO2	0% CO2	5% CO2
148.561	299.68	167.908	294.67
180.499	299.881	160.106	308.606
185.496	302.771	178.817	304.83
162.952	276.39	167.735	251.219
144.542	304.364	172.775	285.667
147.955	298.602	177.737	306.99
162.78	277.083	172.57	285.316
175.156	307.832	164.361	301.741
202.6	281.167	157.274	271.465
164.36	299.778	165.673	295.495
190.831	290.066	163.787	289.878

## Sheet: Fig 2F
Tidal Volume (ml)
Higd1c+/+		Higd1c-/-
0% CO2	5% CO2	0% CO2	5% CO2
0.169691	0.273722	0.167755	0.264877
0.178763	0.217399	0.197757	0.315765
0.219883	0.303856	0.181477	0.225584
0.19913	0.259568	0.251989	0.395966
0.170342	0.254474	0.189102	0.4825
0.202554	0.377269	0.173206	0.280157
0.185726	0.327262	0.200759	0.266903
0.186466	0.289865	0.210119	0.409403
0.180462	0.281317	0.190402	0.310128
0.185742	0.276438	0.20452	0.32929
0.185408	0.266953	0.187921	0.30366

## Sheet: Fig 2G
Minute Ventilation (ml min^-1)
Higd1c+/+		Higd1c-/-
0% CO2	5% CO2	0% CO2	5% CO2
25.5133	81.9891	28.4059	77.9864
32.6349	65.1535	31.7715	97.1882
41.0969	91.9013	33.0272	68.5478
32.9596	71.9302	42.535	99.9543
24.896	77.4225	32.6742	131.583
30.0762	112.563	30.7381	85.9267
30.4372	89.5	34.7671	75.9403
32.6866	89.2162	34.7513	123.587
36.1971	79.0924	30.1461	84.041
31.1266	82.9954	34.6285	97.3671
35.4051	77.3906	30.7843	88.1986

## Sheet: Fig 2H
Hypercapnic Response (%)
RR		TV		MV
+/+	-/-	+/+	-/-	+/+	-/-
101.722	75.4949	61.3056	57.8953	221.358	174.543
66.14	92.7515	21.6126	59.6727	99.6436	205.897
63.2225	70.4708	38.1899	24.3046	123.621	107.549
69.6141	49.7716	30.3508	57.1361	118.237	134.993
110.571	65.3399	49.3906	155.153	210.983	302.713
101.819	72.721	86.256	61.7476	274.259	179.544
70.2198	65.3335	76.2066	32.947	194.048	118.426
75.7478	83.584	55.4521	94.8436	172.945	255.634
38.7795	72.6059	55.8874	62.8805	118.505	178.779
82.391	78.3607	48.8295	61.0061	166.639	181.176
52.0017	76.9841	43.981	61.5888	118.586	186.505
