# Supplementary material for: Tissue-specific mitochondrial HIGD1C promotes oxygen sensitivity in carotid body chemoreceptors
Source: eLife journal article supplement (doi:10.7554/elife.78915), 2022-10-18
Supplement: supp [file Fig 3-source data 1.xlsx]

## Sheet: Fig 3C
Baseline CSN Activity (AU)
Higd1c+/+	Higd1c-/-
169.265	377.874
320.53	189.219
274.113	186.927
242.483	236.762
224.219	186.119
245.384	210.079
253.675	274.079
	224.113
	222.523
	356.411

## Sheet: Fig 3D
CSN Activity (normalized to activity at t=0)
O2, 80		O2, 60		O2, 40		CO2, 60
+/+	-/-	+/+	-/-	+/+	-/-	+/+	-/-
1.28	1.04	1.51	1.2	2.84	1.34	2.61	1.72
2.24	1.08	2.95	1.18	3.82	1.23	1.47	1.34
1.26	1.17	1.74	1.29	2.69	1.46	2.85	1.78
1.1	1.07	1.41	1.14	2.36	1.21	2.1	1.73
1.43	1.19	2.35	1.33	4.42	1.55	1.89	2.03
1.35	1.14	2.46	1.34	4.39	2.13	2.19	2.58
1.3	1.12	1.65	1.2	2.52	1.39	1.55	1.35
	1.14		1.25		1.8		2.11
	1.21		1.46		2.16		2.35
	1.11		1.3		1.81		1.32

## Sheet: Fig 3G
Peak F/F0
pH 6.8		O2, 50		O2, 25		KCl		CN
+/+	-/-	+/+	-/-	+/+	-/-	+/+	-/-	+/+	-/-
1.05306	1.22687	1.50494	1.55276	4.60078	0.986893	5.52369	4.62757	2.20984	1.10501
1.28123	1.75589	1.35824	1.59375	4.17874	0.957775	6.44365	5.40654	5.09847	1.00528
1.01059	1.28786	5.97217	1.4791	6.06344	0.933061	7.38557	6.52321	4.56231	1.16608
1.01763	1.18252	1.45194	1.39395	5.32564	1.01362	7.48784	5.08078	1.87691	1.27417
2.29091	1.2021	4.01398	1.54138	4.82881	1.02798	7.95956	5.19968	3.90121	5.18009
1.0225	1.09823	3.49453	1.49855	3.34426	1.00102	6.61651	5.60835	5.113	1.24671
1.00838	1.22769	1.40509	1.7067	1.50552	0.877913	4.64973	5.51087	2.12475	1.14052
1.13527	1.34617	1.15419	1.28473	1.29123	0.972862	5.27804	4.85644	2.04614	1.25838
1.18215	1.37419	1.16779	1.48137	2.71506	0.979283	4.97871	5.06896	4.38963	5.76651
0.95098	2.78997	2.41577	1.26488	3.50766	1.01709	4.87584	4.16533	4.07404	4.28461
0.8947	1.28977	1.1907	1.40707	1.36852	1.12368	4.20805	6.07103	1.82316	6.31004
1.00541	1.01605	2.84381	1.51077	4.01615	1.02809	7.74114	5.59351	5.56486	1.19068
0.982859	1.12268	1.155	1.41486	1.08657	1.0508	3.64886	6.33776	1.3564	1.62066
1.2748	3.28203	4.35538	1.45176	5.41557	1.04461	1.03633	6.39329	5.83892	6.7764
1.93874	1.14635	2.82838	1.51391	3.40472	0.981744	3.02263	7.0042	2.11367	2.25654
1.19832	2.04602	1.10002	1.52131	1.17874	1.02715	4.15783	6.83991	3.09477	7.03517
1.04925	5.65245	3.16346	0.642388	3.34711	0.945435	2.96863	0.970865	2.80233	1.14959
3.63005	1.01948	1.04171	1.46706	4.5218	0.993051	6.58896	5.19447	5.78275	6.09265
1.2566	3.04127	2.22296	5.07802	2.08317	4.06307	3.93475	5.26811	1.47627	5.58214
1.12626	3.54542	1.3336	1.43158	1.30134	6.04235	4.63053	6.99038	3.94868	7.61723
1.00279	4.24436	3.24328	2.1526	6.27688	5.70637	7.53155	6.62993	6.19179	7.51459
1.03295	1.22729	1.96089	1.41044	5.83846	1.05554	6.72224	6.05466	5.89283	6.43229
1.03461	1.2167	3.74916	1.30179	5.61455	1.05992	7.49941	5.59841	6.30578	5.59671
2.04656	6.47941	5.00219	1.96938	6.7457	1.57752	8.45428	6.86988	5.97112	9.43459
1.01815	6.25852	2.15311	1.46855	2.16311	6.37874	7.3402	7.1299	6.27701	8.60397
0.984298	4.68388	1.42236	5.6817	5.09756	4.52038	8.2388	7.49459	5.23037	7.63532
2.45994	1.35607	2.64086	0.933693	9.22168	1.93667	11.6869	4.32569	7.66391	3.55778
2.79507	2.01648	1.53788	1.06362	5.44973	2.69735	10.7356	3.05149	8.66116	4.37802
1.03623	1.98628	1.3889	1.27265	4.46296	3.38674	6.43449	3.2319	2.42529	1.92589
1.45343	2.03007	1.39866	1.34852	3.916	1.69946	5.0833	6.79813	4.40176	6.48079
0.960665	5.06894	1.36877	1.12265	3.49295	1.08569	4.89194	5.20521	2.14961	6.79599
0.98353	2.05986	2.03815	5.13652	2.79611	4.49103	5.87235	5.12068	3.22005	5.99628
0.947454	3.51645	1.13024	0.867153	1.26171	2.86049	5.35682	3.65084	1.65046	5.86244
1.0227	1.32361	1.14568	2.11657	3.20695	1.51153	6.70364	3.60228	1.58128	3.66409
1.07617	1.01616	2.52987	1.42133	3.61052	1.04082	5.96264	4.00557	4.36516	1.23563
1.45045	3.66088	2.97028	1.46282	3.97032	3.68688	6.22846	7.99396	4.64939	6.27628
1.07405	2.95153	1.60299	1.35616	1.43721	4.22033	4.57293	6.82461	2.11732	6.14865
1.01294	2.2546	1.18673	1.50332	5.40541	3.82898	8.43745	5.99392	5.93636	5.62865
1.54724	1.42091	1.21698	1.39618	2.37993	2.07132	7.03475	5.04165	2.64483	4.3408
5.04901	2.30189	5.32579	1.25434	5.56063	0.872228	8.11795	5.30962	6.84168	1.47791
1.36285	1.16131	1.164	1.26707	4.53634	0.928211	7.92265	5.16217	6.47707	1.49439
1.11443	2.03261	1.00743	0.935181	1.31078	1.02531	7.72197	4.48382	5.88779	1.46233
1.0563	1.22878	1.07132	1.06457	3.51343	0.928154	7.04037	5.03649	2.39605	1.44585
1.08013	1.51459	1.07844	1.01047	5.1669	1.00854	6.82102	4.9347	2.47674	1.33906
1.02718	1.02881	1.18989	0.833558	2.50618	0.967896	5.55836	5.01813	3.64384	1.92238
1.02465	3.15978	1.42203	1.53314	3.21956	1.00551	6.76003	2.19734	3.31868	1.8608
1.21265	3.52246	1.23426	1.28663	4.10295	0.981057	7.97451	5.9758	6.00274	7.47443
1.07711	1.03402	1.38063	0.909295	3.07318	1.01723	5.91814	5.47695	2.43406	5.90776
1.03181	1.02303	1.21112	1.04228	1.6803	1.01972	6.61455	5.23221	2.4348	5.88161
1.03146	3.52993	1.21854	1.34186	1.36025	4.20904	6.01093	5.85428	1.84868	6.89307
0.921148	1.06325	1.17401	1.21839	1.52727	0.998258	2.89941	6.72886	2.15134	5.60346
1.00444	1.02724	1.18523	1.25109	1.28887	0.984385	5.46016	6.67143	1.89913	6.96587
0.929339	1.0679	1.07989	0.578183	1.19015	0.961205	4.96481	6.40792	3.85029	1.52777
1.01639	1.03826	4.4539	1.34053	4.58618	0.991167	8.18782	3.53228	4.94714	2.41324
1.16308	2.53329	3.71658	1.37998	4.11925	0.998006	5.60137	6.01424	5.18382	5.55205
1.18594	1.63554	1.57332	1.12057	1.82428	1.23279	6.87278	6.65318	2.43804	4.46653
1.57596	5.13136	1.31313	1.33349	4.28946	3.22903	5.30511	8.33982	4.36375	1.24941
1.22044	4.55544	3.60714	1.24106	4.04451	1.20703	9.06487	3.50798	6.05612	1.44378
1.54789	1.416	1.61685	0.674686	3.95189	1.03529	7.67261	5.5909	4.88596	4.86781
1.02905	1.49641	1.25587	0.533579	3.48234	1.25757	5.99071	2.57677	4.00764	2.04121
0.7902	1.15252	5.21314	1.19194	5.30525	1.00982	8.39736	8.27327	5.83876	8.83709
2.38922	5.82216	2.17283	1.37793	3.13356	1.04416	9.8712	7.83032	3.2812	8.65261
1.35608	0.993974	1.20071	1.38185	4.62212	0.99145	8.72113	6.07475	5.63733	1.89147
0.993227	3.46101	1.18953	1.3094	2.25082	0.954524	5.88323	5.10972	4.55397	1.51047
1.11607	2.84936	1.81592	1.24855	3.80024	0.928283	7.28672	5.43835	5.25443	1.44596
1.03906	2.25335	1.21322	1.21179	2.10925	0.95662	5.53269	5.56255	3.52518	1.80518
1.0943	1.04497	4.67756	1.21819	6.14479	0.948707	7.81489	7.00467	6.48198	3.10264
1.10633	1.16841	2.08006	0.960407	3.88387	1.17717	6.68114	6.68094	4.4743	2.23167
0.995399	1.22408	2.15999	0.878483	3.42723	0.940245	6.39251	5.2871	2.99598	1.56994
1.00148	1.13526	1.16415	1.04632	3.60363	3.0117	6.53166	6.06337	5.23101	5.6248
2.36388	1.11942	2.11796	1.16444	2.43968	1.61347	7.97488	4.00406	2.8436	5.42041
4.53076	1.03558	1.35089	1.25227	6.9994	0.951653	8.09666	6.98458	8.60058	1.67765
4.32772	1.08736	1.16187	0.973536	2.62344	0.972203	5.95037	7.31669	6.77317	2.47689
2.17526	1.10165	2.55607	1.17627	2.68334	0.935787	9.57864	5.757	3.51171	2.34796
1.18328	0.999263	1.26993	1.3263	1.18093	1.03801	8.61202	6.78872	2.16487	1.79783
1.90096	1.22469	1.1981	1.14055	1.1946	1.10356	7.86118	4.35297	4.08693	2.80408
1.17592	0.976096	1.52287	1.31989	4.47735	1.15254	7.71384	5.01896	2.43091	2.9568
1.88223	2.56456	7.00043	1.18132	0.790792	0.713102	2.31927	4.12857	2.95632	4.76162
1.80599	2.47044	5.96504	1.19013	3.08905	1.00086	7.20417	7.77105	7.19998	4.95
5.02365	1.02707	7.37053	1.2549	0.902301	1.82722	2.01755	6.37861	2.8044	2.32528
1.13416	1.39554	1.22788	1.17791	1.04796	1.31086	4.61253	8.46968	1.97881	4.85968
1.13999	1.14421	2.49238	1.09959	2.68818	0.976116	6.18774	6.86145	5.46246	2.66438
1.13098	3.64366	0.985299	1.08447	1.33059	0.986672	4.36186	6.3667	2.28489	5.35598
1.18234	2.54061	1.21414	1.7312	5.28953	1.1471	10.2051	4.56316	6.2603	6.53283
1.21789	2.10212	4.05841	2.03187	5.49752	3.61741	8.57689	5.00627	2.3966	7.44515
5.15883	1.71609	3.41031	1.83301	3.73793	3.66516	8.39543	4.1135	2.54927	6.49593
1.44628	1.64662	1.30595	4.70913	1.80417	3.94375	7.51307	6.75532	2.58473	8.40698
4.21847	1.92539	2.18273	3.98338	4.62813	3.97199	8.00594	5.00443	6.83649	8.9423
2.75518	3.09359	3.64474	2.09383	5.26053	2.04667	10.6418	4.52214	7.34791	7.23159
1.91878	1.7487	2.49096	2.57173	3.90953	4.09684	9.80147	4.75726	8.62556	9.56915
2.42613	2.58887	3.53092	3.87973	5.72067	3.26851	5.78282	7.10434	8.33714	6.30521
5.40542	1.00041	6.17577	2.10835	6.35448	1.96682	10.1749	5.99513	6.3572	5.63298
2.25516	2.41568	4.29024	3.29103	3.40457	3.24394	7.92812	5.68595	5.54468	4.37307
2.25381	1.72287	5.47293	2.2815	3.66063	3.7774	7.6817	6.60628	4.05541	5.0715
2.4203	1.86297	2.57572	4.21152	3.05656	3.01903	10.5412	5.57765	5.55551	3.28716
1.17415	1.52928	1.10166	1.74286	1.51934	1.20587	6.66008	5.25792	2.08349	6.69253
1.26456	1.04536	1.28239	1.44198	5.03019	2.52821	7.63563	4.47355	2.13034	2.78483
1.18903	1.60917	6.17443	1.6085	4.07272	3.01123	7.50713	5.78617	5.89502	3.60299
1.1505	0.936612	4.0906	1.95142	2.85908	0.986054	8.05193	2.78368	5.00916	3.25375
1.20681	1.39491	1.23389	2.42518	1.18652	2.39967	8.12678	4.99992	5.27743	5.39965
1.16595	0.93048	1.14168	1.45926	1.20489	2.9176	8.20351	5.825	2.38756	4.08043
5.26247	0.892543	1.40841	1.68196	3.31844	2.42274	7.91246	6.37511	4.84912	3.20304
1.14362	0.828627	0.893425	1.52893	2.57164	1.02848	4.81334	4.56349	2.11569	3.65236
2.66924	0.834596	3.7513	1.40738	3.90156	2.06803	6.99846	4.69166	6.6606	3.43564
1.39	1.37933	1.54501	1.84535	1.33307	3.37657	5.82436	7.1243	2.35086	3.93751
1.07258	0.851098	1.21383	3.4449	1.25608	4.07575	4.63781	7.04663	2.471	8.08874
1.21782	1.0079	1.36727	3.91319	1.9536	3.5875	8.3472	8.19496	2.5716	3.37114
3.01459	0.766291	1.15132	2.16524	3.95386	4.23379	11.4189	7.82484	5.44379	3.24487
2.46216	0.846371	2.48956	3.16034	3.44371	1.2042	6.32096	5.57396	5.23188	4.04046
3.99151	1.05014	4.27685	2.3872	4.7168	1.38003	4.62414	5.49403	9.43062	5.6511
3.25572	1.2104	1.23934	3.40366	3.10176	1.73703	8.33753	4.87041	6.45129	3.01926
1.66386	1.68626	1.32291	3.72705	2.42986	1.31848	7.28686	6.79539	5.37983	3.34488
3.09232	1.01253	1.89604	1.74927	2.46988	1.32349	7.58237	5.15837	5.53445	3.29534
1.84239	0.811868	1.54669	2.17185	1.95373	4.02106	7.88538	6.00147	2.76339	6.48281
2.76912	1.7864	1.28797	5.20348	2.69876	3.32687	9.12922	7.0415	5.69246	3.83963
2.22777	1.85527	1.8079	2.04697	2.29375	2.39529	10.3499	6.80983	5.89469	4.2527
3.04634	0.906974	2.7083	1.52001	4.19275	2.54089	7.94839	5.02219	7.66851	2.9191
2.46925	0.891844	5.92136	1.48764	4.84478	3.92426	10.3087	6.71804	5.82846	5.42377
3.0372	1.03111	4.58471	1.89656	5.01848	1.71888	8.99773	7.05316	6.15553	2.67674
1.22363	0.783525	1.20509	1.75242	1.15275	1.48936	6.64646	5.6265	5.1747	3.65412
2.04829	0.998831	2.20322	1.48825	3.56474	1.63692	6.06334	6.30394	5.13294	4.34354
0.878758	2.62046	1.17841	5.25626	4.52455	4.01411	7.0555	6.42511	1.61016	3.9658
0.864407	1.12612	1.60456	1.93324	3.0629	1.33184	6.23647	7.46064	4.51151	2.6491
0.833971	0.996514	1.16068	1.53457	1.03555	1.68002	6.53818	5.62651	5.3368	4.62909
0.961917	0.837464	1.20276	1.54338	1.13763	1.30569	5.41179	6.03238	1.30979	2.29635
2.44218	0.899522	1.20409	1.49641	2.88607	3.52691	4.12955	7.1008	3.13758	3.91908
2.39907	0.926319	1.14179	1.45452	1.05216	2.93303	4.89527	5.70337	3.394	4.11018
1.02138	0.734189	1.1424	1.49617	1.09578	3.41482	5.24425	6.44393	1.39384	3.44749
0.975726	1.24356	1.21225	1.46558	1.10092	1.26862	3.37728	5.99817	1.55034	3.53668
1.10336	1.12043	1.20841	1.5561	1.23541	1.07672	5.29613	4.92807	1.4217	3.78037
3.41466	0.966715	4.39893	1.53397	5.20661	1.96802	6.40635	5.57505	5.62441	3.76201
1.2744	1.04962	2.60126	1.38017	4.52869	3.05904	7.34551	5.88779	6.49067	4.51583
2.62191	0.871382	2.37486	1.97278	4.16887	1.93629	9.35752	5.92388	7.39947	3.54828
3.23712	0.796725	3.09535	2.19628	4.02836	1.99938	8.92516	6.27593	6.82595	4.16623
1.14462	0.791969	4.65829	2.92519	1.90238	3.44343	9.10788	6.68354	6.70059	4.34245
1.67636	1.00231	2.41055	1.81673	3.2555	4.4102	6.84177	7.7767	5.31175	3.66143
1.13593	1.7039	1.16428	1.25108	1.51741	3.37392	4.79767	6.61927	1.76886	4.02931
2.55303	0.777477	1.22454	3.31248	3.19475	2.3845	4.84218	7.5576	3.27683	5.05737
3.08307	0.676432	1.31133	1.94666	1.19834	2.75557	5.21143	5.49678	1.11098	3.56858
0.998423	0.764784	1.19423	1.42719	1.58585	1.17333	2.77697	3.97132	1.30471	3.00733
1.1381	0.829401	1.19109	1.50368	2.89076	1.39599	4.79925	4.31804	2.34728	2.85726
1.25167	0.800205	1.45041	1.34138	3.3539	1.22861	4.90422	4.5327	2.23436	3.16843
1.91291	0.877286	3.22411	1.37681	2.37603	2.18799	4.96399	4.50361	4.64824	3.04376
1.19126	0.829827	1.75808	1.39001	1.67995	2.19548	4.56071	4.6036	4.05572	3.82202
1.27264	1.11959	1.37312	1.40938	1.34739	2.59919	3.72339	3.81339	2.57142	2.39261
2.40722	0.857437	1.25592	1.50012	2.8593	2.37755	4.90972	4.92839	2.41906	3.36198
1.19585	1.06897	1.11728	1.92679	2.19935	3.22675	4.32478	2.9571	2.02343	3.82584
1.37436	0.991145	1.13314	1.63945	1.20271	2.0312	4.59458	2.79581	2.37021	2.19252
1.37371	0.771402	1.21711	1.47451	1.91292	2.02956	2.91663	4.21903	1.97979	2.94301
1.63005	1.53077	1.17982	1.7818	3.28959	2.64678	5.34043	2.54242	4.61328	2.6389
1.3806	2.87179	1.3276	1.52665	2.19385	2.53291	3.47232	3.56169	2.61324	1.77455
1.35067	1.03165	1.17001	1.30333	3.28279	1.06444	5.80471	2.61484	3.67182	3.77403
1.35541	0.882556	1.26663	1.83102	2.89314	1.03983	7.57161	2.92426	4.59696	3.09902
1.23947	1.69446	1.36709	1.4056	1.05874	1.96219	1.85937	4.40329	1.67283	5.66897
1.19441	1.62479	1.2745	1.31047	2.42429	1.08141	6.15088	4.36646	2.27602	5.75842
1.2899	3.28701	1.63576	1.50331	2.82583	2.76444	7.23986	5.00618	2.79166	6.15907
1.13605	2.28979	1.75803	1.42695	2.59444	2.27839	4.50986	5.98411	3.28524	4.82949
1.29026	2.2266	1.17072	1.41501	4.42201	0.954233	6.3534	4.71689	2.42849	4.76606
1.76376	0.972143	3.64202	1.54657	3.15751	1.01735	5.67239	5.32874	2.64242	3.44965
1.16564	1.00197	1.41605	1.64376	2.45407	1.12131	6.14282	5.95621	2.00379	4.87127
1.23468	1.76973	2.1827	2.31628	2.05601	2.57902	3.64523	4.35351	2.05513	3.2356
1.24907	0.923958	1.36893	1.31685	2.30374	0.989438	5.81731	4.64926	1.93253	3.42762
1.14235	3.66834	1.2374	1.4086	1.05769	1.04528	3.74655	5.60171	1.65608	7.63875
1.16275	1.14319	1.09413	1.33444	0.973649	2.83547	2.92308	5.53449	2.36796	5.69083
3.20014	1.09511	3.84109	1.5715	3.95799	1.44122	7.57081	4.67862	5.69434	3.8796
1.38162	1.06312	1.47168	1.3456	1.36504	1.13037	5.80601	6.0668	4.43915	3.08267
1.35891	0.999575	1.13824	1.44579	2.08538	1.03337	3.35947	2.9995	2.73898	2.92239
1.28027	1.05559	1.33481	1.36464	1.29815	1.11971	5.30351	6.45272	2.86545	3.47213
1.31158	0.965183	1.26653	1.37131	2.53699	2.4656	1.45562	4.78397	2.5247	3.89444
1.29036	0.900651	1.9185	1.3564	2.04558	1.0761	4.95236	6.03264	2.31904	2.92854
1.27286	0.91843	2.71191	1.38492	2.39945	1.00944	4.40274	6.2291	3.13445	2.83542
1.17936	0.964761	2.31709	1.31564	2.27145	1.03122	4.06159	5.5145	3.46235	2.68969
1.28082	0.938715	1.39288	1.27087	2.52113	2.28406	4.48165	6.13134	2.0203	4.54498
1.35772	2.07442	2.7624	1.43724	2.90662	3.81624	5.64061	7.98394	2.56557	6.63881
2.67721	2.02553	3.39875	1.64602	3.25813	3.35021	5.88529	6.30514	2.84039	9.34919
1.47528	1.56193	2.03939	5.81613	2.30528	1.81968	6.05788	5.27428	2.09272	4.9482
1.26412	1.91441	1.27864	1.46416	2.69623	1.09761	4.72952	6.30692	2.04154	3.42591
1.27841	1.29695	3.83234	0.919873	2.46393	2.08385	6.01388	6.8496	1.47847	3.05354
1.32925	2.25922	1.38206	1.40084	1.18845	0.991038	3.02071	4.61887	1.89306	2.89768
1.40726	1.71556	1.34062	1.44934	1.25587	2.30939	3.90444	6.84895	2.89459	6.89261
1.24285	3.0127	1.17408	1.36333	2.70121	3.22324	5.06537	7.1895	3.45105	8.71667
1.26535	1.44708	1.23664	1.46761	1.54078	1.58362	6.89542	6.43468	3.10835	4.48494
1.39057	3.22098	1.10738	1.46475	1.674	1.45166	4.92335	5.67103	2.19416	4.7753
1.37534	1.03653	1.18102	1.43536	1.20234	1.70965	3.38071	5.97276	1.7914	6.82596
1.45163	2.38607	1.15088	1.01972	3.38428	1.10547	4.77394	5.09182	2.28544	4.99085
1.15637	1.99035	2.5149	1.95276	1.37281	1.00448	4.10573	4.63662	4.09687	8.29732
0.989026	1.58107	2.17726	1.33193	3.65824	1.03245	3.45077	6.53207	4.7368	3.5431
1.68293	5.39427	1.40024	1.31888	3.04017	1.90686	7.40072	4.83115	3.1844	11.925
1.43696	4.08937	1.31736	1.34718	3.21889	0.979709	7.87631	6.82126	3.20125	5.03517
3.80759	1.89547	1.30704	1.39065	4.48137	1.47414	6.14644	5.56838	6.11873	8.93351
2.03637	3.66106	1.16797	1.89545	5.02204	2.95327	7.98322	4.72977	3.06067	4.18711
1.137	2.24806	1.19748	1.86651	1.73362	0.510981	4.72333	3.29283	2.74676	12.3908
1.01862	0.967445	1.41586	1.34609	1.68627	0.884529	7.43302	6.79168	3.66502	9.15693
0.825439	2.00157	2.79991	1.32626	8.25251	1.01554	4.07489	4.24579	4.89614	3.2964
1.03847	3.03537	1.23559	1.28091	2.25849	2.57531	4.42512	6.58727	2.8567	11.2359
2.71503	3.70752	1.30058	1.3075	2.30176	1.55544	4.83271	7.07791	3.46889	6.4487
1.42765	4.35566	1.13795	4.36092	5.02321	5.02938	5.37426	7.2283	2.68346	9.09674
1.01701	1.36569	1.17307	1.44304	2.88807	0.975387	3.25157	3.52018	4.00553	4.56142
1.33298	1.4997	1.08794	5.80377	1.19536	0.834487	5.66987	4.51935	2.66463	10.919
3.9227	3.49267	5.64884	2.35965	4.29971	0.869303	2.51867	4.20699	3.56337	4.62921
1.03807	3.55308	1.38181	1.3116	2.87214	1.62554	2.53814	4.56586	6.04423	5.6282
0.852719		5.03573	1.24825	4.89448	0.967304	2.4255	6.79351	5.37527	2.76038
4.76665		4.98194	1.15873	5.8862	0.967237	0.619229	5.57307	5.38433	0.623714
4.06028		4.355	1.53339	4.38873	3.22316	1.10336	3.45925	4.67955	1.85817
0.776427		2.59705	2.19555	4.83434	1.93301	0.640701	3.7683	3.42253	2.23665
2.92598		4.87553	6.15122	3.48185	6.09259	2.11573	1.15628	2.7132	0.833035
3.38357		5.16762	1.33274	5.11238	1.15821	0.701492	3.41789	7.8687	1.57249
2.76218		4.94943	1.16648	3.78125	0.950791	1.60841	6.71579	3.75213	0.665652
1.54332		5.0655	1.19744	3.46177	5.51234	2.48543	6.12446	3.18189	3.43814
0.832296		1.62141	1.24882	1.80225	1.00711	2.18548	8.58727	3.57631	2.33357
1.4788		0.730426	1.25017	1.12974	0.917959	1.36551	6.00013	4.2105	3.01519
0.996947		1.38148	1.06112	3.85471	0.928524	0.47173	5.14531	3.79765	2.58345
1.54732		3.8394	1.11932	4.1101	0.845477	1.10096	4.75248	3.90329	0.636344
1.35194		3.3394	1.16464	3.05976	0.827542	2.0497	2.238	3.01422	0.999683
0.742374		1.20326		2.5425		6.38617		3.66374
1.34615		1.19979		3.89423		7.11728		2.69102
2.0913		1.39455		3.54057		8.51607		3.63484
1.30074		1.39475		3.26857		7.9528		4.093
1.88003		3.19264		4.24188		5.9451		4.4612
2.02379		4.30072		4.17791		7.57674		5.36474
1.82974		1.37787		4.11205		7.325		4.29265
3.1704		1.2655		5.05475		8.12987		2.63709
2.84049		3.31636		6.41398		8.96589		3.51771
2.23824		3.43635		4.76249		7.90131		2.96855
1.11181		1.20008		1.77166		4.51711		2.69096
0.526698		1.22515		0.993578		4.31283		2.99942
2.2789		2.8533		3.01185		8.26844		5.09071
1.70408		1.50394		3.60014		7.7541		4.37853
2.29849		1.25865		4.36633		8.4469		6.9575
2.50096		2.83933		3.29974		5.69819		2.85954
2.84987		3.8587		3.57568		7.47187		6.55056
1.33619		3.04211		3.68412		5.90779		3.70182
0.771614		1.03757		5.46649		4.97532		4.65664
1.58612		2.72302		3.32488		4.80317		3.30373
1.19013		1.21657		1.13202		6.27648		3.08078
1.64455		5.84219		2.20184		1.78041		3.93067
3.52511		4.68712		2.32623		2.70758		2.69862
0.992572		1.165		1.69876		4.26821		2.72389
1.75117		1.18617		3.84729		5.62429		2.35208
1.57895		1.87599		3.23841		5.1238		2.36466
0.936563		1.08026		4.72425		6.02956		2.41184
2.36079		1.18949		3.67092		5.28229		2.43415
1.12173		1.21151		2.24341		5.56821		2.2425
1.52675		2.30792		2.94063		3.80698		2.50871
3.20865		4.15115		2.52268		5.33202		4.70451
2.8725		2.98684		4.61186		6.0978		7.63075
3.54716		4.70602		4.69949		6.93093		7.36472
1.67239		3.49166		6.32227		5.57306		4.02479
1.93167		6.51786		5.68549		6.06391		9.79502
3.57476		5.53651		4.41776		5.79621		8.11704
1.7046		3.18662		5.02464		6.33134		5.23943
2.53677		2.09399		3.80445		4.69972		2.27699
2.17879		3.93217		3.43173		5.22021		2.83804
2.08332		1.81404		3.44357		3.43765		3.30248
1.39535		1.89917		3.04419		1.46265		2.92997
2.34621		2.95828		4.31286		1.79922		4.29892
3.13287		4.29516		4.66387		0.75725		3.42746
1.14431		1.47954		1.49102		4.38467		3.24699
0.957393		2.92596		5.05804		5.10007		2.31051
1.03861		1.6785		2.21894		6.39895		3.03978
2.1493		2.79337		5.22744		2.28591		4.32102
1.70663		3.1807		3.95272		6.02822		2.82721
2.40901		2.06191		5.05979		5.05592		2.90732
0.907347		4.61413		3.85606		5.47357		3.52403
1.32452		4.86197		4.56445		0.839302		4.18581
1.83664		4.59387		4.48758		3.21437		5.23884
2.67042		5.27382		6.29092		2.37969		3.96978
3.78858		5.36443		5.42578		1.86402		3.01802
3.34723		4.82542		0.530613		1.14711		5.72629
1.97194		5.69094		5.06588		0.963165		4.81363
1.66397		4.01588		2.18457		0.71267		5.02073
1.69464		2.99619		2.1918		1.29826		3.05763
0.810716		1.03754		5.33837		0.607283		8.72322
4.59982		3.5558		4.9229		2.16667		4.21729
2.52565		4.04729		4.03802		1.6296		2.53888
1.61233		1.28499		3.52118		5.00417		2.81633
0.896771		1.02513		5.02736		3.58617		7.87751
2.6886		2.22287		4.28976		2.26511		5.34028
1.24158		1.04424		6.42027		2.71844		3.79612
1.78293		4.6477		4.54112		2.52783		3.74388
1.39341		2.81701		3.2429		2.05542		3.86524
3.03697		5.23186		3.17942		1.12758		4.87682
0.851675		1.16001		1.88808		5.54656		2.5
0.963388		1.19886		1.17035		5.78896		3.26776
0.817655		1.12297		2.47172		3.88914		2.56653
1.73869		1.22717		3.53491		5.69108		2.67341
0.850782		1.13595		3.87604		4.69095		2.54059
1.11207		1.12755		1.04071		4.50408		2.28678
1.09539		1.6404		1.31993		5.80089		3.36581
2.2056		1.14126		4.20123		7.25514		2.60379
0.933223		1.20075		3.41614		4.4067		2.57957
0.853999		1.1806		0.93889		6.40038		3.0378
0.795561		1.34732		1.67311		2.48169		2.75646
0.856552		1.18247		3.3949		5.12825		2.55686
0.748846		1.14409		5.31803		6.8436		2.49344
0.726877		1.04928		3.92821		5.36346		2.48642
		3.16549		4.05376		4.33595		2.76085
		2.51368		4.54567		5.30264		3.14534
		3.85874		3.8346		4.522		3.29218
		3.83703		4.48861		4.36515		2.83695
		2.57671		4.37469		6.19591		5.84733
		2.33009		2.88172		6.61931		5.47464
		5.64322		3.60738		5.85791		5.77648
		5.38859		4.68314		7.00505		5.54337
		4.5883		3.23546		6.49179		5.82685
		3.49122		3.56317		5.15229		3.73546
		2.32061		3.20302		4.62228		4.30856
		5.27912		2.59273		4.25899		3.77478
		2.4676		2.68718		3.89032		3.91603
		2.51378		2.29453		4.69641		3.66926
		1.92451		3.38926		4.55671		3.09211
		1.94377		3.16752		2.16627		2.70575

## Sheet: Fig 3H
Mean F/F0
pH 6.8		O2, 50		O2, 25		KCl		CN
+/+	-/-	+/+	-/-	+/+	-/-	+/+	-/-	+/+	-/-
0.84743	0.783001	1.17516	1.37784	1.8167	0.878803	4.29955	4.41212	2.07198	1.07001
0.954719	1.0092	1.19895	1.28996	2.08442	0.881454	4.74026	5.0304	5.02238	0.988079
0.780508	0.814496	1.93443	1.34817	1.94324	0.84994	5.28103	6.19187	2.59749	1.13921
0.87438	0.872854	1.15973	1.28841	1.86222	0.952466	7.28301	4.76976	1.64065	1.20889
1.30741	0.819458	1.65049	1.38511	1.85145	0.934015	7.30395	4.60715	3.03014	2.6211
0.888016	0.822532	1.54123	1.37279	1.55355	0.912013	6.16981	4.92564	4.31103	1.22338
0.811855	0.756629	1.18498	1.44777	1.13483	0.778482	4.30036	5.35817	1.90038	1.06036
0.961613	0.8563	1.07376	1.18915	1.08749	0.840309	3.66062	4.23321	1.71502	1.11522
0.972355	0.610702	1.07104	1.40064	1.36838	0.90118	3.61315	4.61581	3.94541	4.22843
0.837764	1.26547	1.29418	1.1588	1.43846	0.98627	3.31345	3.72608	3.87098	3.96638
0.747005	0.944646	1.12931	1.32106	1.0857	0.97185	3.72212	5.48129	1.7731	5.89198
0.850791	0.777333	1.43913	1.38172	2.03883	0.974451	6.0764	5.25802	5.21716	1.16468
0.831285	0.884098	1.11541	1.31039	1.05459	0.981534	3.36745	5.79254	1.30745	1.56934
0.906835	1.2036	1.70159	1.3551	3.69829	0.941513	0.784176	5.84441	4.68393	6.39597
1.19136	0.91811	1.52349	1.34186	2.44384	0.910288	2.69396	5.82111	1.82428	1.95392
0.996289	1.00254	1.05537	1.34023	1.11932	0.920544	3.74735	6.53378	1.98871	6.74526
0.908229	3.45904	1.47042	0.604171	2.43466	0.867045	2.75772	0.853881	2.38862	0.972255
1.31698	0.732605	1.0243	1.3417	1.62302	0.97387	5.6368	4.46248	3.95785	5.85531
0.910664	1.62846	1.48037	1.96188	1.55261	1.50841	3.69237	4.55591	1.42652	5.29678
0.819491	1.37145	1.20558	1.2942	1.13212	1.84203	4.3182	5.87044	3.21888	7.14027
0.816292	2.00231	1.76393	1.45795	3.23002	1.85338	6.93763	5.5083	4.77623	7.25323
0.813587	0.931006	1.32539	1.27732	3.25471	0.970604	6.28873	5.8908	5.3161	5.76977
0.857711	1.03773	1.64715	1.17528	2.26571	0.980721	7.07676	4.96906	3.80369	4.9863
1.05675	2.79323	1.77239	1.33316	2.11095	1.16994	7.63185	6.12952	4.69771	6.95642
0.855902	1.82743	1.26146	1.21691	1.26529	2.03061	6.28037	6.21497	5.71245	8.13433
0.91073	2.64347	1.14061	2.00366	2.0094	2.08506	7.0102	6.24454	3.59484	6.48131
1.20123	0.805454	1.10733	0.797653	5.08233	1.08317	9.42248	3.66779	6.69536	3.22596
1.28047	0.85944	0.944986	0.808744	2.42334	0.939603	6.7734	2.51394	6.34241	3.65447
0.870462	1.16012	1.1221	1.02473	1.82125	1.8827	4.17432	2.64726	1.93133	1.64728
0.998507	1.13119	1.15877	1.19704	1.58979	1.23668	3.59424	5.86764	3.95655	4.97307
0.810602	1.70787	1.15127	1.03581	1.83748	0.956048	3.58306	4.90809	1.60974	6.0386
0.837239	1.04874	1.25498	1.86943	1.69515	1.53324	4.31273	4.69842	2.83293	5.59018
0.784592	2.26928	1.09685	0.789419	1.13989	1.26398	4.77668	2.98188	1.4556	5.35336
0.934944	0.780769	1.09455	1.46878	1.43864	1.05245	5.50356	3.27255	1.46223	3.62047
0.988756	0.677239	1.36792	1.2832	1.83977	0.961737	5.66571	3.69312	3.46927	1.15331
1.04483	1.286	1.38234	1.30313	1.59144	1.40783	5.59717	7.34427	3.39175	5.96149
0.802984	1.1875	1.26441	1.20295	1.1511	1.59395	3.89291	5.75531	1.84153	5.77974
0.87742	1.16419	1.0535	1.27823	1.87875	1.51842	7.61698	5.14629	3.36044	5.21977
1.02349	0.873916	1.09002	1.25407	1.31244	1.21886	6.52896	4.30683	2.59151	3.67215
2.60389	1.23934	1.84556	1.13756	2.08978	0.837467	6.89644	3.75479	6.38529	1.32021
0.887624	0.997358	1.06199	1.20466	1.66809	0.879397	7.15207	3.55274	3.97135	1.31653
0.877523	1.12638	0.963547	0.864749	1.20808	0.899795	6.9748	3.21228	3.6819	1.34507
0.891857	0.944426	1.00583	0.989483	1.69542	0.887678	4.56438	3.55978	2.15447	1.36075
0.950513	1.0428	1.00509	0.946035	2.26503	0.89613	4.46341	3.5217	1.82519	1.25716
0.871128	0.871138	1.03059	0.776274	1.49777	0.926322	3.75754	4.49099	3.29638	1.79175
0.888112	1.2353	1.11607	1.31422	1.91647	0.982519	5.22453	1.91361	3.22102	1.74647
0.940576	1.25299	1.13052	1.19965	2.22881	0.960435	5.85736	5.07671	5.63635	5.28949
0.915582	0.932293	1.11908	0.8641	1.9114	0.957192	4.43871	4.70149	2.13844	5.56493
0.91588	0.907927	1.13742	0.993673	1.28068	0.977982	5.37548	4.71173	2.17193	5.43025
0.902106	1.6074	1.16149	1.25084	1.12365	1.47866	5.20536	5.21918	1.68897	4.84635
0.770136	0.895538	1.09805	1.16926	1.20279	0.970777	2.84227	5.86355	1.95947	5.0133
0.819279	0.868806	1.11338	1.18586	1.11492	0.947072	5.26078	5.76678	1.75245	6.60171
0.810994	0.989411	1.05804	0.545189	1.12029	0.922642	4.28224	5.64727	3.41435	1.48601
0.832101	0.897652	1.65302	1.28052	2.11854	0.959787	7.51176	3.09154	4.66998	2.29452
0.840538	1.20971	1.53795	1.3237	2.10925	0.973312	5.22996	5.33779	4.46917	5.22291
0.901674	1.22205	1.21789	1.06282	1.37508	1.02217	6.79788	5.84477	2.21734	4.14682
0.917809	2.19993	1.1086	1.29092	2.01491	1.32866	5.10061	7.25672	2.63878	1.08143
0.860435	2.20489	1.58028	1.16779	1.99161	1.00878	7.32203	3.11622	5.55604	1.33859
0.955958	1.1087	1.31335	0.645925	1.83128	0.951121	6.57226	4.84939	3.29195	4.82892
0.848587	1.1293	1.13357	0.476181	1.81095	0.985242	4.33624	2.2483	3.78023	1.8979
0.675315	0.965316	2.01563	1.1195	2.94634	0.963852	6.42132	6.96831	5.39773	8.17849
1.09377	2.42927	1.32726	1.28605	2.12051	0.982953	8.03258	6.72223	3.11783	8.03981
0.939953	0.849819	1.11572	1.27885	2.38725	0.976064	6.95806	5.70505	4.95256	1.66538
0.765779	1.3805	1.12303	1.22251	1.39397	0.913594	4.81306	4.65031	2.56574	1.41432
0.877686	1.26367	1.19139	1.17639	2.41322	0.906884	6.60758	4.85251	4.29079	1.39038
0.811143	1.12273	1.14189	1.1431	1.4313	0.919206	5.16626	5.37499	2.70938	1.64867
0.899797	0.895853	1.84523	1.14063	2.90931	0.914982	7.36446	6.26504	5.6354	2.37761
0.821177	1.00917	1.28595	0.909956	2.11161	1.00031	6.42619	5.78499	3.92206	2.15079
0.783072	1.08714	1.31547	0.827967	2.10763	0.913291	6.11945	4.53566	2.74867	1.52641
0.83113	0.987952	1.09827	0.974878	1.80632	1.25819	6.15928	4.96631	2.98268	3.4453
1.53617	0.995095	1.32272	1.09889	1.78694	1.02819	7.46874	3.34187	2.71509	3.11848
1.72319	0.685171	1.06404	1.17431	3.21138	0.924916	5.40025	6.33957	7.87737	1.53228
2.27098	0.969391	0.956794	0.935618	1.39402	0.95012	4.32228	6.68944	5.60967	2.31611
1.60857	0.93309	1.89985	1.11302	1.77704	0.895815	9.02562	5.09595	3.28038	2.26784
1.05306	0.913482	1.12438	1.25364	1.092	0.961253	7.64272	6.05916	1.86497	1.71483
1.24874	0.98358	1.12068	1.04077	1.05513	0.898545	7.18186	3.81188	3.3277	2.70561
1.06105	0.885325	1.30181	1.18126	1.73076	0.947487	7.59945	4.6506	2.09956	2.32346
1.39284	1.26585	2.85571	1.11572	0.719431	0.650136	2.02687	3.37167	2.38247	3.07098
1.32969	1.24169	2.46025	1.11587	1.42247	0.948536	6.67115	6.39671	6.35729	4.41712
3.41559	0.93657	4.78691	1.16432	0.529059	1.07693	1.83093	6.1536	2.16805	2.1254
1.00117	1.12979	1.14243	1.11205	0.987038	1.01128	4.51271	7.73179	1.71213	4.74698
0.907966	0.955354	1.34464	1.03114	1.65499	0.924492	5.52705	6.54431	3.56954	2.31825
0.953501	1.44112	0.825054	1.0249	0.894016	0.963344	3.93482	5.97346	2.03209	2.88723
0.973872	1.13773	1.07686	1.41769	1.79301	0.981852	9.24841	4.34063	4.67432	6.05446
0.989474	1.15836	1.64052	1.12282	2.13644	1.92717	8.05131	4.77765	2.13826	5.56526
1.9342	1.08113	1.61519	1.23653	1.84221	2.17008	7.85776	3.9074	2.21801	5.98698
1.11205	1.06831	1.14561	2.1099	1.29576	1.99334	7.12029	5.89754	2.2082	7.58513
2.49476	0.855141	1.30216	1.92557	2.59685	1.59956	7.59116	4.57846	6.47721	6.07209
1.7016	1.2122	2.08873	1.4651	3.01922	1.46213	8.79442	4.26594	5.97081	6.7675
1.40474	1.17311	1.85194	1.26711	2.62967	2.44821	8.63789	4.5767	7.25242	7.6369
1.68051	1.07846	2.09052	1.84934	3.07367	1.72344	5.20135	6.25223	7.05106	4.54101
2.77749	0.876246	2.92598	1.47352	3.16516	1.28058	9.1758	5.33362	6.12896	4.12127
1.43962	1.32709	1.94931	1.48982	2.01165	1.98484	7.52367	5.12643	3.92941	3.86129
1.37784	1.0003	2.25419	1.38371	1.98158	2.07719	6.54858	5.91872	2.5554	3.95982
1.68656	1.04366	1.71472	1.77837	1.92329	1.51899	8.65501	5.44666	4.81607	3.10242
0.995672	0.925266	1.02784	1.39702	1.14049	1.14398	5.74431	4.9707	1.92558	4.17274
1.04623	0.790741	1.13128	1.16514	1.69633	1.57389	6.76673	4.22815	1.96034	2.60506
0.940239	0.995452	2.00386	1.2917	1.95644	1.84251	7.19172	5.37987	3.30403	3.24681
0.967379	0.583453	1.99132	1.44431	1.40791	0.888276	7.59994	2.64828	4.64674	2.79912
0.987864	0.745895	1.11296	1.41888	1.03156	1.47978	8.06251	4.65517	4.97746	4.03795
0.984992	0.787592	1.09418	1.30141	1.032	1.58227	7.91563	5.1238	2.06647	3.35663
1.69426	0.768548	1.12209	1.3213	1.65718	1.44577	7.4693	5.79767	3.01191	2.94229
0.931245	0.611858	0.73984	1.31561	1.30561	0.950338	3.51056	4.53669	1.85166	3.26507
1.27534	0.631513	1.50517	1.21636	1.81737	1.40373	4.73498	4.48332	5.91815	2.73781
1.06605	0.884197	1.12554	1.19852	1.11242	1.99859	4.01241	6.6152	2.00755	3.28021
0.868807	0.598075	1.05054	1.70265	1.09871	1.65482	3.42963	6.25319	2.26469	4.60046
1.06417	0.760593	1.18765	1.8362	1.20049	2.15843	5.63236	7.1905	2.24666	2.7867
1.68705	0.666537	0.916419	1.55456	2.01039	1.90362	8.25184	6.90651	4.67919	2.80834
1.83047	0.55659	1.52696	1.60185	2.21389	0.959025	4.4213	5.45047	4.48593	3.35144
1.56037	0.809964	1.48769	1.50399	2.04492	1.11433	3.087	5.07292	8.18629	3.39721
1.97112	0.740079	1.04756	1.72414	1.60569	0.934344	6.21772	4.63696	5.18658	2.47316
1.23847	0.826797	1.09944	1.75007	1.32589	1.10935	5.31327	6.13175	3.68802	2.92672
1.56032	0.693872	1.24093	1.38898	1.72	1.08832	5.84937	5.02683	5.16312	2.9603
1.30617	0.638572	1.21962	1.45417	1.44464	1.88316	5.89613	5.39931	2.65674	3.75786
1.55754	1.21574	1.1832	2.28087	1.70212	1.90233	7.53497	5.04039	5.1097	3.07364
1.31949	1.21065	1.18444	1.51397	1.55022	1.53676	8.11081	5.88709	4.23689	2.8862
1.64863	0.762639	1.50941	1.3563	2.12025	1.57443	6.02094	4.30598	6.15508	2.37712
1.06431	0.78327	1.98906	1.29576	2.06502	1.56815	8.22969	6.04918	5.379	3.48885
1.70766	0.719549	1.7736	1.49957	2.02095	0.965174	7.73345	6.15478	5.72222	2.28758
0.817022	0.615396	1.15935	1.45463	1.02279	1.19297	5.77687	4.99562	2.70559	3.13221
0.92542	0.720071	1.26193	1.28492	1.78002	1.25868	5.49523	5.52629	4.59671	3.02664
0.752056	1.24486	1.13931	2.44456	1.64268	1.56067	6.03346	5.20203	1.39807	2.60106
0.777855	0.751815	1.18096	1.47787	1.63008	1.117	5.4985	5.27009	3.58373	2.22858
0.738133	0.765195	1.11355	1.29263	1.0074	1.16696	5.95162	4.25681	4.90299	3.09002
0.808117	0.729041	1.15245	1.29706	1.03439	1.04004	4.84023	4.53411	1.1679	2.15052
1.64147	0.725072	1.14958	1.24094	1.54909	1.46179	3.02538	4.93983	2.12689	2.97683
1.08038	0.716135	1.10132	1.20192	1.00928	1.4088	3.95023	4.34698	3.34612	2.78189
0.900365	0.62742	1.09739	1.24315	1.01292	1.5542	3.64091	4.49156	1.34876	2.56103
0.836968	0.962589	1.13439	1.29354	1.02239	1.00302	2.65368	3.9807	1.32122	2.90273
0.970334	0.816423	1.15538	1.27773	1.11127	1.00857	4.33475	3.44077	1.31067	2.84301
1.23842	0.730895	1.69953	1.22186	2.69878	1.30552	5.77173	5.38209	5.31113	3.15137
0.931185	0.652945	1.02228	1.20857	1.90028	1.57616	6.48962	4.41778	5.64263	3.29319
1.47993	0.712221	1.5582	1.46309	2.58087	1.36481	7.49118	5.7463	6.45716	2.72338
1.48452	0.490511	1.52422	1.56989	1.97863	1.50993	7.78733	4.75758	5.82334	2.82437
1.00256	0.563387	1.7264	1.46772	1.38732	1.45468	7.98494	6.33436	5.97827	2.95863
1.11464	0.618008	1.73911	0.938065	1.73339	1.8034	6.11365	5.08486	4.46306	2.97116
0.917926	0.831745	1.12899	1.09267	1.08246	1.8531	3.48116	5.4258	1.59233	3.20804
1.09886	0.538607	1.11619	1.66569	1.47478	1.40028	3.58539	6.10433	3.24017	3.57276
1.33059	0.483724	1.21752	1.22245	1.06584	1.30781	3.71054	4.8392	1.07784	2.62836
0.831157	0.555685	1.12921	1.22054	1.10712	1.04002	2.16698	3.67766	1.24472	2.46021
0.860248	0.590257	1.12444	1.27961	1.4127	1.12863	4.60654	3.56428	1.96632	2.34295
0.932862	0.630311	1.21834	1.1254	1.63257	1.07197	4.65886	4.13584	1.92723	2.35165
1.04004	0.570566	1.54512	1.22223	1.26555	1.26068	4.29261	3.39031	4.11851	2.30254
0.962606	0.685228	1.23542	1.2096	1.12343	1.40787	3.93436	3.05536	3.40188	2.9276
0.98984	0.967033	1.18314	1.21168	1.0955	1.74084	3.2419	2.72637	2.33713	2.22331
1.61763	0.463146	1.14905	1.34893	1.85791	1.40442	4.00243	3.38168	2.10022	2.90343
0.853353	0.669501	1.08563	1.41967	1.28851	1.95829	3.83341	2.12881	1.84649	3.18923
1.02372	0.892208	1.10541	1.19754	1.11855	1.25558	4.20481	2.66426	2.28019	1.90027
0.898196	0.533581	1.17032	1.23721	1.40169	1.25472	2.58694	3.03295	1.8612	2.35015
1.41221	0.944725	1.12739	1.38425	2.28085	1.6939	4.8048	1.57681	4.33677	2.51997
1.00548	1.27139	1.28099	1.24426	1.41432	1.38056	3.05571	2.51221	2.27356	1.35334
0.949065	0.695233	1.13	1.09281	2.27959	0.970355	5.35382	1.97139	2.61627	2.51839
0.9526	0.63883	1.2005	1.35243	1.70295	0.845208	6.87488	2.05502	2.90008	2.29983
0.980898	0.990726	1.27455	1.18994	1.03848	0.888564	1.51133	3.6415	1.57826	3.32775
0.864126	0.988303	1.16602	1.16951	1.33123	0.96562	5.47839	3.64915	1.96721	3.4119
0.876052	1.29165	1.28906	1.26614	1.56995	1.16854	6.51534	4.35875	2.43234	4.38643
0.96221	1.11299	1.33969	1.27045	1.70775	1.10026	4.19685	5.06762	2.87163	3.41955
0.898469	1.15758	1.1399	1.24746	1.71507	0.728913	6.00142	4.43378	2.0156	3.51712
1.05742	0.852462	1.69413	1.27633	2.13424	0.919605	5.16197	5.06998	2.54014	2.48851
0.832875	0.861008	1.15745	1.27912	1.39631	0.976978	5.50833	5.46677	1.87267	2.87499
0.901354	0.984633	1.26403	1.44712	1.23465	1.23399	2.99539	4.22351	1.80304	2.4692
0.90252	0.809452	1.14278	1.19877	1.42628	0.966407	5.11419	4.1741	1.58843	2.46376
0.789943	1.33415	1.12419	1.21158	0.981062	0.940225	3.30845	5.22113	1.49336	4.97377
0.775241	0.896105	1.03875	1.16142	0.937169	1.2617	2.59524	4.98222	2.15478	3.90805
1.81873	0.803904	2.10103	1.34303	3.08106	1.03011	5.89132	3.77023	5.53914	2.67812
1.11075	0.882605	1.26005	1.19508	1.17588	1.00223	4.65356	5.55727	3.26585	2.13555
1.04222	0.829013	1.03978	1.21569	1.31016	0.91728	2.97943	2.72211	2.40156	1.99259
0.941334	0.835388	1.1929	1.25053	1.14518	0.991845	4.51912	6.08937	2.39846	2.49083
0.974985	0.875773	1.1799	1.15788	1.7456	1.19003	1.13492	4.59214	2.33559	3.03475
1.10053	0.778442	1.49522	1.2032	1.16431	0.982968	4.42512	5.8623	2.12791	2.04407
0.989332	0.799466	1.45458	1.20846	1.41334	0.948792	3.70374	6.03383	2.72718	2.19934
0.932124	0.795153	1.36322	1.19235	1.52754	0.974145	3.4842	5.17899	2.89048	2.08176
0.955238	0.808499	1.19117	1.13265	1.12044	1.31649	4.01056	5.82388	1.86917	3.99828
1.06628	1.06107	1.89273	1.23487	2.19182	1.50866	5.12791	7.71902	2.22465	4.41875
1.47248	0.78284	1.85361	1.28102	2.66291	1.42015	4.9249	5.8918	2.57461	8.08172
1.1337	0.818605	1.69189	1.95443	1.8405	1.06856	5.03024	4.99875	1.97619	4.03091
0.892047	0.979945	1.17025	1.19855	1.56013	0.935558	4.19266	5.96852	1.69916	2.5365
0.925147	0.746048	1.72862	0.795986	1.41429	1.10256	4.81181	6.58124	1.22188	2.80777
1.01585	1.05053	1.09122	1.14082	1.09633	0.853892	2.30894	4.16976	1.64824	2.20464
1.0044	0.945956	1.16092	1.29716	1.15809	1.13534	3.23073	6.45472	2.21147	5.04497
0.928318	1.21394	1.12595	1.19837	1.33923	1.28178	4.53837	6.89832	2.8253	6.04444
0.985228	0.961928	1.16427	1.2948	1.20641	1.02136	5.79524	5.94419	2.46882	3.59416
1.01961	1.22083	1.08613	1.24599	1.21438	1.10785	4.21829	4.81839	2.0757	3.8499
0.982814	0.866794	1.13188	1.31033	1.09229	1.08513	2.83026	5.29791	1.60156	3.85652
0.945778	1.31684	1.08954	0.920737	1.46835	0.983727	4.28628	4.74343	2.03779	3.75425
0.435642	1.16107	2.12197	1.33672	1.20242	0.744188	2.81988	4.3997	3.02577	6.627
0.416453	1.14301	1.8871	1.16146	1.53876	0.903772	2.92061	6.22343	3.68572	2.75017
0.970752	2.04668	1.32658	1.22474	1.87025	0.757569	5.26385	4.46629	2.97331	10.064
0.808766	1.32613	1.24503	1.20715	1.66493	0.905603	6.61561	6.49264	2.81078	3.74529
1.9085	1.16936	1.25142	1.19659	1.81519	0.999933	4.84034	5.27761	4.15616	5.97165
1.11157	1.33817	1.14367	1.35384	1.77928	1.30303	5.90263	4.38025	2.93651	2.99611
0.732689	1.17173	1.0866	1.27893	1.29894	0.465911	3.48241	3.12557	2.57725	9.51732
0.847618	0.639393	1.30696	1.15865	1.22005	0.836353	6.05584	6.41336	2.90423	6.4106
0.342935	1.1262	2.25682	1.12198	2.55508	0.891468	2.94459	4.0747	3.97796	2.4249
0.810423	1.34375	1.11994	1.10807	1.17348	1.18726	3.85698	6.13062	2.72723	7.16916
0.999817	1.92908	1.25726	1.1862	1.33821	0.998886	3.62388	6.49202	3.12906	4.37896
0.772334	1.73855	1.04842	1.88241	2.09722	1.61121	4.74939	6.6469	2.49097	7.49794
0.697644	1.05122	1.12434	1.23508	1.8012	0.839946	2.57193	3.35517	3.35158	3.06155
0.816173	1.23933	1.05955	1.85856	1.05488	0.754368	4.53455	4.39125	2.51594	7.15277
1.10635	1.36741	1.99781	1.3319	1.52985	0.786078	1.83916	4.06372	3.2594	3.15716
0.696298	1.49239	1.19869	1.08484	1.34119	0.962183	2.2632	4.31095	4.07363	3.7539
0.745427		1.74038	1.1316	2.76919	0.904042	1.96637	6.71742	3.64943	1.99969
1.84888		1.7518	1.07414	4.13419	0.899969	0.602795	5.46246	4.69359	0.559758
1.22101		2.04887	1.16317	2.9976	1.74549	0.880803	3.32171	4.09679	1.62713
0.665464		1.2846	1.44116	3.35181	1.29881	0.480816	3.46389	2.83611	1.13464
1.47085		2.92736	2.6938	3.04465	2.78977	1.81068	0.872284	2.35652	0.76358
1.35124		1.84454	1.1798	3.6742	1.08582	0.596811	3.09546	7.38203	0.925521
1.05175		2.87486	1.1161	2.22442	0.925713	1.22372	6.27511	3.26659	0.639065
0.97504		2.11751	1.13146	1.75428	1.7809	1.982	5.70147	2.70658	2.50348
0.703422		1.32998	1.15675	1.5898	0.964591	1.59294	8.16738	3.0476	1.11788
0.876286		0.597225	1.15245	0.962353	0.889923	1.0645	5.64207	3.41505	1.50589
0.713728		1.13548	1.04084	2.80925	0.902933	0.435544	4.94046	3.21925	1.31846
0.866146		2.50207	1.10971	3.42611	0.804439	1.0451	4.1402	3.27778	0.595583
0.901567		1.49119	1.11212	1.94528	0.761015	1.41412	1.64961	2.57787	0.84095
0.587745		1.13906		1.44143		6.16312		3.11702
0.759607		1.14907		1.93542		5.74345		2.60787
1.09408		1.20182		2.01481		7.09628		3.14831
0.924141		1.1537		1.83768		5.81531		3.0506
1.17856		1.64589		2.29161		5.7361		3.30127
1.11612		2.11661		2.11509		6.59377		4.30439
1.0104		1.18106		1.97066		5.55362		3.19634
1.49607		1.08739		2.12143		5.7934		2.51204
1.47331		1.55276		3.28089		7.27644		3.03224
1.1529		1.40414		2.32023		5.81699		2.7209
0.85009		1.0641		1.16536		4.06417		2.28295
0.401998		1.10389		0.955763		3.76303		2.57005
1.58753		1.75873		2.12299		6.89895		3.76535
1.20844		1.22631		2.07064		5.832		3.41152
1.32818		1.14857		2.98245		5.90116		4.40557
1.31143		1.31839		1.53318		4.21916		2.69931
1.37726		2.05479		2.4452		6.57938		5.24146
1.00996		1.46888		2.27029		5.50351		3.2904
0.675843		0.991075		3.21523		4.83624		4.36074
0.912774		1.48937		1.81518		4.30238		3.07294
0.821285		1.10787		0.952969		4.86773		2.67585
1.0718		2.61339		1.66736		1.62806		3.65379
1.59706		1.69972		0.799503		2.02321		2.54912
0.797452		1.12319		1.225		3.43654		2.58639
0.925854		1.08679		2.32337		5.11534		2.27765
0.84765		1.30068		1.73548		4.56447		2.19742
0.776481		1.06106		2.13781		5.02394		2.29202
0.991516		1.10338		1.97656		4.94427		2.25492
0.80967		1.05736		1.6849		4.59173		2.03724
0.854046		1.26291		1.69861		3.42119		2.2963
1.12008		1.6311		1.35923		4.44557		3.53124
1.49165		1.56307		3.06754		4.69047		5.61896
2.12456		2.11323		3.66995		6.24343		6.02307
0.977318		1.49991		2.72195		4.6832		3.2584
1.17046		3.06482		4.21426		4.89369		9.5936
1.60069		1.86053		2.3881		5.11633		7.29206
1.17485		1.59509		2.45657		5.60061		4.87219
1.25614		1.61593		2.42927		4.00234		2.04306
1.53876		2.1125		1.77069		4.63138		2.06985
0.978397		1.4282		2.09143		2.68711		3.10578
1.00305		1.52569		2.79258		1.20908		2.70464
1.53272		1.58542		2.86199		1.53833		3.80658
1.84282		2.01577		3.12622		0.714974		2.93436
0.816225		1.16682		1.26809		3.40709		2.71763
0.742053		1.39376		3.47608		4.36731		2.16736
0.732193		1.25654		1.46172		5.50192		2.76842
1.01869		1.39037		3.7333		1.91367		3.75493
1.12909		1.53583		2.80003		5.48062		2.48512
1.04542		1.27457		2.20482		4.77964		2.76212
0.856814		1.69164		2.45811		5.26294		3.20393
1.02973		1.7192		3.26831		0.712225		3.84968
1.10379		1.74873		2.19513		2.78768		4.13829
1.42926		1.80724		3.38906		2.00574		3.50421
1.74914		1.92953		3.25568		1.54908		2.68018
2.10537		2.45634		0.444216		1.10248		4.71457
1.15743		3.41866		3.67312		0.801876		4.15626
1.47303		2.54522		1.62954		0.686904		4.25067
0.839015		1.51007		1.65608		1.08118		2.82906
0.762285		1.00327		3.11505		0.560278		8.08434
1.43743		1.45014		1.90471		1.85236		3.7421
1.05032		1.55638		2.58545		1.28571		2.23097
0.888634		1.07608		1.64592		4.49628		2.58294
0.815227		1.00449		3.62579		2.63632		5.79111
1.35148		1.23643		2.99772		1.78654		3.43473
0.979959		0.970367		2.22925		2.58742		3.21816
1.13105		1.64136		2.42711		2.13853		3.38813
0.915118		1.67805		2.65361		1.87894		3.30559
1.59693		1.96013		2.62925		1.05066		4.08424
0.718122		1.13193		1.14112		4.66991		2.33411
0.715585		1.14868		1.03344		5.56998		2.69028
0.681972		1.07191		1.26207		3.27752		2.31153
0.834829		1.14758		1.39041		5.00456		2.45722
0.696662		1.09741		1.52478		4.10519		2.18506
0.725153		1.05379		0.980333		4.19866		2.18986
0.799635		1.25604		1.01983		5.17486		2.83692
1.00068		1.10699		2.50474		6.74776		2.47343
0.67298		1.13741		1.32399		4.0654		2.29071
0.661311		1.11849		0.906034		5.43192		2.74351
0.712875		1.11164		1.24404		1.83134		2.55705
0.747082		1.14842		1.77647		4.30589		2.49082
0.587336		1.10415		2.83534		6.25321		2.15826
0.675534		1.00128		1.6753		4.621		2.16446
		1.67453		1.91591		4.19329		2.69456
		1.30334		2.54269		4.91502		3.13072
		2.32476		2.46842		3.86389		3.19862
		2.13193		2.82395		4.07448		2.70317
		1.81059		2.70609		4.9374		5.29171
		1.57523		1.93545		5.56912		5.23746
		2.17906		2.30671		5.11916		5.52076
		2.08205		2.48121		5.9636		5.10541
		1.95487		2.11094		5.26346		5.52766
		1.70284		1.61695		4.57462		2.17592
		1.81756		1.53026		4.35693		2.73106
		2.21464		1.53102		3.86294		3.38967
		1.25435		1.39064		3.6263		3.71427
		1.34731		1.23507		4.41335		3.42268
		1.50356		1.57883		4.33316		2.79171
		1.17781		1.42628		2.04857		2.601
