# Supplementary material for: Tissue-specific mitochondrial HIGD1C promotes oxygen sensitivity in carotid body chemoreceptors
Source: eLife journal article supplement (doi:10.7554/elife.78915), 2022-10-18
Supplement: supp [file Fig 4-fig supplement 1-source data 1.xlsx]

## Sheet: Fig 4-S1A
PO2 (mmHg) at time (s)							Higd1c+/+							Higd1c-/-
23	69	114	159	204	249		F/F0 at time (s)							F/F0 at time (s)
643.896	175.908	40.7729	24.2805	15.0906	9.8966		23	69	114	159	204	249		23	69	114	159	204	249
677.973	113.089	26.1675	18.3273	15.1029	13.562		0.983607	0.990385	1.06339	1.08198	1.09955	1.13105		1.04643	1.03734	1.03957	1.09052	1.09706	1.07243
682.864	98.5205	30.2801	22.7069	22.4084	19.7484		0.952333	0.962887	1.02402	1.04389	1.09642	1.11388		1.02989	1.02232	1.02239	1.05533	1.05831	1.04026
588.547	73.9699	17.5829	11.7637	9.59117	8.2762		0.980872	1.00938	1.00903	1.0543	1.12525	1.14903		1.04025	1.04646	1.04334	1.04839	1.06168	1.04495
566.183	76.7361	23.4152	15.5676	13.7982	11.574		0.974235	0.974495	1.03807	1.04635	1.10873	1.11071		1.01491	1.03382	1.03824	1.02904	1.04893	1.04704
							0.992928	0.981057	1.00601	1.03935	1.08131	1.11282		1.00515	1.04334	1.04908	1.04667	1.06171	1.06775
							0.977599	0.987506	1.01431	1.07462	1.09923	1.12554		1.03701	1.0536	1.05347	1.05191	1.06472	1.08835
							0.974934	1.00283	1.02262	1.05651	1.13413	1.13576		1.01789	1.01439	1.0367	1.06589	1.04135	1.03414
							0.965249	0.93447	1.013	1.00343	1.01298	1.05932		1.04601	1.06007	1.07565	1.07522	1.05851	1.06785
							0.957063	0.950203	0.975003	1.0402	1.07208	1.09209		1.0367	1.05361	1.04709	1.06421	1.05022	1.07357
							0.99745	0.963856	1.0175	1.03757	1.06527	1.13395		1.01374	1.05783	1.04939	1.04506	1.04237	1.05888
							0.979525	0.978796	1.02764	1.05059	1.12908	1.13738		1.01454	0.993484	0.979287	1.00743	0.979115	1.009
							0.97216	0.962643	1.02133	1.02052	1.06911	1.08854		0.9981	1.01181	1.00846	1.02663	1.01982	1.01723
							0.951754	0.936931	0.975843	0.986557	1.01413	1.04432		1.03676	1.07855	1.12087	1.08179	1.0641	1.04533
							0.926279	0.872965	0.968034	0.932688	0.975298	0.989444		1.03032	1.02411	1.03791	1.07402	1.08016	1.04968
							0.949915	1.00961	0.881756	1.00953	1.04482	1.06549		1.01948	1.01796	1.05389	1.05781	1.05121	1.04618
							0.946836	0.973465	0.984076	1.00576	1.03825	1.06814		0.990368	1.02339	1.03665	1.03627	1.04239	1.03436
							0.962922	0.978949	0.965387	1.0153	1.04262	1.06597		1.02146	1.05207	1.08096	1.09172	1.08766	1.07852
							0.939027	0.955736	0.984282	1.02811	1.05534	1.08769		0.999549	1.0137	1.04712	1.04224	1.04866	1.04905
							0.957493	0.971828	0.987598	1.02556	1.05703	1.09028		1.01509	1.04924	1.0778	1.07229	1.05875	1.08746
							0.957157	0.968646	0.983569	1.02351	1.05504	1.05499		1.01505	1.06819	1.09743	1.08437	1.04281	1.10414
							0.981345	0.98258	1.01548	1.04784	1.07065	1.10031		1.02336	1.06923	1.09017	1.07138	1.07564	1.08327
							1.00592	0.968624	1.0045	1.03059	1.05928	1.09267		1.03055	1.05543	1.10718	1.08696	1.09984	1.11889
							0.994431	0.991416	1.0158	1.03131	1.08345	1.08575		1.00466	1.02226	1.04044	1.05807	1.06498	1.06799
							0.986534	1.01231	1.01221	1.09202	1.15676	1.16846		1.02841	1.05891	1.03493	1.09773	1.09131	1.11189
							0.995904	0.988088	1.08562	1.06349	1.06288	1.10589		1.03064	1.03005	1.04827	1.09033	1.11186	1.12292
							1.01765	1.05581	1.04135	1.08837	1.10389	1.1504		1.0372	1.07983	1.0956	1.07966	1.07072	1.12398
							0.955156	0.995011	1.05101	1.03054	1.05816	1.08978		1.01021	1.04719	1.06212	1.08168	1.08883	1.11847
							0.975905	0.999106	0.996877	1.0509	1.08348	1.11282		1.01611	1.04178	1.05688	1.05262	1.06579	1.09912
							0.98164	0.980504	1.03888	1.05094	1.07935	1.13134		0.999435	1.02012	1.06171	1.08152	1.10073	1.07909
							0.96804	0.953687	1.01238	1.02738	1.04521	1.06594		1.00903	0.996482	1.04122	1.06284	1.0674	1.1049
							0.997519	0.970697	0.985706	1.04293	1.08803	1.09065		1.01775	1.06639	1.08262	1.06783	1.06663	1.07134
							0.987547	0.990287	0.996888	1.06922	1.11162	1.11356		1.00241	1.04915	1.06608	1.04732	1.04661	1.05999
							0.981381	0.989549	1.06261	1.0691	1.12257	1.13355		1.01129	1.03991	1.05041	1.07421	1.07161	1.08495
							1.01368	1.01692	1.06634	1.03486	1.07605	1.07321		0.983278	1.04913	1.03138	1.04761	1.04836	1.06673
							1.02607	1.03723	1.01391	1.08256	1.13586	1.14722		1.00752	1.05414	1.09263	1.0769	1.07775	1.08935
							0.946824	0.967019	1.07686	1.03042	1.07708	1.08466		0.978334	1.00213	1.02804	1.04146	1.04955	1.06107
							0.955224	0.977588	0.98478	1.06495	1.08838	1.11416		0.969656	1.03348	1.02741	1.0348	1.03164	1.06903
							0.968366	1.00251	1.01933	1.0879	1.10176	1.12615		0.981516	1.03744	1.04922	1.06231	1.06109	1.09346
							0.948706	0.990544	1.03828	1.09803	1.10383	1.14273		0.966379	1.03253	1.02545	1.03102	1.02185	1.06593
							0.976199	1.00031	1.02303	1.08512	1.09836	1.11549		0.989512	1.0271	1.06127	1.0543	1.06912	1.07924
							0.9921	1.01288	1.03889	1.04998	1.09736	1.11627		1.00687	1.02915	1.08002	1.06883	1.07565	1.1109
							0.986677	0.973608	1.03864	1.02338	1.0498	1.06131		0.955047	1.01451	1.04107	1.0613	1.08013	1.09639
							0.98175	0.979605	0.984613	1.03821	1.06784	1.10022		0.9886	1.03718	1.04036	1.05643	1.05675	1.09715
							0.952074	0.957911	1.0067	1.02218	1.06913	1.08351		0.988213	1.01059	1.02598	1.01561	1.03468	1.01389
							0.973143	0.997746	0.997029	1.01088	1.02561	1.05475		0.993111	1.0084	1.03353	1.02699	1.04527	1.07
							0.963203	0.978013	0.983582	1.02781	1.05317	1.05518		0.992304	1.05168	1.06852	1.07393	1.05911	1.10647
							0.982642	0.987828	1.01337	1.02286	1.04427	1.06561		0.990231	1.01273	0.998463	1.01025	1.03615	1.03101
							0.963717	0.981206	1.00064	1.01893	1.036	1.05716		0.997781	1.05199	1.05246	1.06534	1.0679	1.08833
							0.937157	0.926645	1.01466	0.965832	1.00741	1.02401		0.945162	1.00591	1.00155	1.04388	1.01658	1.05995
							0.955531	0.975902	0.900167	1.02084	1.07428	1.08764		0.97494	1.022	1.01159	1.03934	1.04613	1.02883
							0.96645	0.98587	1.00731	1.03093	1.04452	1.04101		1.01066	1.03191	1.04532	1.06186	1.05929	1.06112
							0.974452	0.99234	0.967997	1.03161	1.05737	1.0755		1.02379	1.11114	1.14119	1.12917	1.10582	1.11175
							0.962231	0.953243	0.98799	1.0134	1.0315	1.05631		0.964101	1.01389	1.02666	1.0556	1.06579	1.08015
							0.987733	0.969097	0.975721	1.01818	1.04833	1.03191		0.996681	1.01311	1.0435	1.07169	1.08364	1.10035
							0.975498	0.948292	0.980877	0.998446	1.03404	1.05927		0.955445	1.02911	1.02926	1.04849	1.0332	1.05092
							0.931485	0.929192	0.989694	1.00585	1.02778	1.05612		0.978529	1.00075	1.02045	1.02903	1.04494	1.06476
							0.950972	0.971148	0.976094	1.00222	1.04865	1.06694		0.973016	1.02143	1.04436	1.0514	1.07712	1.10434
							0.963502	0.94296	0.996391	0.974958	1.00119	1.01703		0.9811	1.03021	1.05326	1.06056	1.05655	1.07161
							0.945405	0.948234	0.931554	0.978942	0.991161	1.01768		0.981606	1.02948	1.04811	1.0473	1.05747	1.05851
							0.950869	0.983493	0.977503	1.02504	1.07232	1.08773		0.986827	0.994971	0.994136	1.03663	1.06339	1.065
							0.944135	0.947737	1.0178	0.979467	1.01186	1.03225		0.965426	1.00623	1.02446	1.03434	1.03346	1.06527
							0.965584	0.964202	0.922806	1.01415	1.04121	1.05546		1.01494	1.04384	1.05537	1.09122	1.0823	1.1553
							0.983426	0.992022	0.989281	1.04174	1.05877	1.09351		0.971333	0.970315	0.990925	0.984518	1.0078	1.03285
							0.956379	0.952271	1.00663	1.03574	1.10392	1.08912		0.964725	1.06295	1.04774	1.05878	1.01717	1.0719
							0.939419	0.941423	1.01844	0.992654	0.996957	1.02634		1.01567	1.04384	1.03353	1.05234	1.02681	1.04142
							1.02888	1.05248	0.952127	1.1063	1.10573	1.10807		0.993231	1.05772	1.0463	1.05066	1.06595	1.05362
							0.996361	1.00422	1.06812	1.02571	1.03113	1.0306		0.988935	1.0551	1.06691	1.05043	1.09329	1.09468
							1.01748	1.042	1.01187	1.0923	1.09726	1.08258		0.971598	1.06845	1.05934	1.13012	1.05757	1.13002
							1.00614	1.00883	1.04703	1.08353	1.12944	1.16079		0.979448	1.06023	1.06146	1.11118	1.0672	1.11801
							1.02519	1.03263	1.04951	1.14233	1.14393	1.15573		0.989637	1.04704	1.0647	1.07777	1.09769	1.13795
							1.0003	1.06529	1.09017	1.12811	1.14937	1.20222		0.936261	1.02077	0.990167	1.04174	1.03044	1.0436
							0.991862	0.996243	1.1066	1.03051	1.04543	1.06716		0.981779	1.0548	1.05214	1.10043	1.06834	1.12469
							0.997396	1.01408	1.01783	1.0328	1.04507	1.05115		0.986517	1.04555	1.05228	1.06622	1.06658	1.07733
							0.99523	1.00699	1.02667	1.03633	1.03664	1.03277		0.96899	1.02011	1.0463	1.04844	1.08163	1.09207
							0.987626	0.992186	1.01717	1.04402	1.04633	1.07976		0.986086	1.02038	1.05362	1.05438	1.08166	1.10382
							0.971071	0.959223	1.01588	1.01321	1.02697	1.06476		0.957676	1.03296	1.04381	1.04387	1.06048	1.07471
							0.964768	0.990187	0.975593	1.02324	1.03478	1.05133		0.952974	1.02404	1.01107	1.03439	1.03175	1.06144
							0.978716	0.973068	1.01336	1.00213	1.0167	1.00848		0.972399	1.01388	1.05884	1.05305	1.05648	1.09716
							0.978919	0.998669	0.980053	1.05421	1.06995	1.07999		0.96747	1.00867	1.04188	1.04473	1.07367	1.0917
							0.973239	1.00117	0.99693	1.02065	1.0292	1.02822		0.986013	1.01589	1.04438	1.03297	1.05368	1.06973
							1.02828	1.03373	1.02287	1.05396	1.04916	1.05274		0.958958	0.979212	0.984725	0.995995	1.01964	1.02303
							1.01448	1.03208	1.05245	1.0327	1.06267	1.03803		0.967623	1.03026	1.05251	1.07853	1.06952	1.13759
							1.01741	1.0167	1.04973	1.05216	1.03072	1.02791		0.985474	1.03719	1.07582	1.06218	1.06066	1.08218
							1.0218	1.05641	1.03875	1.08105	1.07021	1.08021		1.0118	0.995221	1.00817	1.01382	1.04532	1.05023
							0.973525	0.996474	1.07083	1.0488	1.04918	1.06033		0.991434	1.01356	1.05224	1.06023	1.05489	1.07483
							1.03541	1.04403	1.0417	1.09986	1.08356	1.07975		0.982274	0.986729	1.01317	1.0334	1.03209	1.04835
							1.00016	1.02192	1.12618	1.06137	1.07343	1.11048		1.01858	1.02004	1.0005	1.00369	1.0055	0.98608
							1.07676	1.12178	1.05797	1.26197	1.2892	1.31738		1.02158	1.00018	1.02004	0.985168	0.96744	0.957829
							0.996051	1.01068	1.1655	1.08531	1.08538	1.14358		1.01018	1.0231	1.01945	1.01235	1.01981	1.01587
							1.01382	1.01486	1.03463	1.01871	1.04654	1.04424		1.012	1.04798	1.00075	1.02327	1.02399	1.02772
							0.984149	0.994154	1.01507	1.01219	0.998155	1.00599		1.00837	1.01259	1.01222	1.01759	1.00035	1.00038
							1.02371	1.06688	1.01113	1.16638	1.15755	1.20621		1.01173	1.01554	1.00838	1.00761	0.989647	0.949103
							1.03075	1.05142	1.11656	1.14988	1.14275	1.17301		1.00569	1.03518	0.999019	1.01182	1.00993	0.989547
							0.981169	0.974586	1.08513	1.03297	1.06787	1.10991		1.00234	1.01449	1.02997	1.04262	1.04314	1.04488
							0.99237	0.988601	0.999505	1.08606	1.11057	1.18923		1.0037	1.00619	0.99814	1.0017	0.986298	0.997095
							1.01048	1.01567	1.01574	1.10557	1.1108	1.11733		0.999766	1.00723	0.98689	1.0101	0.982535	0.965885
							0.974496	0.950184	1.05112	0.969077	1.0094	1.04492		1.01034	0.997748	1.01871	0.991431	0.997074	0.996941
							0.993418	1.0013	0.951288	1.0542	1.07183	1.05982		1.00651	1.01768	1.00793	0.990595	1.01236	1.01484
							1.00357	0.986532	1.03126	1.03865	1.06353	1.07764		0.983613	0.986258	1.00317	0.981189	0.992499	0.981591
							1.01407	1.08312	1.01545	1.12061	1.13661	1.14382		0.991495	1.00481	1.00907	1.01509	1.00764	0.984673
							0.98838	1.01117	1.10052	1.07233	1.08165	1.08188		0.983379	0.983939	0.990396	0.987578	1.00801	0.997073
							1.00574	1.01029	1.03068	1.05393	1.08327	1.07997		1.00531	0.99842	1.01946	0.998122	1.00545	1.02736
							0.995417	1.01542	1.02847	1.04695	1.07226	1.05983		0.993275	1.00629	0.994036	0.99274	0.978541	0.987784
							0.999685	1.05567	1.02878	1.08236	1.11433	1.11103		1.00496	1.00857	0.995945	0.959292	0.973173	0.974556
							0.983799	1.03361	1.07804	1.06319	1.07104	1.08496		1.00866	0.987907	0.958086	0.93864	0.955605	0.960738
							0.991963	0.996146	1.05624	1.0453	1.07841	1.09083		0.984928	1.00326	0.991926	0.981495	1.01345	1.01397
							1.01585	1.01456	1.03269	1.0943	1.08279	1.0968		1.00277	0.998723	0.962741	0.971609	0.995995	0.996958
							1.04919	1.05962	1.03753	1.11843	1.12398	1.12106		0.99201	1.01528	0.96768	0.972226	0.992445	1.02309
							1.00056	1.02336	1.09558	1.06478	1.07395	1.0331		1.01345	1.03423	1.00462	0.995159	0.982636	0.957155
							1.00921	1.03239	1.05284	1.09647	1.09664	1.08584		0.978664	0.962061	0.959338	0.970541	0.983386	0.987252
							0.978534	1.01376	1.06905	0.992795	1.00303	1.05871		1.02595	1.00581	1.00824	0.990051	0.990662	0.969528
							0.967199	1.00785	1.00752	1.06719	1.08476	1.09563		1.00477	1.00062	1.00598	0.979067	0.984578	1.00066
							1.00637	1.03229	1.06133	1.07996	1.08239	1.10318		0.979156	0.987729	0.966557	0.969769	0.988866	1.00221
							0.965525	0.97352	1.08737	1.03258	1.02739	1.01202		0.978559	0.984788	0.951094	0.964371	0.975691	0.945306
							0.954948	0.999284	1.0095	1.03086	1.04444	1.0176		0.998767	0.993332	0.999746	0.982792	0.988222	0.973224
							1.02888	1.05248	1.01991	1.1063	1.10573	1.10807		0.978518	0.969235	0.977035	0.975234	0.962798	0.965931
							0.996361	1.00422	1.06812	1.02571	1.03113	1.0306		1.0056	0.993302	0.986497	0.985562	0.977896	0.983939
							1.01748	1.042	1.01187	1.0923	1.09726	1.08258		0.992176	1.00055	1.00761	1.00297	1.01394	1.01133
							1.00614	1.00883	1.04703	1.08353	1.12944	1.16079		0.996857	1.00971	1.00965	1.02079	1.0341	1.03686
							1.02519	1.03263	1.04951	1.14233	1.14393	1.15573		0.997769	1.00475	1.02528	1.03701	1.03462	1.03416
							1.0003	1.06529	1.09017	1.12811	1.14937	1.20222		1.01832	1.03039	1.01112	0.973252	0.986346	0.988001
							0.991862	0.996243	1.1066	1.03051	1.04543	1.06716		0.993486	0.998379	0.986577	0.989538	1.00985	1.00031
							0.997396	1.01408	1.01783	1.0328	1.04507	1.05115		0.99398	1.00873	0.997246	0.979069	0.99768	1.00825
							0.99523	1.00699	1.02667	1.03633	1.03664	1.03277		1.01203	1.01215	0.987654	0.957878	0.979315	0.96633
							0.987626	0.992186	1.01717	1.04402	1.04633	1.07976		0.992582	0.995829	0.980442	0.954177	0.95626	0.972868
							0.971071	0.959223	1.01588	1.01321	1.02697	1.06476		1.00183	0.999236	0.998316	0.99517	1.01146	1.00251
							0.964768	0.990187	0.975593	1.02324	1.03478	1.05133		1.00323	1.00248	1.00237	1.01126	1.02612	1.04622
							0.978716	0.973068	1.01336	1.00213	1.0167	1.00848		0.991434	0.984261	0.97553	0.970436	0.993636	1.0097
							0.978919	0.998669	0.980053	1.05421	1.06995	1.07999		0.989531	1.00531	0.986679	0.989129	1.01182	1.02153
							0.973239	1.00117	0.99693	1.02065	1.0292	1.02822		0.994791	1.01082	0.989285	0.986102	1.01174	1.01447
							1.02828	1.03373	1.02287	1.05396	1.04916	1.05274		0.958908	0.966168	0.961926	0.963534	0.975127	0.995231
							1.01448	1.03208	1.05245	1.0327	1.06267	1.03803		1.00046	1.00617	0.99977	0.999506	1.01357	1.00675
							1.01741	1.0167	1.04973	1.05216	1.03072	1.02791		0.978407	0.965828	0.969935	0.971983	0.974741	0.992719
							1.0218	1.05641	1.03875	1.08105	1.07021	1.08021		1.00849	1.00462	0.997053	0.965464	0.951459	0.942639
							0.973525	0.996474	1.07083	1.0488	1.04918	1.06033		0.989696	0.995785	0.974956	0.987058	0.998068	1.01894
							1.03541	1.04403	1.0417	1.09986	1.08356	1.07975		0.998349	1.0074	0.997105	0.991142	1.01412	1.01415
							1.00016	1.02192	1.12618	1.06137	1.07343	1.11048		1.00634	1.01824	1.0243	1.02993	1.10285	1.01137
							1.07676	1.12178	1.05797	1.26197	1.2892	1.31738		1.01422	1.00136	0.986281	0.990088	0.981745	0.989622
							0.996051	1.01068	1.1655	1.08531	1.08538	1.14358		1.00043	0.978119	0.996356	0.990631	1.00123	0.99612
							1.01382	1.01486	1.03463	1.01871	1.04654	1.04424		1.00695	0.981678	0.986001	0.979316	1.01098	1.01752
							0.984149	0.994154	1.01507	1.01219	0.998155	1.00599		0.992683	0.991702	0.980707	1.00655	1.02773	1.01355
							1.02371	1.06688	1.01113	1.16638	1.15755	1.20621		1.00956	0.999866	0.993226	0.991145	1.02382	1.01028
							1.03075	1.05142	1.11656	1.14988	1.14275	1.17301		0.997257	0.990604	0.98325	0.968662	0.954992	0.954961
							0.981169	0.974586	1.08513	1.03297	1.06787	1.10991		1.01095	1.00163	0.994802	0.993367	1.02588	1.01436
							0.99237	0.988601	0.999505	1.08606	1.11057	1.18923		0.9988	0.998315	0.995107	1.00767	1.02817	1.01428
							1.01048	1.01567	1.01574	1.10557	1.1108	1.11733		1.02209	1.01763	0.985433	0.982794	1.0073	0.951202
							0.974496	0.950184	1.05112	0.969077	1.0094	1.04492		1.00989	1.02241	1.01011	1.01216	1.04162	1.00685
							0.993418	1.0013	0.951288	1.0542	1.07183	1.05982		1.03895	1.01002	1.00274	1.00835	1.01513	1.01413
							1.00357	0.986532	1.03126	1.03865	1.06353	1.07764		1.00808	0.999537	1.01412	1.02686	1.03661	1.0207
							1.01407	1.08312	1.01545	1.12061	1.13661	1.14382		1.00173	1.00407	1.00345	1.00036	1.00127	0.985861
							0.98838	1.01117	1.10052	1.07233	1.08165	1.08188		1.01266	0.976136	0.965798	0.982621	1.0097	0.990997
							1.00574	1.01029	1.03068	1.05393	1.08327	1.07997		1.01507	1.01445	1.02436	1.02335	1.04254	1.02875
							0.995417	1.01542	1.02847	1.04695	1.07226	1.05983		0.995438	0.9927	0.999609	1.00779	1.01349	1.00159
							0.999685	1.05567	1.02878	1.08236	1.11433	1.11103		1.04166	1.02755	1.04109	1.01368	1.01549	1.0078
							0.983799	1.03361	1.07804	1.06319	1.07104	1.08496		1.02063	1.01591	1.03239	1.02461	1.0339	1.03945
							0.991963	0.996146	1.05624	1.0453	1.07841	1.09083		0.997758	0.993506	1.00327	1.00424	1.01857	1.01935
							1.01585	1.01456	1.03269	1.0943	1.08279	1.0968		0.992845	1.00343	1.01686	1.0002	1.02206	1.02682
							1.04919	1.05962	1.03753	1.11843	1.12398	1.12106		1.04921	1.04855	1.0706	1.03384	1.02934	0.997402
							1.00056	1.02336	1.09558	1.06478	1.07395	1.0331		1.02018	0.99906	1.01761	0.999222	1.00266	1.00826
							1.00921	1.03239	1.05284	1.09647	1.09664	1.08584		1.00907	1.00903	1.02102	1.02491	1.03872	1.03306
							0.978534	1.01376	1.06905	0.992795	1.00303	1.05871		0.999707	1.00735	1.00745	1.00472	1.00799	1.00765
							0.967199	1.00785	1.00752	1.06719	1.08476	1.09563		1.02013	1.01341	1.00183	0.999549	1.00839	1.00013
							1.00637	1.03229	1.06133	1.07996	1.08239	1.10318		1.00639	0.989536	0.993294	1.0073	1.01283	1.00973
							0.965525	0.97352	1.08737	1.03258	1.02739	1.01202		0.998868	0.98539	1.01026	1.01244	1.02623	1.01163
							0.954948	0.999284	1.0095	1.03086	1.04444	1.0176		1.02192	1.00762	1.01804	1.00979	1.01788	1.04781
							1.04683	1.04858	1.01991	1.05145	1.11455	1.14425		0.996761	0.998162	1.01837	1.02305	1.02479	1.02007
							0.994799	0.986557	1.03712	0.976269	0.992128	1.0073		1.01192	0.998657	1.0385	1.02649	1.04043	1.03297
							1.00368	1.01523	0.971182	1.04109	1.07017	1.05095		1.00882	0.998579	1.02454	1.0014	1.01287	1.01466
							1.01542	1.01084	1.03919	1.00231	1.03754	1.03344		1.01165	1.0235	1.05094	1.03212	1.04153	1.03248
							1.02018	1.03203	1.01222	1.03705	1.06927	1.10409		1.01852	0.998679	1.00963	1.00553	1.01045	0.995014
							1.00559	1.01129	1.01474	1.00194	1.02563	1.08842		1.01677	1.01369	1.00904	0.9983	1.01576	1.00222
							1.00786	1.01191	0.984095	0.999984	1.01931	1.03016		1.0009	0.99415	0.98115	0.989834	0.994724	0.996433
							1.00462	1.03192	1.00133	1.04353	1.12722	1.13693		1.03567	1.03174	1.04756	1.01854	1.04856	1.02143
							1.0334	1.08775	1.04051	1.1068	1.15866	1.19191		1.00996	1.00636	1.00767	0.988315	0.992618	0.988546
							0.989711	0.980978	1.13759	0.97393	1.0038	1.00526		0.975857	0.978035	0.99507	0.964576	0.989979	0.990885
							0.995287	1.01485	0.978737	0.999164	1.02574	1.02699		0.991031	0.985973	0.988406	0.992474	0.990375	0.985893
							1.02238	1.04968	1.0026	1.06746	1.07727	1.08356		1.00782	1.00677	1.02684	1.02162	1.02281	1.00878
							1.01427	1.02573	1.06543	1.04396	1.02669	1.04687		0.984606	0.985334	1.00995	1.02303	1.03446	1.03414
							1.01895	1.03414	1.03745	1.02324	1.0491	1.04954		0.988593	0.990553	1.01291	0.99143	0.994763	0.981171
							0.983834	0.975311	1.01725	0.99703	0.980385	0.979677		1.00621	1.01519	0.985018	0.972934	0.980721	0.955414
							0.984013	0.992848	0.97835	0.988429	1.00239	0.999325		1.00432	0.999942	0.988771	0.962549	0.947237	0.940555
							0.986826	0.978144	0.982375	0.962411	0.990827	0.991966		0.997647	0.969661	0.982204	0.957833	0.977903	0.968964
							0.99445	1.00167	0.974462	0.987712	0.980609	0.991791		0.98503	0.976979	0.972937	0.979409	1.00317	1.01868
							1.02304	1.02335	0.985875	1.03998	1.02815	1.03444		1.01727	0.990893	0.992004	0.963066	0.983055	1.00425
							1.0101	1.01967	1.0208	1.00675	1.02665	1.02924		1.00664	1.0035	1.01465	1.00141	1.02009	1.02316
							1.00089	1.01599	1.00151	1.00085	0.991486	1.00991		1.01011	1.00967	0.996137	0.986163	1.00509	1.0048
							1.02548	1.03162	1.00075	1.02445	1.04184	1.02598		0.99207	0.969312	0.97276	0.940978	0.98049	0.956856
							1.00532	1.03518	1.04061	1.05372	1.09179	1.12987		0.97675	0.994874	0.993087	1.01124	1.02739	1.03753
							0.992674	0.991547	1.03892	1.01227	1.00125	1.04645		0.962645	0.967149	0.948498	0.966696	1.00206	1.01189
							0.988258	1.03053	0.999313	1.0363	1.08814	1.11641		0.9517	0.974456	0.966932	0.988963	1.03338	1.05092
							0.997414	1.04808	1.03336	1.06351	1.12437	1.13619		0.996756	0.991515	0.98606	0.976566	0.978927	0.962822
							1.03294	1.04037	1.04767	1.11379	1.18391	1.18787		1.03049	0.992071	0.994893	0.96803	0.968891	0.939438
							0.976881	0.981633	1.0682	1.0183	1.04807	1.08833		0.997542	0.996485	1.00099	0.993062	1.0064	1.00437
							0.993425	1.04428	1.00334	1.04719	1.13265	1.15111		0.999259	1.00243	1.01287	0.992575	1.0027	1.00389
							0.999169	1.03825	1.08485	1.06617	1.13827	1.15802		0.979371	0.997599	0.9709	0.966638	0.991155	0.986673
							0.979342	1.02823	1.06573	1.08234	1.1812	1.19097		1.00361	1.00708	0.98473	0.989	0.97534	0.966135
							0.989161	1.00715	1.04938	1.02732	1.02541	1.05606		1.00028	1.018	1.01859	1.02636	1.0288	1.03137
							0.952949	0.958854	1.01913	0.945182	0.938316	0.969822		0.97222	1.06317	0.945053	0.948063	0.947508	0.944557
							0.982081	1.00343	0.936875	1.04299	1.07066	1.07883		1.04578	1.06429	1.06702	1.0246	1.02683	0.990142
							0.996164	1.03326	1.00888	1.06624	1.1049	1.11317		1.02062	1.05288	1.12959	1.05676	1.01325	1.00966
							0.991059	1.04676	1.04704	1.11813	1.13246	1.16885		1.03186	1.08403	0.993039	1.0006	1.00436	0.991845
							0.998761	0.996573	1.06228	1.01768	1.03045	1.03508		0.921022	0.981823	0.893326	0.905174	0.882469	0.904469
							0.99769	1.02318	1.01539	1.03533	1.04043	1.05513		0.971922	0.973419	0.970858	0.941356	0.940003	0.920442
							0.980878	1.00201	1.01605	1.01934	1.04191	1.0319		0.974174	1.01819	1.01315	0.989618	0.973535	0.965171
							0.973059	0.970274	1.0004	0.969863	0.971295	0.980688		0.990581	1.01675	0.881448	0.908106	0.924572	0.928937
							0.982393	0.995974	0.972433	1.04644	1.06385	1.10413		0.984655	1.04026	0.967818	0.939389	0.944311	0.965488
							0.975466	1.01402	0.9934	1.02212	1.03662	1.03874		0.945323	1.05144	0.909213	0.900529	0.925232	0.933684
							0.994675	1.0064	1.0152	1.04691	1.03564	1.0612		1.00186	0.988214	1.07589	1.0116	0.995819	0.996915
							0.981807	0.998964	1.04048	1.04238	1.02474	1.05749		0.884044	0.965728	0.653842	0.784218	0.846233	0.853939
							0.96223	1.00333	1.00105	1.03464	1.09162	1.12777		0.984378	1.15546	0.881079	0.939586	0.954541	0.956824
							1.00125	1.0069	1.00169	1.07286	1.07062	1.09347		0.980592	1.0483	1.10987	1.00989	1.00617	1.00011
							0.972337	1.00781	1.01627	1.03934	1.06801	1.0616		0.992135	0.990861	0.934877	0.952777	0.961337	0.968762
							0.990128	0.999667	0.995936	1.01304	1.00852	1.02436		1.01119	1.03843	1.04602	1.04649	1.02885	1.04237
							0.985019	0.989887	1.00401	1.00456	1.01918	1.03022		1.01645	1.01619	1.11172	1.0731	1.03844	1.04807
							0.958104	1.01516	0.986176	1.04969	1.11184	1.18123		0.936074	0.95349	0.860004	0.929232	0.943348	0.958285
							0.992448	1.00337	1.01636	1.0253	1.04031	1.04467		0.967876	0.955869	1.05427	1.02393	0.998226	0.979682
							1.01083	1.01563	0.998836	1.04982	1.0541	1.07349		0.97384	1.03749	1.00075	0.961992	0.942393	0.959873
							0.999764	0.997907	1.01434	1.04732	1.02479	1.06962		0.988798	1.04559	1.09559	1.00713	0.96881	0.964543
							0.987172	0.987924	1.03422	0.994896	0.995033	1.00345		1.01375	1.08104	1.02089	0.99125	0.970967	0.959939
							0.987918	0.992704	0.991815	0.995377	0.998752	1.00972		1.01937	1.07103	0.963424	0.954023	0.955214	0.971731
							1.00213	1.0138	1.00514	1.02924	1.0242	1.03611		1.0032	1.05781	0.948891	0.931613	0.953618	0.953618
							0.968351	0.992666	1.01582	0.998433	0.997754	1.01695		0.968189	0.980199	1.01246	0.951132	0.949078	0.940203
							0.967141	0.957564	0.986361	0.948522	0.961304	0.976808		0.985791	1.00132	1.00863	0.947823	0.960364	0.958194
							0.992854	0.999903	0.954623	0.992047	1.01115	1.01902		1.01082	1.07245	0.955652	0.954375	0.968351	0.957527
							0.996107	1.00265	1.01028	1.00638	1.02197	1.02232		1.00952	1.02811	1.11135	1.05345	1.02189	1.00477
							1.00301	1.03546	1.00803	1.03968	1.06349	1.06049		0.969702	0.997946	1.06867	1.0058	0.977233	0.963783
							0.991523	1.0106	1.02189	1.03337	1.03768	1.03303		0.983744	0.990986	1.08865	1.05114	1.02167	1.01844
							0.980288	0.968011	1.02086	0.991629	0.996901	1.00156		0.975409	1.00113	1.07193	1.0089	0.980702	0.974709
							0.988455	1.00097	0.982216	1.02577	1.01146	1.02237		0.981813	0.985185	0.935166	0.941444	0.936643	0.925746
							0.975529	1.00921	1.003	1.06425	1.04943	1.07579		0.956639	0.962911	0.916158	0.940514	0.918067	0.905159
							0.98586	0.99987	1.02259	1.01722	1.01807	1.02008		0.98605	1.08928	1.05075	1.03332	0.998379	1.00939
							0.96129	0.962538	1.01555	0.949238	0.936286	0.949179		1.02846	1.09701	1.01773	1.01785	1.02703	0.991563
							1.0193	1.03639	0.953033	1.05113	1.07888	1.07232		0.980404	1.0048	1.01613	0.968673	0.963461	0.950503
							1.0054	1.01352	1.06372	1.02543	1.03774	1.03771		1.00553	1.02942	0.834002	0.869965	0.944244	0.932957
							1.00859	1.01975	1.01003	1.01127	1.02563	1.04099		0.926546	0.938964	0.931476	0.934625	0.917167	0.89834
							0.977552	0.980088	1.00238	0.985782	0.959045	0.978195		0.962042	1.01443	0.975237	0.943872	0.955946	0.941216
							0.98838	1.00181	0.976347	0.974454	0.972565	0.970106		0.935857	0.970094	0.981628	0.983786	0.953437	0.935129
							1.00382	1.04305	0.969584	1.11795	1.18625	1.18792		0.978858	1.01126	0.987665	0.962123	0.96022	0.968857
							1.01189	1.02219	1.06658	1.03727	1.03707	1.04181		1.01747	1.06609	1.09578	1.02303	1.01711	1.00325
							0.994227	1.01719	1.01567	1.01868	1.04461	1.03714		0.959382	0.959445	0.955626	0.932183	0.936928	0.92411
							0.992294	1.01064	1.01326	0.991398	1.00677	1.01885		0.991284	0.973954	1.0957	1.00918	0.970606	0.960154
							0.967551	1.00828	0.981574	1.02295	1.06729	1.07322		0.983108	0.966811	0.961985	0.945193	0.959245	0.923202
							0.996972	1.01513	1.01954	1.05931	1.06549	1.03793		0.936192	0.922817	0.909898	0.921764	0.924209	0.900311
							0.991556	0.991169	1.03512	1.01094	1.02339	1.04068		0.953484	0.941707	0.922858	0.907485	0.907466	0.897643
							0.987684	0.99666	1.00646	1.00898	1.03179	1.07624		0.92036	0.922347	0.896422	0.932506	0.903053	0.907762
							0.9839	1.00912	1.0005	1.00555	1.00047	1.01404		0.978867	1.00615	1.01166	0.982232	1.00283	0.95815
							0.991553	1.00313	1.00557	1.00724	0.997319	1.01786		0.98467	0.981598	1.03851	1.00602	0.98177	0.972036
							0.978881	0.9709	0.994458	0.978367	0.976365	0.992272		0.979393	1.00026	1.03909	0.983173	0.974777	0.957005
							0.98415	0.997599	0.977134	1.0222	1.02199	1.03615		0.937651	0.942526	0.929148	0.947407	0.912883	0.920063
							0.959798	0.965651	1.00075	0.981336	0.996818	0.99481		0.976174	0.976351	0.962453	0.965997	0.949296	0.951885
							0.979214	0.991191	0.970616	0.983805	0.995383	1.00891		0.986846	0.998293	1.00151	1.01661	1.01193	1.00458
							0.982155	0.981343	0.982246	0.97121	0.967598	0.97723		0.970878	1.02072	0.896993	0.929456	0.947216	0.956204
							0.984682	0.990124	0.968936	0.990859	1.00378	0.987289		1.00381	1.04253	1.09282	1.04361	1.03004	1.00629
							0.984977	1.00791	0.972469	0.991602	1.00162	1.01227		1.0032	1.05747	1.08176	1.0427	1.01455	1.00638
							0.989268	0.990065	0.994858	1.00553	0.994058	1.0015		1.00156	1.04666	1.13966	1.07507	1.02217	1.01552
							0.983861	1.02317	0.99316	1.01543	1.02715	1.04333		1.01071	1.06749	1.1435	1.07744	1.02767	1.00814
							0.969624	0.980857	1.00407	0.994732	1.01	0.995822		0.940226	0.963352	0.852553	0.886188	0.901354	0.930157
							0.99873	0.994434	0.981465	0.986824	0.996646	1.00629		0.951364	0.935676	0.966264	0.956018	0.946482	0.936117
							0.997402	1.00392	1.00461	1.02482	1.04191	1.03258		0.945714	0.954629	1.0504	0.998186	0.973658	0.962582
							1.00066	1.03356	1.01138	1.04302	1.08114	1.11827		1.05047	1.29829	1.45233	1.30764	1.17882	1.16775
							0.99564	1.01175	1.07337	1.05947	1.106	1.1556		0.999542	1.22839	1.30731	1.18013	1.09987	1.09297
							0.994359	1.00795	1.05135	1.05194	1.09057	1.10858		0.979201	0.988491	1.06086	1.01941	0.956614	0.964226
							0.985603	0.987777	1.02645	0.996859	0.996304	1.00103		0.953976	0.949227	1.14583	1.03166	0.968548	0.936887
							1.00012	1.00092	0.990242	1.00141	1.00617	1.02125		0.979815	1.01416	0.866406	0.883366	0.909846	0.897012
							0.984065	1.01354	0.993279	1.01202	1.01139	1.02756		0.980882	1.00658	1.09404	1.06433	1.014	1.01655
							0.9829	1.00615	1.0015	1.01538	1.02961	1.0245		0.970328	0.978971	1.02523	0.97567	0.954774	0.937859
							0.987615	1.00571	1.01431	1.00741	1.04187	1.03689		0.940419	0.923322	0.937549	0.910877	0.919117	0.917319
							0.994314	0.985033	1.00845	1.01014	0.998614	1.0153		0.905343	0.925651	0.931947	0.897181	0.885661	0.884534
							0.98119	1.00182	0.995454	1.00065	1.01676	1.02245		0.94184	0.946543	1.09601	1.00197	0.942061	0.95565
							0.981221	1.00053	1.00661	1.01006	1.02106	1.02969		0.944881	0.964271	1.00458	0.979532	0.947347	0.955376
							0.973647	1.08303	1.01397	1.03305	1.10067	1.14488		0.940194	0.928407	1.01547	0.990504	0.96387	0.967478
							0.990201	0.986985	1.0261	0.999261	0.992603	1.01057		1.02825	1.07527	1.05914	1.01773	1.01058	0.980115
							1.0048	1.01557	0.991936	1.02001	1.03537	1.03641		0.964894	1.02006	1.02498	0.972445	0.96808	0.961674
							1.00652	1.06114	1.00904	1.0676	1.09098	1.10756		0.932667	0.956917	1.01365	0.959454	0.92454	0.922287
							0.98049	0.998993	1.06997	0.999731	1.00995	1.02474		0.972782	0.972799	1.05913	0.992498	0.92779	0.940338
							1.00078	1.01218	0.995783	1.04546	1.02018	1.03254		0.980045	0.968084	0.989932	0.954874	0.933392	0.933671
							1.01316	1.05041	1.01613	1.10517	1.14025	1.15819		0.955387	0.999173	1.0634	1.02997	0.974333	0.973604
							0.981411	1.00042	1.08787	1.04056	1.05688	1.10887		0.991067	1.03478	1.11131	1.03189	1.00381	0.984798
							1.0006	1.0276	1.00814	1.08998	1.14956	1.13698		0.985301	1.0336	1.10427	1.03126	1.0128	0.995623
							0.968574	0.996762	1.04463	0.992213	1.01938	1.03922		0.970673	1.01874	1.08813	1.02054	1.00524	0.973943
							0.979268	1.07003	1.00354	1.10303	1.09684	1.15439		0.956927	0.953968	1.0127	0.943228	0.940042	0.939061
							0.981796	1.01615	1.1113	1.08436	1.10779	1.13789		0.954128	0.935802	0.992655	0.960569	0.932625	0.924167
							0.98209	1.04974	1.05013	1.10178	1.07619	1.11093		0.938566	0.885506	0.802388	0.849719	0.896362	0.914687
							0.990278	1.01069	1.05915	1.01642	1.02154	1.01439		0.962599	0.951414	0.847235	0.901263	0.973825	0.962112
							1.01144	1.04211	0.999863	1.04575	1.09791	1.10803		0.963018	0.988519	1.07451	1.00651	0.98498	0.948771
							0.968603	0.972507	1.05498	0.948956	0.985611	0.972191		0.960793	0.958506	0.97201	0.9511	0.935635	0.925761
							0.972001	1.01124	0.962518	1.00181	1.04071	1.0303		0.978088	0.959307	0.979608	0.982818	0.962711	0.939105
							0.988181	1.00208	1.00595	1.02279	1.02769	1.03612		0.987985	0.979722	1.0042	1.00377	0.955265	0.957376
							0.991035	0.993681	1.00808	1.00584	1.01734	1.01862		0.982042	0.995624	0.974655	0.945067	0.960267	0.943739
							0.983071	1.01049	1.00981	1.01276	0.994766	1.00292		0.985403	1.00421	1.02901	1.00855	1.00201	0.967281
							0.995811	0.983482	0.987998	0.997318	0.98454	0.979628		0.964149	0.946744	0.963063	0.951081	0.927734	0.921447
														0.968852	0.982442	0.993803	0.952158	0.962897	0.969359
														1.00817	0.950009	0.914624	0.922085	0.925874	0.922156
														0.978367	0.996046	1.01134	0.975748	0.966959	0.946146
														0.94342	0.96138	0.98378	0.971978	0.94406	0.919693
														0.979693	0.971279	0.978586	0.965168	0.970208	0.925555
														0.944531	0.96064	0.997126	0.97295	0.94124	0.914754
														0.961188	0.953693	0.93408	0.917462	0.920398	0.907157
														0.992592	1.0228	1.11084	1.04662	1.00845	1.00505
														0.941344	0.983769	1.02466	0.972104	0.946607	0.944353
														0.936722	0.964495	1.06248	0.998206	0.944255	0.92954
														0.954909	0.940774	0.937112	0.918205	0.929555	0.906052
														1.01354	0.989851	1.04792	0.980015	0.992595	0.967427
														1.00185	0.955322	0.906138	0.898493	0.916348	0.913261
														0.972148	0.943372	0.920438	0.895958	0.899581	0.898808
														0.927631	0.935191	0.927549	0.902162	0.904636	0.889198
														1.02096	0.963148	0.849733	0.841473	0.901636	0.930756
														0.995698	0.999818	0.975203	0.96958	0.968209	0.962359
														0.941708	0.979171	1.00457	0.967998	0.96704	0.917358
														0.93673	1.01358	0.994505	0.977706	0.960108	0.952059
														0.978192	1.00836	1.07882	1.01895	0.98257	0.973706
														1.01188	1.05455	1.01897	1.01013	1.01033	0.988479

## Sheet: Fig 4-S1B
PO2 (mmHg) at time (s)							Higd1c+/+							Higd1c-/-
23	69	114	159	204	249		F/F0 at time (s)							F/F0 at time (s)
643.896	175.908	40.7729	24.2805	15.0906	9.8966		23	69	114	159	204	249		23	69	114	159	204	249
677.973	113.089	26.1675	18.3273	15.1029	13.562		0.952333	0.962887	1.02402	1.04389	1.09642	1.11388		1.04643	1.03734	1.03957	1.09052	1.09706	1.07243
682.864	98.5205	30.2801	22.7069	22.4084	19.7484		0.926279	0.872965	0.968034	0.932688	0.975298	0.989444		1.02989	1.02232	1.02239	1.05533	1.05831	1.04026
588.547	73.9699	17.5829	11.7637	9.59117	8.2762		0.949915	1.00961	0.881756	1.00953	1.04482	1.06549		1.04025	1.04646	1.04334	1.04839	1.06168	1.04495
566.183	76.7361	23.4152	15.5676	13.7982	11.574		0.986534	1.01231	1.01221	1.09202	1.15676	1.16846		1.01491	1.03382	1.03824	1.02904	1.04893	1.04704
							0.955156	0.995011	1.05101	1.03054	1.05816	1.08978		1.00515	1.04334	1.04908	1.04667	1.06171	1.06775
							0.975905	0.999106	0.996877	1.0509	1.08348	1.11282		1.03701	1.0536	1.05347	1.05191	1.06472	1.08835
							0.98164	0.980504	1.03888	1.05094	1.07935	1.13134		1.01789	1.01439	1.0367	1.06589	1.04135	1.03414
							0.96804	0.953687	1.01238	1.02738	1.04521	1.06594		1.04601	1.06007	1.07565	1.07522	1.05851	1.06785
							0.987547	0.990287	0.996888	1.06922	1.11162	1.11356		1.0367	1.05361	1.04709	1.06421	1.05022	1.07357
							0.981381	0.989549	1.06261	1.0691	1.12257	1.13355		1.01374	1.05783	1.04939	1.04506	1.04237	1.05888
							0.9921	1.01288	1.03889	1.04998	1.09736	1.11627		1.01454	0.993484	0.979287	1.00743	0.979115	1.009
							0.973143	0.997746	0.997029	1.01088	1.02561	1.05475		0.9981	1.01181	1.00846	1.02663	1.01982	1.01723
							0.931485	0.929192	0.989694	1.00585	1.02778	1.05612		1.01948	1.01796	1.05389	1.05781	1.05121	1.04618
							1.00614	1.00883	1.04703	1.08353	1.12944	1.16079		0.990368	1.02339	1.03665	1.03627	1.04239	1.03436
							1.02519	1.03263	1.04951	1.14233	1.14393	1.15573		1.02146	1.05207	1.08096	1.09172	1.08766	1.07852
							1.0003	1.06529	1.09017	1.12811	1.14937	1.20222		0.999549	1.0137	1.04712	1.04224	1.04866	1.04905
							0.971071	0.959223	1.01588	1.01321	1.02697	1.06476		1.01509	1.04924	1.0778	1.07229	1.05875	1.08746
							0.973525	0.996474	1.07083	1.0488	1.04918	1.06033		1.01505	1.06819	1.09743	1.08437	1.04281	1.10414
							1.03541	1.04403	1.0417	1.09986	1.08356	1.07975		1.02336	1.06923	1.09017	1.07138	1.07564	1.08327
							1.07676	1.12178	1.05797	1.26197	1.2892	1.31738		1.03055	1.05543	1.10718	1.08696	1.09984	1.11889
							0.996051	1.01068	1.1655	1.08531	1.08538	1.14358		1.00466	1.02226	1.04044	1.05807	1.06498	1.06799
							1.02371	1.06688	1.01113	1.16638	1.15755	1.20621		1.02841	1.05891	1.03493	1.09773	1.09131	1.11189
							1.03075	1.05142	1.11656	1.14988	1.14275	1.17301		1.03064	1.03005	1.04827	1.09033	1.11186	1.12292
							0.981169	0.974586	1.08513	1.03297	1.06787	1.10991		1.0372	1.07983	1.0956	1.07966	1.07072	1.12398
							0.99237	0.988601	0.999505	1.08606	1.11057	1.18923		1.01021	1.04719	1.06212	1.08168	1.08883	1.11847
							0.974496	0.950184	1.05112	0.969077	1.0094	1.04492		1.01611	1.04178	1.05688	1.05262	1.06579	1.09912
							1.00614	1.00883	1.04703	1.08353	1.12944	1.16079		0.999435	1.02012	1.06171	1.08152	1.10073	1.07909
							1.02519	1.03263	1.04951	1.14233	1.14393	1.15573		1.00903	0.996482	1.04122	1.06284	1.0674	1.1049
							1.0003	1.06529	1.09017	1.12811	1.14937	1.20222		1.01775	1.06639	1.08262	1.06783	1.06663	1.07134
							0.971071	0.959223	1.01588	1.01321	1.02697	1.06476		1.00241	1.04915	1.06608	1.04732	1.04661	1.05999
							0.973525	0.996474	1.07083	1.0488	1.04918	1.06033		1.01129	1.03991	1.05041	1.07421	1.07161	1.08495
							1.03541	1.04403	1.0417	1.09986	1.08356	1.07975		0.983278	1.04913	1.03138	1.04761	1.04836	1.06673
							1.07676	1.12178	1.05797	1.26197	1.2892	1.31738		1.00752	1.05414	1.09263	1.0769	1.07775	1.08935
							0.996051	1.01068	1.1655	1.08531	1.08538	1.14358		0.978334	1.00213	1.02804	1.04146	1.04955	1.06107
							1.02371	1.06688	1.01113	1.16638	1.15755	1.20621		0.969656	1.03348	1.02741	1.0348	1.03164	1.06903
							1.03075	1.05142	1.11656	1.14988	1.14275	1.17301		0.981516	1.03744	1.04922	1.06231	1.06109	1.09346
							0.981169	0.974586	1.08513	1.03297	1.06787	1.10991		0.966379	1.03253	1.02545	1.03102	1.02185	1.06593
							0.99237	0.988601	0.999505	1.08606	1.11057	1.18923		0.989512	1.0271	1.06127	1.0543	1.06912	1.07924
							0.974496	0.950184	1.05112	0.969077	1.0094	1.04492		1.00687	1.02915	1.08002	1.06883	1.07565	1.1109
							1.04683	1.04858	1.01991	1.05145	1.11455	1.14425		0.955047	1.01451	1.04107	1.0613	1.08013	1.09639
							0.994799	0.986557	1.03712	0.976269	0.992128	1.0073		0.9886	1.03718	1.04036	1.05643	1.05675	1.09715
							1.02018	1.03203	1.01222	1.03705	1.06927	1.10409		0.988213	1.01059	1.02598	1.01561	1.03468	1.01389
							1.00559	1.01129	1.01474	1.00194	1.02563	1.08842		0.993111	1.0084	1.03353	1.02699	1.04527	1.07
							1.00462	1.03192	1.00133	1.04353	1.12722	1.13693		0.992304	1.05168	1.06852	1.07393	1.05911	1.10647
							1.0334	1.08775	1.04051	1.1068	1.15866	1.19191		0.990231	1.01273	0.998463	1.01025	1.03615	1.03101
							0.989711	0.980978	1.13759	0.97393	1.0038	1.00526		0.997781	1.05199	1.05246	1.06534	1.0679	1.08833
							1.00532	1.03518	1.04061	1.05372	1.09179	1.12987		0.945162	1.00591	1.00155	1.04388	1.01658	1.05995
							0.992674	0.991547	1.03892	1.01227	1.00125	1.04645		0.97494	1.022	1.01159	1.03934	1.04613	1.02883
							0.988258	1.03053	0.999313	1.0363	1.08814	1.11641		1.01066	1.03191	1.04532	1.06186	1.05929	1.06112
							0.997414	1.04808	1.03336	1.06351	1.12437	1.13619		1.02379	1.11114	1.14119	1.12917	1.10582	1.11175
							1.03294	1.04037	1.04767	1.11379	1.18391	1.18787		0.964101	1.01389	1.02666	1.0556	1.06579	1.08015
							0.976881	0.981633	1.0682	1.0183	1.04807	1.08833		0.996681	1.01311	1.0435	1.07169	1.08364	1.10035
							0.993425	1.04428	1.00334	1.04719	1.13265	1.15111		0.955445	1.02911	1.02926	1.04849	1.0332	1.05092
							0.999169	1.03825	1.08485	1.06617	1.13827	1.15802		0.978529	1.00075	1.02045	1.02903	1.04494	1.06476
							0.979342	1.02823	1.06573	1.08234	1.1812	1.19097		0.973016	1.02143	1.04436	1.0514	1.07712	1.10434
							0.989161	1.00715	1.04938	1.02732	1.02541	1.05606		0.9811	1.03021	1.05326	1.06056	1.05655	1.07161
							0.952949	0.958854	1.01913	0.945182	0.938316	0.969822		0.981606	1.02948	1.04811	1.0473	1.05747	1.05851
							0.982081	1.00343	0.936875	1.04299	1.07066	1.07883		0.986827	0.994971	0.994136	1.03663	1.06339	1.065
							0.996164	1.03326	1.00888	1.06624	1.1049	1.11317		0.965426	1.00623	1.02446	1.03434	1.03346	1.06527
							0.991059	1.04676	1.04704	1.11813	1.13246	1.16885		1.01494	1.04384	1.05537	1.09122	1.0823	1.1553
							0.982393	0.995974	0.972433	1.04644	1.06385	1.10413		0.971333	0.970315	0.990925	0.984518	1.0078	1.03285
							0.975466	1.01402	0.9934	1.02212	1.03662	1.03874		0.964725	1.06295	1.04774	1.05878	1.01717	1.0719
							0.994675	1.0064	1.0152	1.04691	1.03564	1.0612		1.01567	1.04384	1.03353	1.05234	1.02681	1.04142
							0.981807	0.998964	1.04048	1.04238	1.02474	1.05749		0.993231	1.05772	1.0463	1.05066	1.06595	1.05362
							0.96223	1.00333	1.00105	1.03464	1.09162	1.12777		0.988935	1.0551	1.06691	1.05043	1.09329	1.09468
							1.00125	1.0069	1.00169	1.07286	1.07062	1.09347		0.971598	1.06845	1.05934	1.13012	1.05757	1.13002
							0.972337	1.00781	1.01627	1.03934	1.06801	1.0616		0.979448	1.06023	1.06146	1.11118	1.0672	1.11801
							0.958104	1.01516	0.986176	1.04969	1.11184	1.18123		0.989637	1.04704	1.0647	1.07777	1.09769	1.13795
							0.992448	1.00337	1.01636	1.0253	1.04031	1.04467		0.936261	1.02077	0.990167	1.04174	1.03044	1.0436
							0.999764	0.997907	1.01434	1.04732	1.02479	1.06962		0.981779	1.0548	1.05214	1.10043	1.06834	1.12469
							0.967141	0.957564	0.986361	0.948522	0.961304	0.976808		0.986517	1.04555	1.05228	1.06622	1.06658	1.07733
							0.975529	1.00921	1.003	1.06425	1.04943	1.07579		0.96899	1.02011	1.0463	1.04844	1.08163	1.09207
							1.0193	1.03639	0.953033	1.05113	1.07888	1.07232		0.986086	1.02038	1.05362	1.05438	1.08166	1.10382
							0.98838	1.00181	0.976347	0.974454	0.972565	0.970106		0.957676	1.03296	1.04381	1.04387	1.06048	1.07471
							1.00382	1.04305	0.969584	1.11795	1.18625	1.18792		0.952974	1.02404	1.01107	1.03439	1.03175	1.06144
							1.01189	1.02219	1.06658	1.03727	1.03707	1.04181		0.972399	1.01388	1.05884	1.05305	1.05648	1.09716
							0.992294	1.01064	1.01326	0.991398	1.00677	1.01885		0.96747	1.00867	1.04188	1.04473	1.07367	1.0917
							0.967551	1.00828	0.981574	1.02295	1.06729	1.07322		0.986013	1.01589	1.04438	1.03297	1.05368	1.06973
							0.991556	0.991169	1.03512	1.01094	1.02339	1.04068		0.958958	0.979212	0.984725	0.995995	1.01964	1.02303
							0.987684	0.99666	1.00646	1.00898	1.03179	1.07624		0.967623	1.03026	1.05251	1.07853	1.06952	1.13759
							0.991553	1.00313	1.00557	1.00724	0.997319	1.01786		0.985474	1.03719	1.07582	1.06218	1.06066	1.08218
							1.00066	1.03356	1.01138	1.04302	1.08114	1.11827		1.0118	0.995221	1.00817	1.01382	1.04532	1.05023
							0.99564	1.01175	1.07337	1.05947	1.106	1.1556		0.991434	1.01356	1.05224	1.06023	1.05489	1.07483
							0.994359	1.00795	1.05135	1.05194	1.09057	1.10858		0.982274	0.986729	1.01317	1.0334	1.03209	1.04835
							0.981221	1.00053	1.00661	1.01006	1.02106	1.02969		0.992683	0.991702	0.980707	1.00655	1.02773	1.01355
							0.973647	1.08303	1.01397	1.03305	1.10067	1.14488		1.00956	0.999866	0.993226	0.991145	1.02382	1.01028
							1.00652	1.06114	1.00904	1.0676	1.09098	1.10756		1.01095	1.00163	0.994802	0.993367	1.02588	1.01436
							1.01316	1.05041	1.01613	1.10517	1.14025	1.15819		0.9988	0.998315	0.995107	1.00767	1.02817	1.01428
							0.981411	1.00042	1.08787	1.04056	1.05688	1.10887		1.02209	1.01763	0.985433	0.982794	1.0073	0.951202
							1.0006	1.0276	1.00814	1.08998	1.14956	1.13698		1.00989	1.02241	1.01011	1.01216	1.04162	1.00685
							0.968574	0.996762	1.04463	0.992213	1.01938	1.03922		1.03895	1.01002	1.00274	1.00835	1.01513	1.01413
							0.979268	1.07003	1.00354	1.10303	1.09684	1.15439		1.04921	1.04855	1.0706	1.03384	1.02934	0.997402
							0.981796	1.01615	1.1113	1.08436	1.10779	1.13789		1.03567	1.03174	1.04756	1.01854	1.04856	1.02143
							0.98209	1.04974	1.05013	1.10178	1.07619	1.11093		0.99207	0.969312	0.97276	0.940978	0.98049	0.956856
							0.990278	1.01069	1.05915	1.01642	1.02154	1.01439		1.03049	0.992071	0.994893	0.96803	0.968891	0.939438
							1.01144	1.04211	0.999863	1.04575	1.09791	1.10803		1.01645	1.01619	1.11172	1.0731	1.03844	1.04807
							0.968603	0.972507	1.05498	0.948956	0.985611	0.972191		0.936074	0.95349	0.860004	0.929232	0.943348	0.958285
							0.972001	1.01124	0.962518	1.00181	1.04071	1.0303		0.967876	0.955869	1.05427	1.02393	0.998226	0.979682
														0.983744	0.990986	1.08865	1.05114	1.02167	1.01844
														0.986846	0.998293	1.00151	1.01661	1.01193	1.00458
														0.970878	1.02072	0.896993	0.929456	0.947216	0.956204
														0.980882	1.00658	1.09404	1.06433	1.014	1.01655
							0.977552	0.980088	1.00238	0.985782	0.959045	0.978195		0.962042	1.01443	0.975237	0.943872	0.955946	0.941216
							0.98838	1.00181	0.976347	0.974454	0.972565	0.970106		0.935857	0.970094	0.981628	0.983786	0.953437	0.935129
							1.00382	1.04305	0.969584	1.11795	1.18625	1.18792		0.978858	1.01126	0.987665	0.962123	0.96022	0.968857
							1.01189	1.02219	1.06658	1.03727	1.03707	1.04181		1.01747	1.06609	1.09578	1.02303	1.01711	1.00325
							0.994227	1.01719	1.01567	1.01868	1.04461	1.03714		0.959382	0.959445	0.955626	0.932183	0.936928	0.92411
							0.992294	1.01064	1.01326	0.991398	1.00677	1.01885		0.991284	0.973954	1.0957	1.00918	0.970606	0.960154
							0.967551	1.00828	0.981574	1.02295	1.06729	1.07322		0.983108	0.966811	0.961985	0.945193	0.959245	0.923202
							0.996972	1.01513	1.01954	1.05931	1.06549	1.03793		0.936192	0.922817	0.909898	0.921764	0.924209	0.900311
							0.991556	0.991169	1.03512	1.01094	1.02339	1.04068		0.953484	0.941707	0.922858	0.907485	0.907466	0.897643
							0.987684	0.99666	1.00646	1.00898	1.03179	1.07624		0.92036	0.922347	0.896422	0.932506	0.903053	0.907762
							0.9839	1.00912	1.0005	1.00555	1.00047	1.01404		0.978867	1.00615	1.01166	0.982232	1.00283	0.95815
							0.991553	1.00313	1.00557	1.00724	0.997319	1.01786		0.98467	0.981598	1.03851	1.00602	0.98177	0.972036
							0.978881	0.9709	0.994458	0.978367	0.976365	0.992272		0.979393	1.00026	1.03909	0.983173	0.974777	0.957005
							0.98415	0.997599	0.977134	1.0222	1.02199	1.03615		0.937651	0.942526	0.929148	0.947407	0.912883	0.920063
							0.959798	0.965651	1.00075	0.981336	0.996818	0.99481		0.976174	0.976351	0.962453	0.965997	0.949296	0.951885
							0.979214	0.991191	0.970616	0.983805	0.995383	1.00891		0.986846	0.998293	1.00151	1.01661	1.01193	1.00458
							0.982155	0.981343	0.982246	0.97121	0.967598	0.97723		0.970878	1.02072	0.896993	0.929456	0.947216	0.956204
							0.984682	0.990124	0.968936	0.990859	1.00378	0.987289		1.00381	1.04253	1.09282	1.04361	1.03004	1.00629
							0.984977	1.00791	0.972469	0.991602	1.00162	1.01227		1.0032	1.05747	1.08176	1.0427	1.01455	1.00638
							0.989268	0.990065	0.994858	1.00553	0.994058	1.0015		1.00156	1.04666	1.13966	1.07507	1.02217	1.01552
							0.983861	1.02317	0.99316	1.01543	1.02715	1.04333		1.01071	1.06749	1.1435	1.07744	1.02767	1.00814
							0.969624	0.980857	1.00407	0.994732	1.01	0.995822		0.940226	0.963352	0.852553	0.886188	0.901354	0.930157
							0.99873	0.994434	0.981465	0.986824	0.996646	1.00629		0.951364	0.935676	0.966264	0.956018	0.946482	0.936117
							0.997402	1.00392	1.00461	1.02482	1.04191	1.03258		0.945714	0.954629	1.0504	0.998186	0.973658	0.962582
							1.00066	1.03356	1.01138	1.04302	1.08114	1.11827		1.05047	1.29829	1.45233	1.30764	1.17882	1.16775
							0.99564	1.01175	1.07337	1.05947	1.106	1.1556		0.999542	1.22839	1.30731	1.18013	1.09987	1.09297
							0.994359	1.00795	1.05135	1.05194	1.09057	1.10858		0.979201	0.988491	1.06086	1.01941	0.956614	0.964226
							0.985603	0.987777	1.02645	0.996859	0.996304	1.00103		0.953976	0.949227	1.14583	1.03166	0.968548	0.936887
							1.00012	1.00092	0.990242	1.00141	1.00617	1.02125		0.979815	1.01416	0.866406	0.883366	0.909846	0.897012
							0.984065	1.01354	0.993279	1.01202	1.01139	1.02756		0.980882	1.00658	1.09404	1.06433	1.014	1.01655
							0.9829	1.00615	1.0015	1.01538	1.02961	1.0245		0.970328	0.978971	1.02523	0.97567	0.954774	0.937859
							0.987615	1.00571	1.01431	1.00741	1.04187	1.03689		0.940419	0.923322	0.937549	0.910877	0.919117	0.917319
							0.994314	0.985033	1.00845	1.01014	0.998614	1.0153		0.905343	0.925651	0.931947	0.897181	0.885661	0.884534
							0.98119	1.00182	0.995454	1.00065	1.01676	1.02245		0.94184	0.946543	1.09601	1.00197	0.942061	0.95565
							0.981221	1.00053	1.00661	1.01006	1.02106	1.02969		0.944881	0.964271	1.00458	0.979532	0.947347	0.955376
							0.973647	1.08303	1.01397	1.03305	1.10067	1.14488		0.940194	0.928407	1.01547	0.990504	0.96387	0.967478
							0.990201	0.986985	1.0261	0.999261	0.992603	1.01057		1.02825	1.07527	1.05914	1.01773	1.01058	0.980115
							1.0048	1.01557	0.991936	1.02001	1.03537	1.03641		0.964894	1.02006	1.02498	0.972445	0.96808	0.961674
							1.00652	1.06114	1.00904	1.0676	1.09098	1.10756		0.932667	0.956917	1.01365	0.959454	0.92454	0.922287
							0.98049	0.998993	1.06997	0.999731	1.00995	1.02474		0.972782	0.972799	1.05913	0.992498	0.92779	0.940338
							1.00078	1.01218	0.995783	1.04546	1.02018	1.03254		0.980045	0.968084	0.989932	0.954874	0.933392	0.933671
							1.01316	1.05041	1.01613	1.10517	1.14025	1.15819		0.955387	0.999173	1.0634	1.02997	0.974333	0.973604
							0.981411	1.00042	1.08787	1.04056	1.05688	1.10887		0.991067	1.03478	1.11131	1.03189	1.00381	0.984798
							1.0006	1.0276	1.00814	1.08998	1.14956	1.13698		0.985301	1.0336	1.10427	1.03126	1.0128	0.995623
							0.968574	0.996762	1.04463	0.992213	1.01938	1.03922		0.970673	1.01874	1.08813	1.02054	1.00524	0.973943
							0.979268	1.07003	1.00354	1.10303	1.09684	1.15439		0.956927	0.953968	1.0127	0.943228	0.940042	0.939061
							0.981796	1.01615	1.1113	1.08436	1.10779	1.13789		0.954128	0.935802	0.992655	0.960569	0.932625	0.924167
							0.98209	1.04974	1.05013	1.10178	1.07619	1.11093		0.938566	0.885506	0.802388	0.849719	0.896362	0.914687
							0.990278	1.01069	1.05915	1.01642	1.02154	1.01439		0.962599	0.951414	0.847235	0.901263	0.973825	0.962112
							1.01144	1.04211	0.999863	1.04575	1.09791	1.10803		0.963018	0.988519	1.07451	1.00651	0.98498	0.948771
							0.968603	0.972507	1.05498	0.948956	0.985611	0.972191		0.960793	0.958506	0.97201	0.9511	0.935635	0.925761
							0.972001	1.01124	0.962518	1.00181	1.04071	1.0303		0.978088	0.959307	0.979608	0.982818	0.962711	0.939105
							0.988181	1.00208	1.00595	1.02279	1.02769	1.03612		0.987985	0.979722	1.0042	1.00377	0.955265	0.957376
							0.991035	0.993681	1.00808	1.00584	1.01734	1.01862		0.982042	0.995624	0.974655	0.945067	0.960267	0.943739
							0.983071	1.01049	1.00981	1.01276	0.994766	1.00292		0.985403	1.00421	1.02901	1.00855	1.00201	0.967281
							0.995811	0.983482	0.987998	0.997318	0.98454	0.979628		0.964149	0.946744	0.963063	0.951081	0.927734	0.921447
														0.968852	0.982442	0.993803	0.952158	0.962897	0.969359
														1.00817	0.950009	0.914624	0.922085	0.925874	0.922156
														0.978367	0.996046	1.01134	0.975748	0.966959	0.946146
														0.94342	0.96138	0.98378	0.971978	0.94406	0.919693
														0.979693	0.971279	0.978586	0.965168	0.970208	0.925555
														0.944531	0.96064	0.997126	0.97295	0.94124	0.914754
														0.961188	0.953693	0.93408	0.917462	0.920398	0.907157
														0.992592	1.0228	1.11084	1.04662	1.00845	1.00505
														0.941344	0.983769	1.02466	0.972104	0.946607	0.944353
														0.936722	0.964495	1.06248	0.998206	0.944255	0.92954
														0.954909	0.940774	0.937112	0.918205	0.929555	0.906052
														1.01354	0.989851	1.04792	0.980015	0.992595	0.967427
														1.00185	0.955322	0.906138	0.898493	0.916348	0.913261
														0.972148	0.943372	0.920438	0.895958	0.899581	0.898808
														0.927631	0.935191	0.927549	0.902162	0.904636	0.889198
														1.02096	0.963148	0.849733	0.841473	0.901636	0.930756
														0.995698	0.999818	0.975203	0.96958	0.968209	0.962359
														0.941708	0.979171	1.00457	0.967998	0.96704	0.917358
														0.93673	1.01358	0.994505	0.977706	0.960108	0.952059
														0.978192	1.00836	1.07882	1.01895	0.98257	0.973706
														1.01188	1.05455	1.01897	1.01013	1.01033	0.988479

## Sheet: Fig 4-S1C
FCCP delta F/F0 threshold	Higd1c+/+	Higd1c-/-
-0.5	1	1
-0.45	1	1
-0.4	1	1
-0.35	1	1
-0.3	1	1
-0.25	0.998355	1
-0.2	0.996711	1
-0.15	0.986842	1
-0.1	0.952303	0.976143
-0.05	0.876645	0.795229
0	0.677632	0.481113
0.05	0.572368	0.38171
0.1	0.537829	0.341948
0.15	0.523026	0.33002
0.2	0.498355	0.316103
0.25	0.475329	0.304175
0.3	0.462171	0.292247
0.35	0.453947	0.286282
0.4	0.453947	0.284294
0.45	0.445724	0.282306
0.5	0.439145	0.276342
0.55	0.434211	0.272366
0.6	0.424342	0.266402
0.65	0.417763	0.262425
0.7	0.409539	0.256461
0.75	0.402961	0.250497
0.8	0.393092	0.246521
0.85	0.383224	0.234592
0.9	0.370066	0.224652
0.95	0.365132	0.222664
1	0.361842	0.2167
1.05	0.34375	0.210736
1.1	0.330592	0.206759
1.15	0.317434	0.200795
1.2	0.305921	0.196819
1.25	0.292763	0.190855
1.3	0.282895	0.178926
1.35	0.273026	0.17495
1.4	0.25	0.168986
1.45	0.238487	0.166998
1.5	0.225329	0.159046
1.55	0.215461	0.15507
1.6	0.199013	0.147117
1.65	0.182566	0.141153
1.7	0.166118	0.141153
1.75	0.15625	0.133201
1.8	0.146382	0.125249
1.85	0.139803	0.121272
1.9	0.128289	0.115308
1.95	0.118421	0.0994036
2	0.111842	0.0954274
2.05	0.106908	0.0914513
2.1	0.0953947	0.0914513
2.15	0.087171	0.0894632
2.2	0.0822368	0.0874752
2.25	0.0756579	0.0854871
2.3	0.0740132	0.0775348
2.35	0.069079	0.0735587
2.4	0.0657895	0.0715706
2.45	0.0625	0.0675944
2.5	0.055921	0.0636183
2.55	0.0509868	0.055666
2.6	0.0493421	0.0536779
2.65	0.0476974	0.0516899
2.7	0.0411184	0.0516899
2.75	0.0328947	0.0516899
2.8	0.0296053	0.0477137
2.85	0.0296053	0.0437376
2.9	0.0279605	0.0437376
2.95	0.0230263	0.0417495
3	0.0197368	0.0417495
3.05	0.0115132	0.0417495
3.1	0.00986842	0.0377734
3.15	0.00986842	0.0357853
3.2	0.00657895	0.0357853
3.25	0.00657895	0.0357853
3.3	0.00657895	0.0357853
3.35	0.00657895	0.0357853
3.4	0.00657895	0.0357853
3.45	0.00493421	0.0337972
3.5	0.00493421	0.0318092
3.55	0.00493421	0.027833
3.6	0.00493421	0.027833
3.65	0.00493421	0.027833
3.7	0.00328947	0.027833
3.75	0.00328947	0.0258449
3.8	0.00328947	0.0238569
3.85	0.00328947	0.0238569
3.9	0.00328947	0.0218688
3.95	0.00328947	0.0198807
4	0.00164474	0.0178926
4.05	0.00164474	0.0178926
4.1	0.00164474	0.0178926
4.15	0.00164474	0.0178926
4.2	0.00164474	0.0178926
4.25	0.00164474	0.0178926
4.3	0.00164474	0.0178926
4.35	0.00164474	0.0178926
4.4	0.00164474	0.0178926
4.45	0.00164474	0.0159046
4.5	0.00164474	0.0159046
4.55	0.00164474	0.0159046
4.6	0.00164474	0.0139165
4.65	0.00164474	0.0139165
4.7	0.00164474	0.0119284
4.75	0.00164474	0.0119284
4.8	0	0.0119284
4.85	0	0.00994036
4.9	0	0.00994036
4.95	0	0.00994036
