# Supplementary material for: Tissue-specific mitochondrial HIGD1C promotes oxygen sensitivity in carotid body chemoreceptors
Source: eLife journal article supplement (doi:10.7554/elife.78915), 2022-10-18
Supplement: supp [file Fig 5-fig supplement 1-source data 2.xlsx]

## Sheet: Fig 5-S1F
CIV Activity
WT	WT
	+COX4I1	+COX4I2	+HIGD1C	+HIGD1C +COX4I1	+HIGD1C +COX4I2	+Higd1c	+Higd1c +COX4I1	+Higd1c +COX4I2
0.927472	1.61508	2.02023	0.529683	1.58493	1.59775	0.525804	1.03597	1.00034
0.929565	1.41645	2.09868	0.774244	1.13028	1.6003	0.7564	1.02348	1.29576
1.14296	1.64296	1.47199	0.593289	1.2938	1.01809	0.99787	1.02817	1.42083

## Sheet: Fig 5-S1G
Citrate Synthase Activity
WT	WT
	+COX4I1	+COX4I2	+HIGD1C	+HIGD1C +COX4I1	+HIGD1C +COX4I2	+Higd1c	+Higd1c +COX4I1	+Higd1c +COX4I2
1.11301	0.893533	0.883478	0.946522	1.04757	1.19989	1.07442	1.08417	0.933068
1.10468	0.982527	1.10659	1.08003	0.992537	1.16452	0.884836	0.827355	1.18026
0.813331	1.00619	1.07887	1.1155	0.960344	0.704014	1.27337	1.0295	1.12107

## Sheet: Fig 5-S1H
Respiration (mol oxygen min-1 cell-1)
	WT			WT+HIGD1C			WT+Higd1c
Basal respiration	1.66e-05	1.73e-05	1.71e-05	1.23e-05	1.55e-05	1.01e-05	1.37e-05	1.27e-05	1.57e-05
Phosphorylating	1.98e-05	1.91e-05	1.84e-05	1.5e-05	1.89e-05	1.35e-05	1.54e-05	1.38e-05	1.83e-05
Resting	1.35e-05	1.44e-05	1.38e-05	9.53e-06	1.21e-05	9.66e-06	8.1e-06	8.13e-06	1.14e-05
Uncoupled	2.73e-05	2.78e-05	2.97e-05	1.93e-05	2.2e-05	1.9e-05	1.9e-05	1.6e-05	2.13e-05

## Sheet: Fig 5-S1I
Respiratory control ratio: uncoupled/resting
WT	WT+HIGD1C	WT+Higd1c
2.02	2.019	2.343
1.931	1.816	1.967
2.155	1.964	1.869
