# Supplementary material for: Tissue-specific mitochondrial HIGD1C promotes oxygen sensitivity in carotid body chemoreceptors
Source: eLife journal article supplement (doi:10.7554/elife.78915), 2022-10-18
Supplement: supp [file Fig 5-fig supplement 2-source data 2.xlsx]

## Sheet: Fig 5-S2F
Citrate Synthase Activity
WT	HIGD1A-KO
	+EV	+HIGD1A	+COX4I1	+COX4I2	+HIGD1C	+HIGD1C+COX4I1	+HIGD1C+COX4I2	+HIGD1C+COX4I2+siCOX4I1	+Higd1c
1.10892	0.997099	1.1234	1.07108	0.975361	1.03881	0.943323	1.08135	1.13806	0.883027
0.919988	0.990038	1.04896	1.09957	1.06009	1.16109	1.06257	1.02765	0.942479	1.07099
0.971093	1.27451	0.927766	1.02833	0.949187	1.09299	0.994067	1.18706	0.93232	1.15739
