# Supplementary material for: Tissue-specific mitochondrial HIGD1C promotes oxygen sensitivity in carotid body chemoreceptors
Source: eLife journal article supplement (doi:10.7554/elife.78915), 2022-10-18
Supplement: supp [file Fig 5-source data 2.xlsx]

## Sheet: Fig 5D
Complex IV Activity
WT	HIGD1A-KO
	+EV	+HIGD1A	+COX4I1	+COX4I2	+HIGD1C	+HIGD1C+COX4I1	+HIGD1C+COX4I2	+HIGD1C+COX4I2+siCOX4I1	+Higd1c
0.976692	0.716509	1.22339	1.4868	1.95955	1.20222	0.959501	0.735555	0.812552	0.639881
0.923957	0.58978	1.156	1.24893	2.04664	1.24096	0.852567	0.676418	0.823506	0.681993
1.09935	0.586235	0.844813	1.834	1.71762	1.14885	1.00478	0.720886	0.740868	0.620897

## Sheet: Fig 5E
Condition	Respiration (mol oxygen min-1 cell-1)
	WT			HIGD1A-KO +EV			HIGD1A-KO +HIGD1A			HIGD1A-KO +HIGD1C			HIGD1A-KO +Higd1c
Basal respiration	2.1e-05	2.54e-05	2.1e-05	1.34e-05	1.33e-05	1.34e-05	2.77e-05	2.34e-05	1.93e-05	2.05e-05	2.48e-05	2.92e-05	2.06e-05	2.04e-05	1.86e-05
Phosphorylating	2.27e-05	2.76e-05	2.24e-05	1.7e-05	1.47e-05	1.79e-05	2.76e-05	2.22e-05	1.99e-05	2.28e-05	2.62e-05	3.15e-05	2.7e-05	2.15e-05	2.03e-05
Resting	1.4e-05	1.26e-05	1.3e-05	8.03e-06	7.74e-06	9.22e-06	1.53e-05	1.31e-05	1.21e-05	1.51e-05	1.53e-05	1.53e-05	1.79e-05	1.57e-05	1.08e-05
Uncoupled	2.71e-05	2.7e-05	2.64e-05	1.85e-05	1.52e-05	2.13e-05	2.95e-05	2.83e-05	2.73e-05	2.62e-05	2.56e-05	3.38e-05	3.27e-05	3.33e-05	2.33e-05

## Sheet: Fig 5F
Respiratory control ratio: uncoupled/resting
WT			HIGD1A-KO +EV			HIGD1A-KO +HIGD1A			HIGD1A-KO +HIGD1C			HIGD1A-KO +Higd1c
1.927	2.148	2.036	2.308	1.968	2.307	1.922	2.163	2.248	1.739	1.672	2.213	1.833	2.12	2.159
