# Supplementary material for: Tissue-specific mitochondrial HIGD1C promotes oxygen sensitivity in carotid body chemoreceptors
Source: eLife journal article supplement (doi:10.7554/elife.78915), 2022-10-18
Supplement: supp [file Fig 5-supplement 3-source data 2.xlsx]

## Sheet: Fig5-S3E
CIV Activity
WT	HIGD2A-KO
	+EV	+HIGD2A	+HIGD1C	+Higd1c
0.815039	0.332723	1.02849	0.36566	0.247773
1.16566	0.322566	0.931488	0.366877	0.376352
1.0193	0.336924	1.08417	0.377658	0.293724

## Sheet: Fig5-S3F
Citrate Synthase Activity
WT	HIGD2A-KO
	+EV	+HIGD2A	+HIGD1C	+Higd1c
1.00049	1.03303	1.13483	1.1391	1.1198
0.999509	1.16663	1.13364	0.922101	0.943765
1.02844	1.02448	1.04465	0.924697	0.91251
