# Supplementary material for: Tissue-specific mitochondrial HIGD1C promotes oxygen sensitivity in carotid body chemoreceptors
Source: eLife journal article supplement (doi:10.7554/elife.78915), 2022-10-18
Supplement: supp [file Fig 6-fig supplement 1-source data 1.xlsx]

## Sheet: Fig 6-S1B
Relative peak height: a+a3
WT	HIGD1A-KO
	+EV	+HIGD1A	+HIGD1C	+HIGD1C+COX4I2	+Higd1c
1.13298	1.32611	0.566292	0.598414	0.572241	0.658295
0.973166	1.04296	0.625777	0.724917	0.597621	0.718969
0.893853	0.913681	0.774488	0.793126	0.667812	0.523067

## Sheet: Fig 6-S1C
Relative peak height: cyt b
WT	HIGD1A-KO
	+EV	+HIGD1A	+HIGD1C	+HIGD1C+COX4I2	+Higd1c
1.04096	1.51969	0.8431	0.839589	0.919836	1.2338
0.97952	1.36646	0.521859	0.721976	0.994817	1.05626
0.97952	0.812254	0.847864	1.03619	1.25437	0.98905
					C

## Sheet: Fig 6-S1D
Normoxia CIV Activity (mol oxygen min^-1 cell^-1)
WT	HIGD1A-KO
	+EV	+HIGD1A	+HIGD1C	+COX4I2	+HIGD1C +COX4I2
0.000222	0.000187	0.000259	0.000366	0.000322	0.000319
0.000253	0.00033	0.000325	0.000315	0.000331	0.000342
0.000332	0.000266	0.000267	0.000226	0.000318	0.000286
0.000245	0.00028341	0.00026311	0.00031243	0.000334	0.00027271
0.000258	0.00021323	0.00021318	0.00025668	0.000342	0.00031234
0.000421	0.00036499	0.00027268	0.00030666		0.00027526
0.00025
0.000205
Hypoxia CIV Activity (mol oxygen min^-1 cell^-1)
WT	HIGD1A-KO
	+EV	+HIGD1A	+HIGD1C	+COX4I2	+HIGD1C +COX4I2
0.000178	0.000106	0.000168	0.000224	0.000198	0.000137
0.000152	0.000247	0.000197	0.000176	0.000165	0.00012
0.000216	0.000189	0.000168	0.000153	0.000192	0.000121
0.000148	0.00015969	0.00015802	0.0001935	0.000194	0.0001249
0.000108	0.00011275	0.00013393	0.00015213	0.000209	0.00010937
0.000308	0.00016239	0.00016031	0.00015276		0.00011868
0.000133
0.000124
