# Supplementary material for: Tissue-specific mitochondrial HIGD1C promotes oxygen sensitivity in carotid body chemoreceptors
Source: eLife journal article supplement (doi:10.7554/elife.78915), 2022-10-18
Supplement: supp [file Fig 6-source data 1.xlsx]

## Sheet: Fig 6B
Relative peak height: (a+a3)/cyt b
WT	HIGD1A-KO
	+EV	+HIGD1A	+HIGD1C	+HIGD1C+COX4I2	+Higd1c
1.0884	0.872619	0.671679	0.712746	0.533549	0.622111
0.993513	0.763256	1.19913	1.00407	0.680676	0.600734
0.912542	1.12487	0.913457	0.765422	0.528858	0.53239

## Sheet: Fig 6C
Relative peak area: a+a3
WT	HIGD1A-KO
	+EV	+HIGD1A	+HIGD1C	+HIGD1C+COX4I2	+Higd1c
1.03767	1.20203	1.0138	0.72576	0.737975	0.86269
0.992691	1.26371	0.834154	0.888802	0.756678	0.736513
0.969642	1.05319	0.904081	0.880051	1.00679	0.619909

## Sheet: Fig 6D
Relative peak base width: a+a3
WT	HIGD1A-KO
	+EV	+HIGD1A	+HIGD1C	+HIGD1C+COX4I2	+Higd1c
1.01325	1.03311	0.928808	1.21192	1.21689	1.19702
0.97351	1.15232	1.14238	1.24172	1.19702	1.17715
1.01325	1.04305	1.15728	1.16225	1.26656	1.19702
\

## Sheet: Fig 6E
CIV Activity Ratio (Hypoxia:Normoxia)
WT	HIGD1A-KO
	+EV	+HIGD1A	+HIGD1C	+COX4I2	+HIGD1C +COX4I2
0.8	0.564972	0.649351	0.609756	0.613786	0.429185
0.598802	0.746269	0.606061	0.558659	0.499851	0.352113
0.649351	0.70922	0.628931	0.680272	0.603417	0.421941
0.60444	0.563443	0.600578	0.619328	0.580831	0.457991
0.418093	0.528761	0.628255	0.592683	0.610525	0.350145
0.732091	0.44492	0.587913	0.498147		0.431173
0.532683
0.606338

## Sheet: Fig 6F
p50 (mmHg)
WT	HIGD1A-KO
	+EV	+HIGD1A	+HIGD1C	+COX4I2	+HIGD1C +COX4I2
0.254111	0.268687	0.282122	0.307325	0.127866	0.310442
0.261441	0.312765	0.266689	0.205418	0.138129	0.447799
0.235745	0.298451	0.219324	0.219324	0.154334	0.382323
0.224941	0.328268	0.292833	0.26476	0.170539	0.42735
