# Supplementary figures and images for: Tissue-specific mitochondrial HIGD1C promotes oxygen sensitivity in carotid body chemoreceptors
Source: eLife journal article supplement (doi:10.7554/elife.78915), 2022-10-18

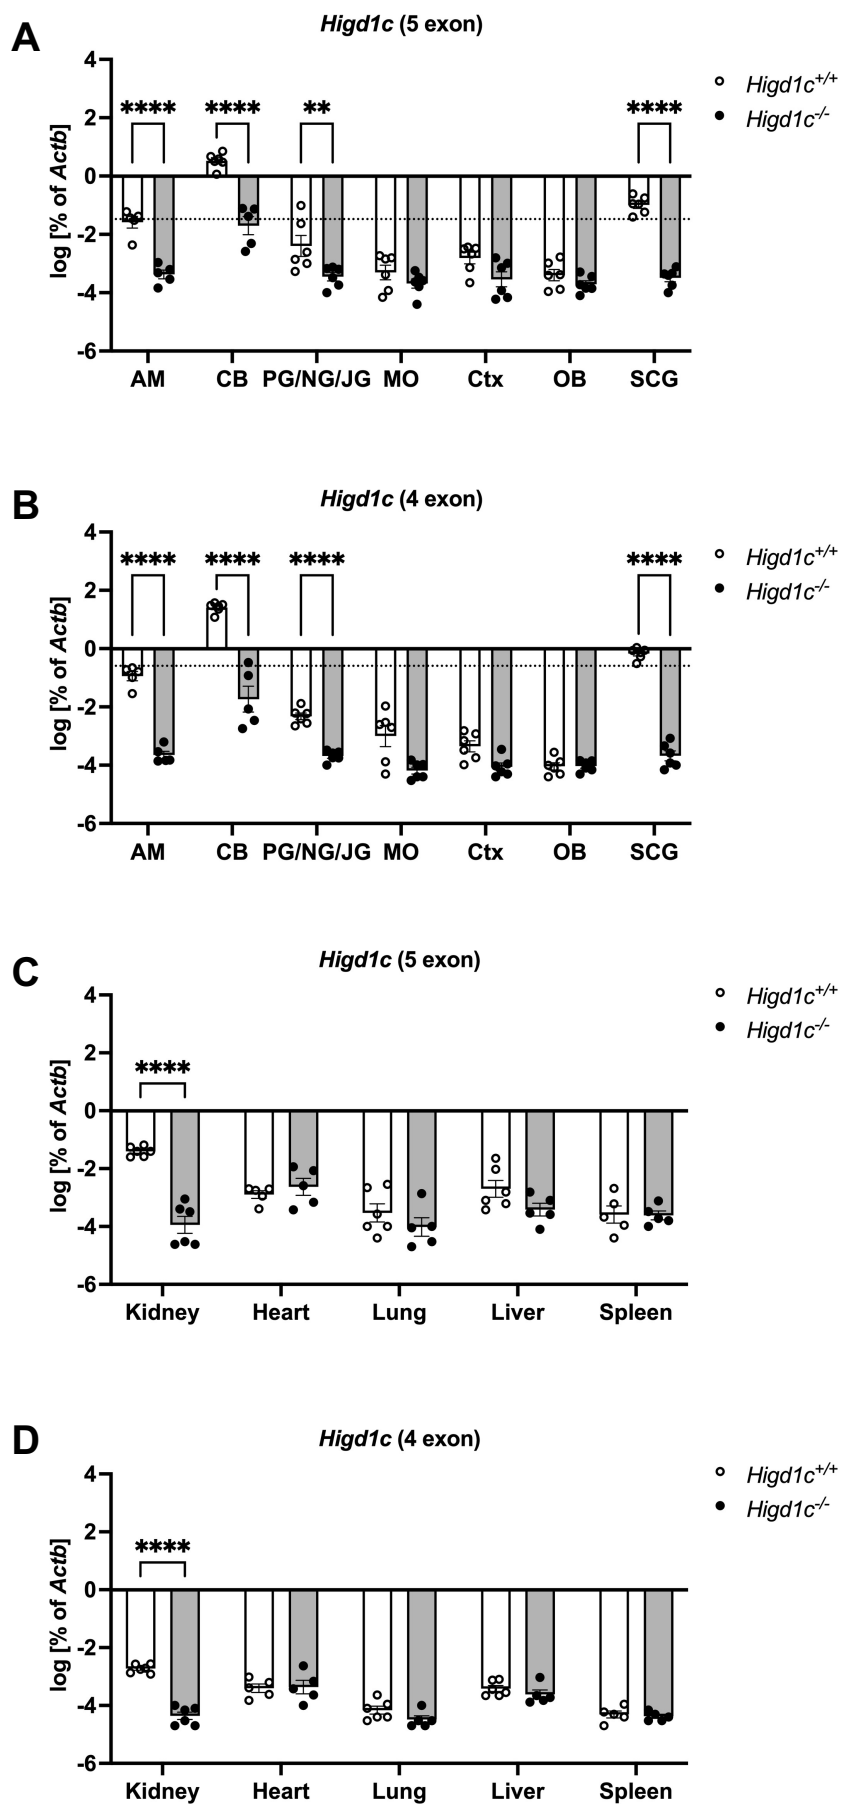

Supplement: supp [file elife-78915-supp-v1.zip]

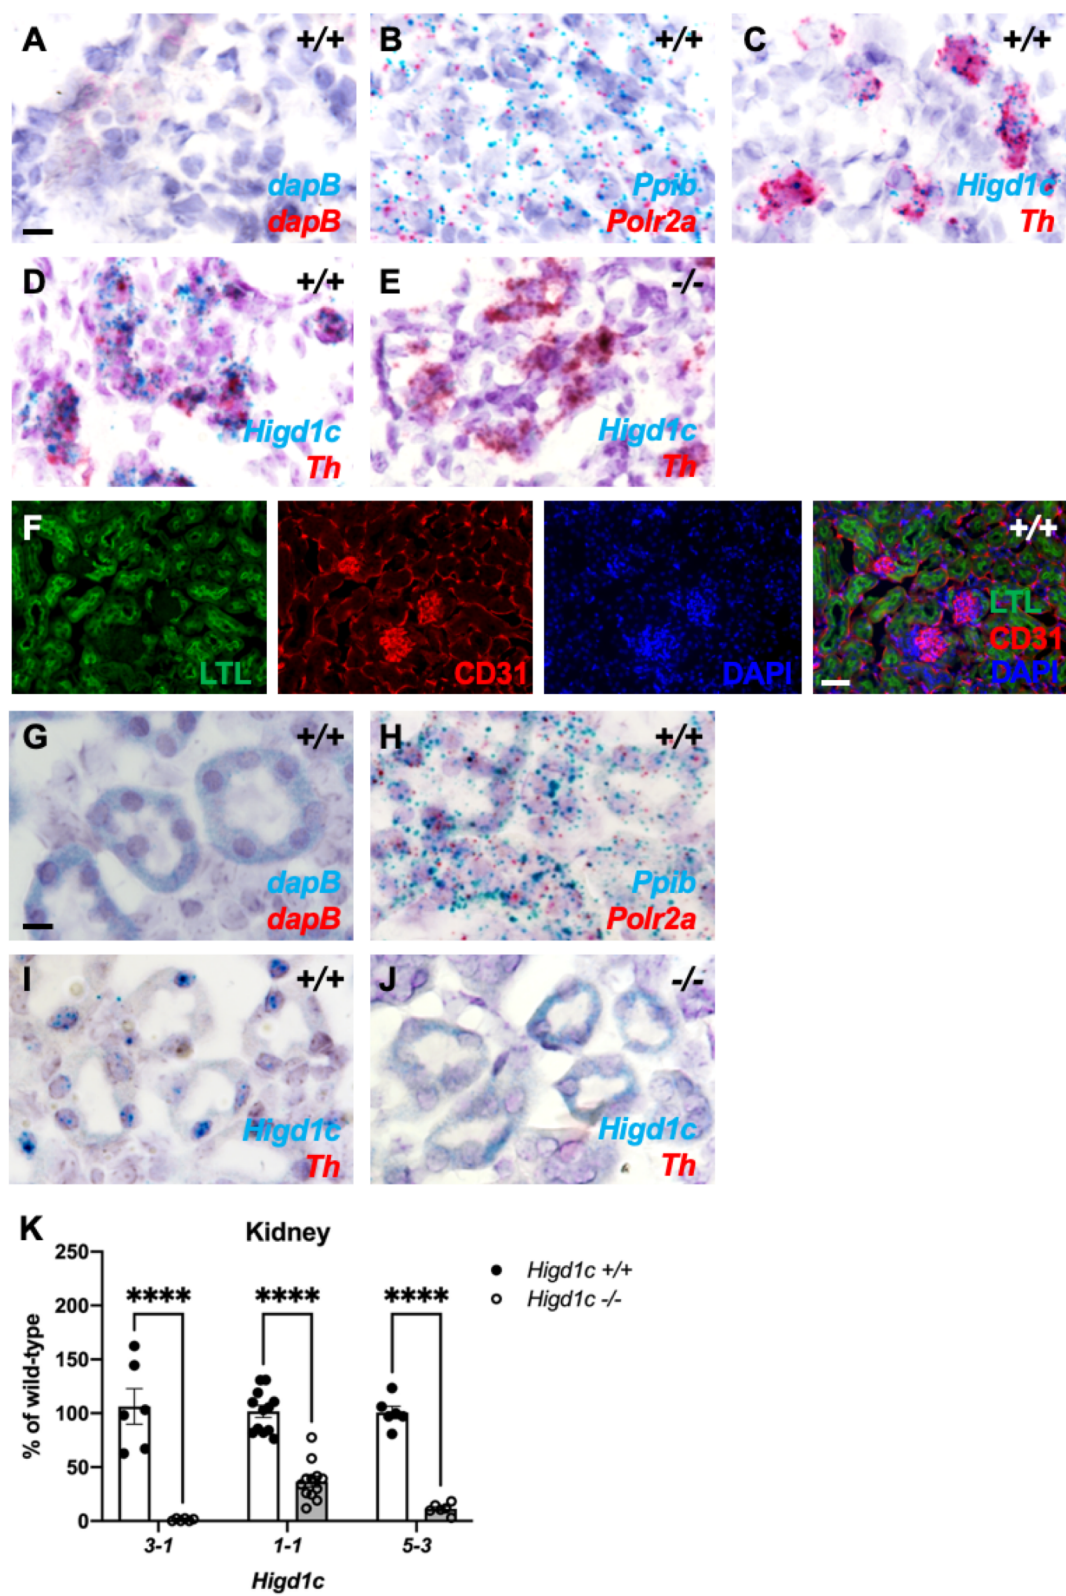

Supplement: supp [file elife-78915-supp-v1.zip]

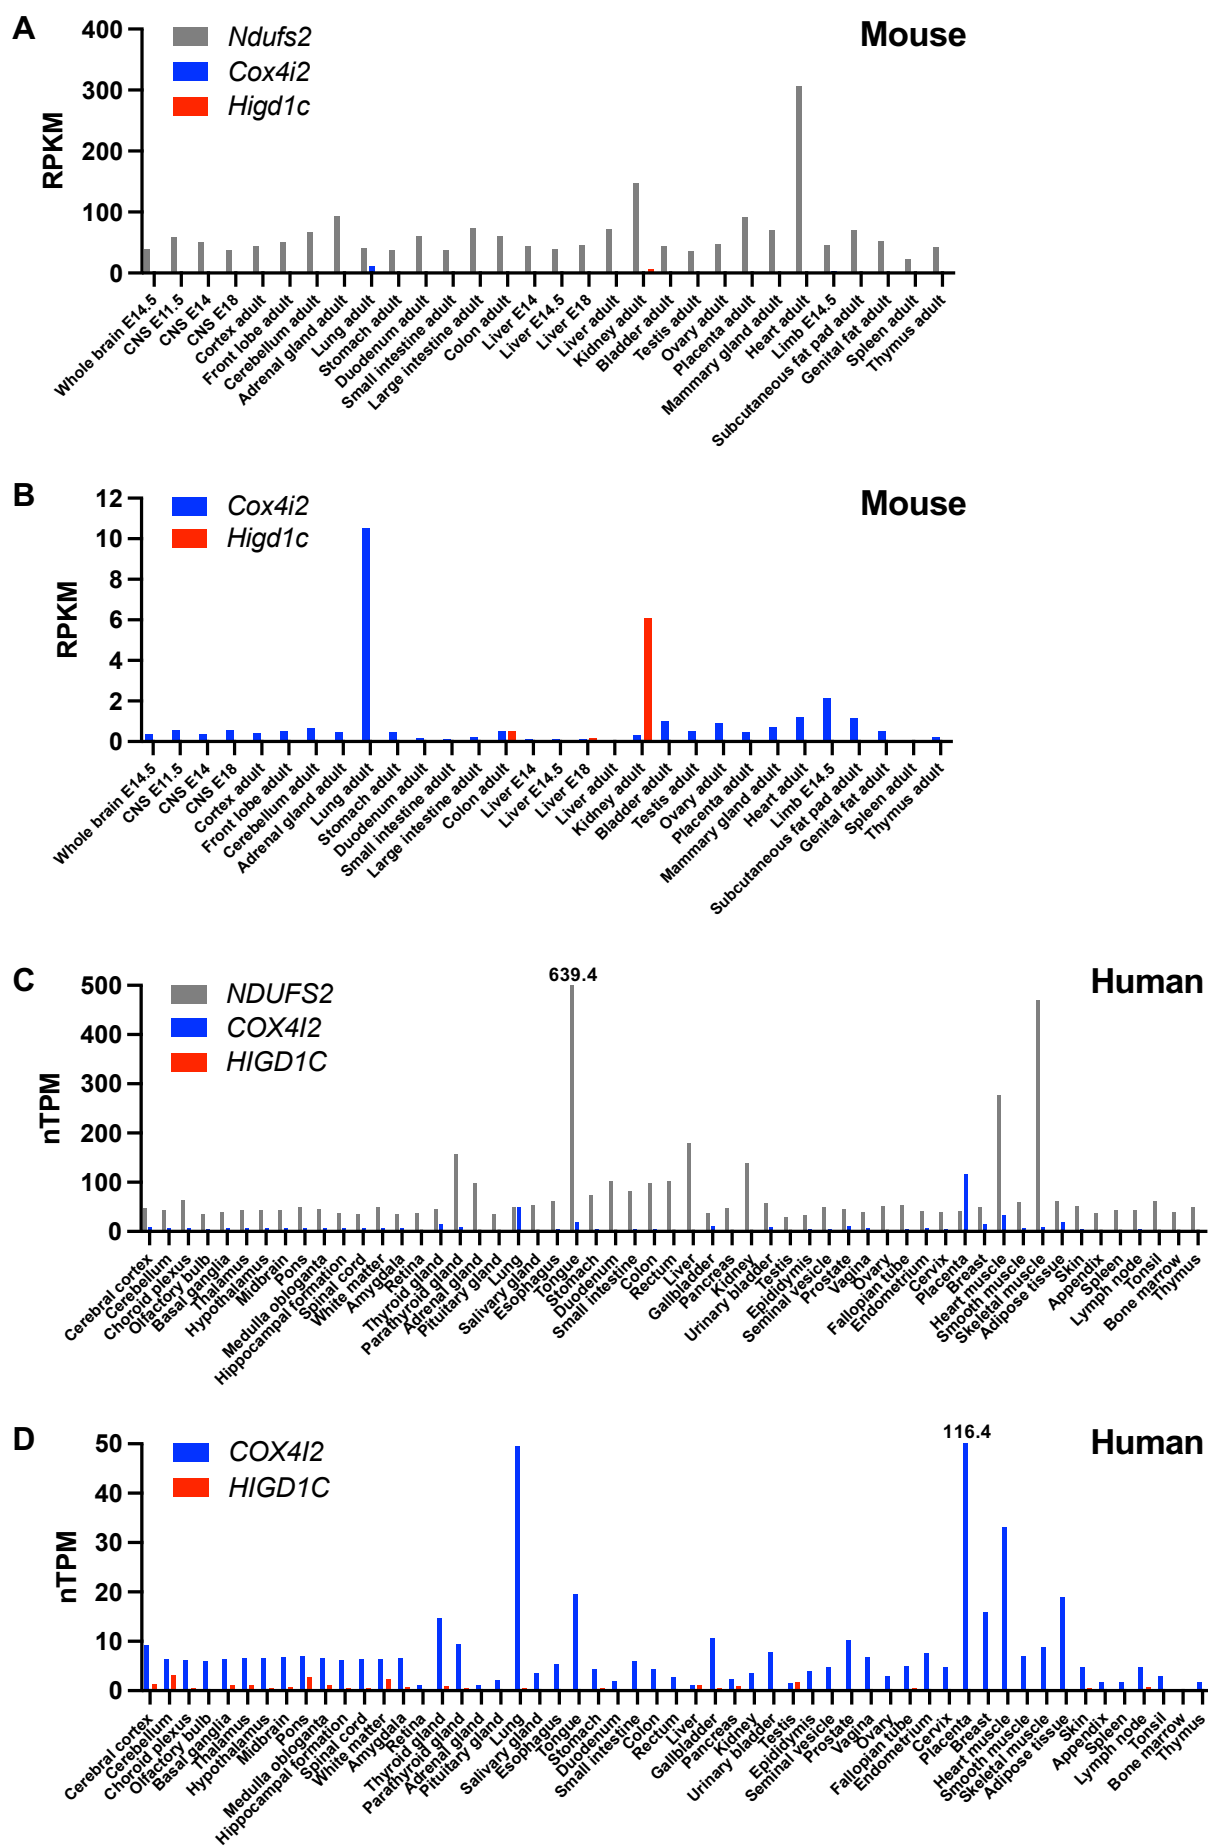

Supplement: supp [file elife-78915-supp-v1.zip]

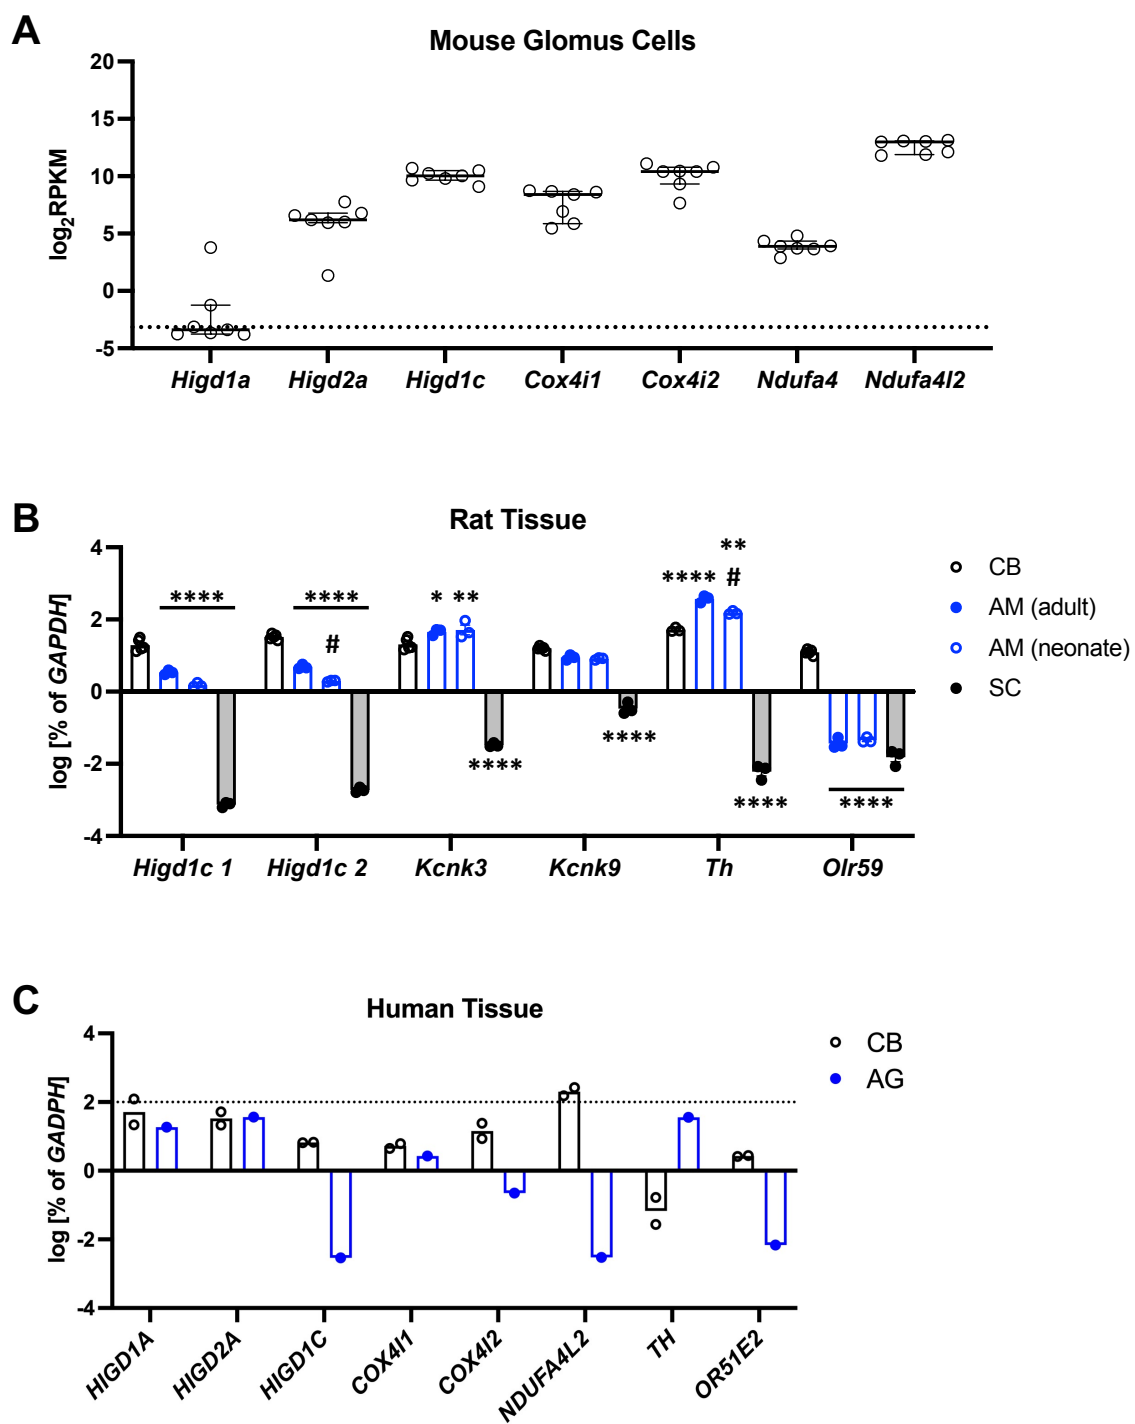

Supplement: supp [file elife-78915-supp-v1.zip]

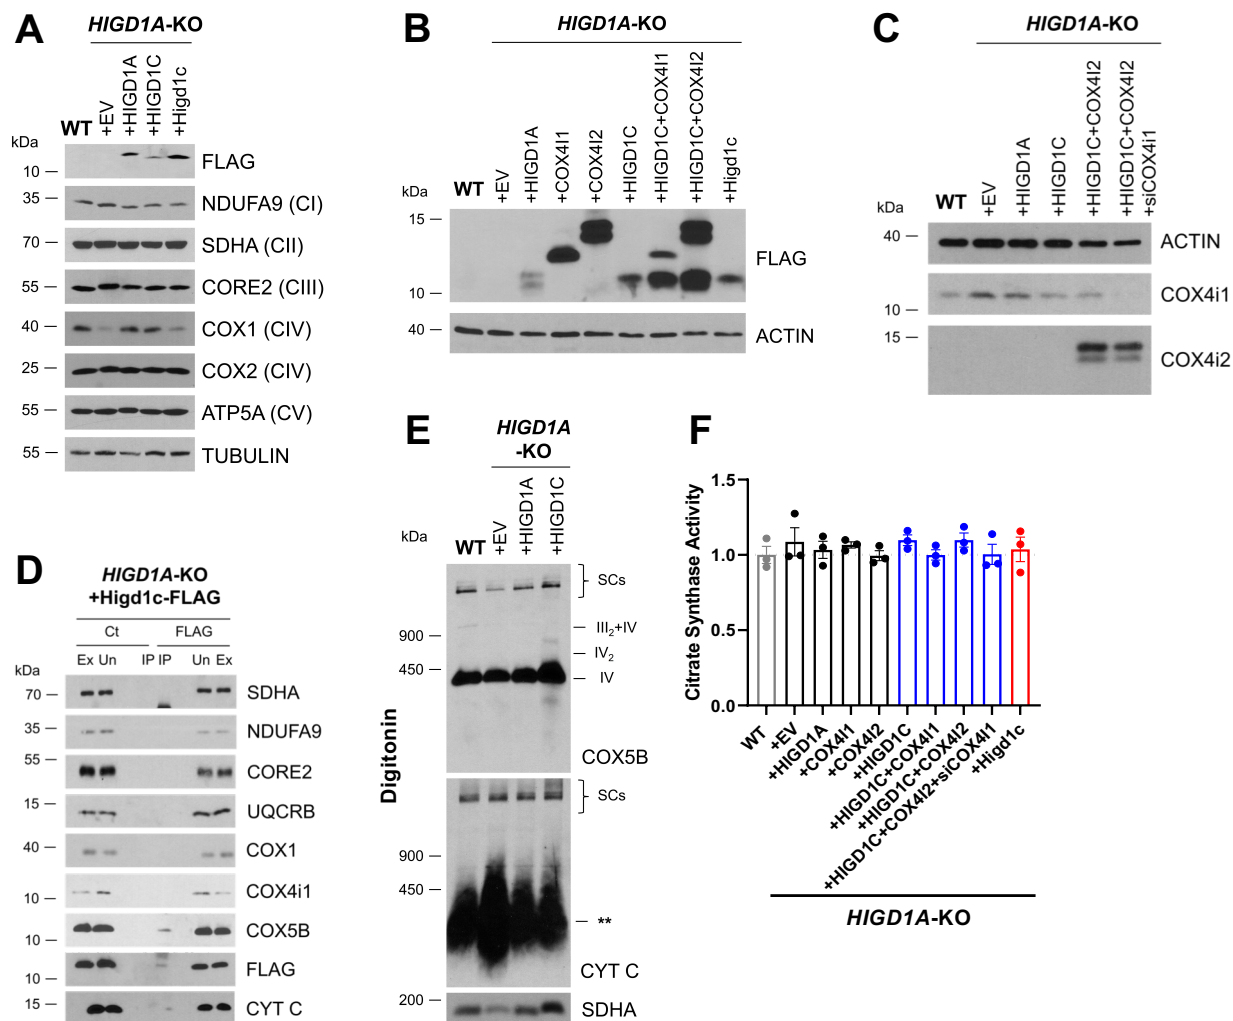

Supplement: supp [file elife-78915-supp-v1.zip]

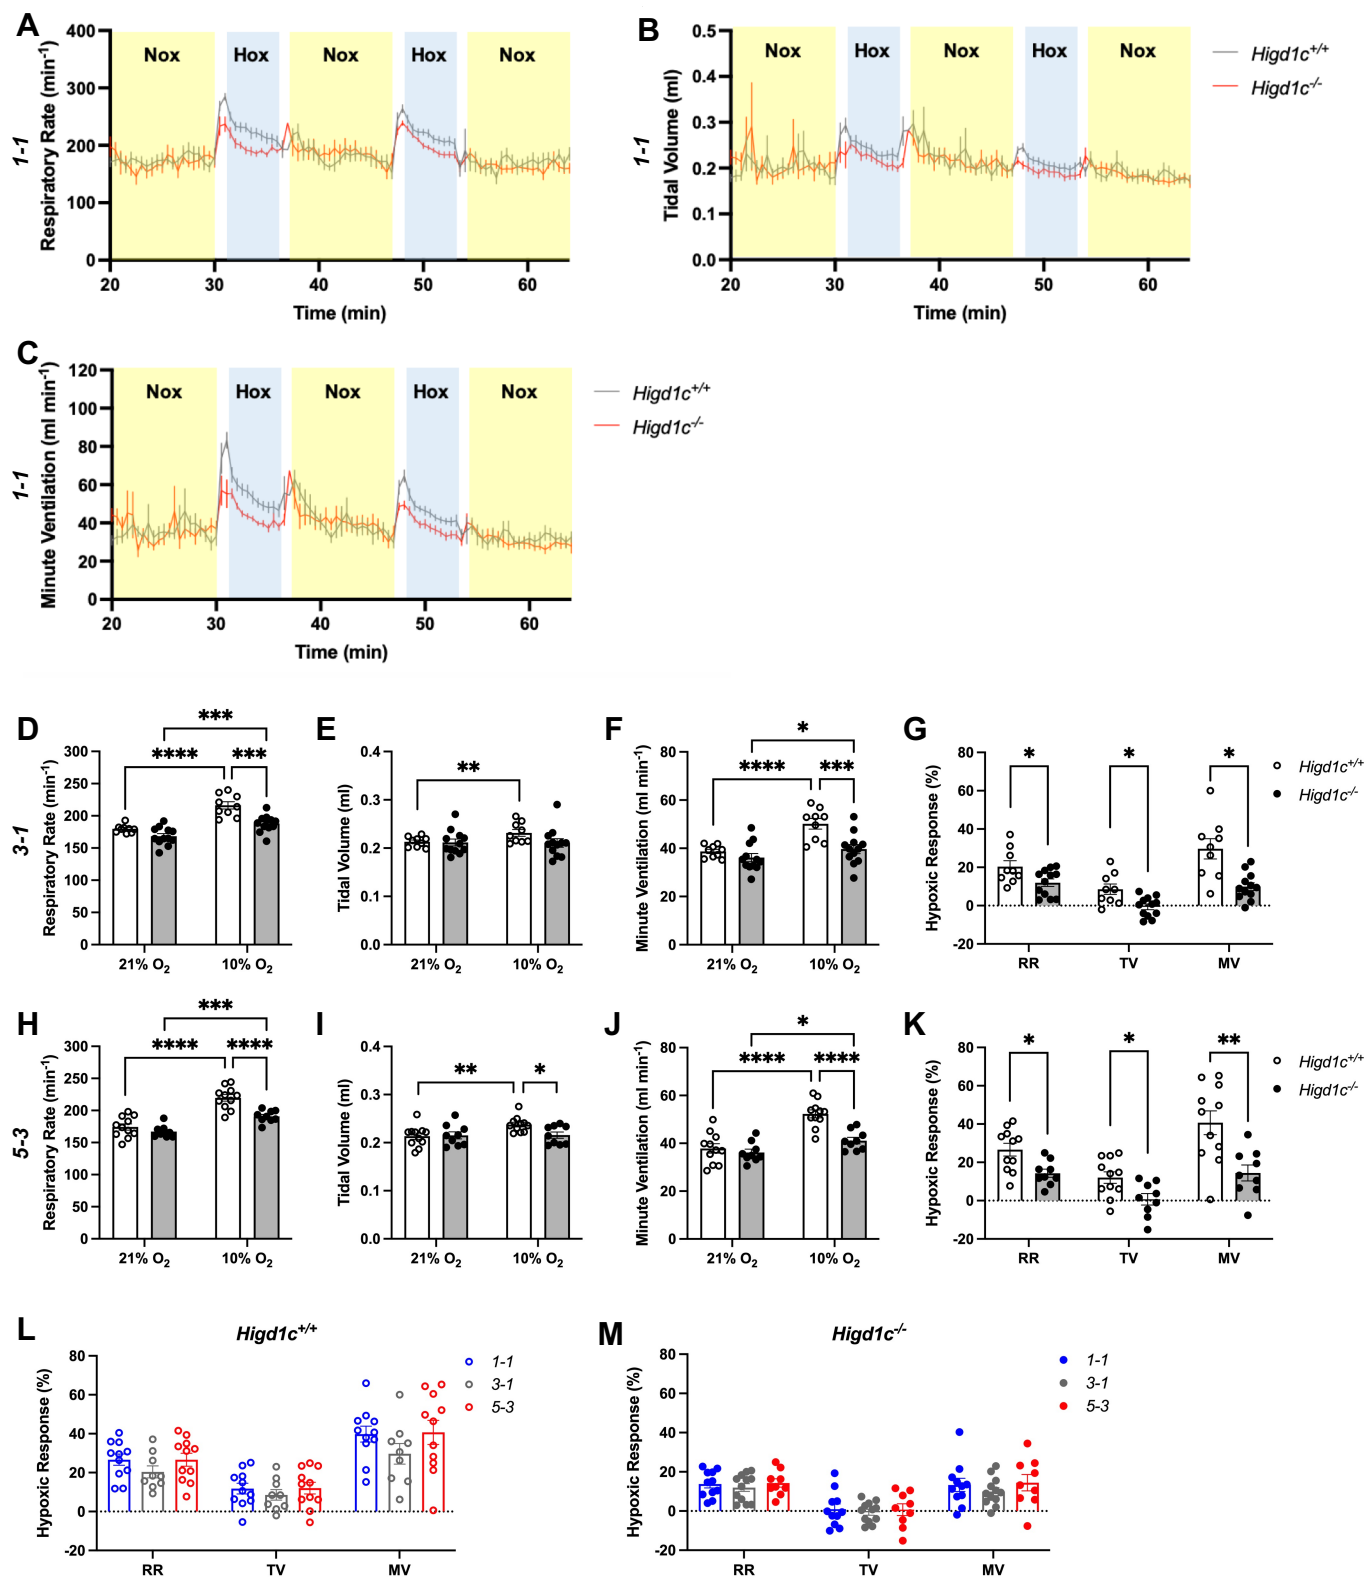

Supplement: supp [file elife-78915-supp-v1.zip]

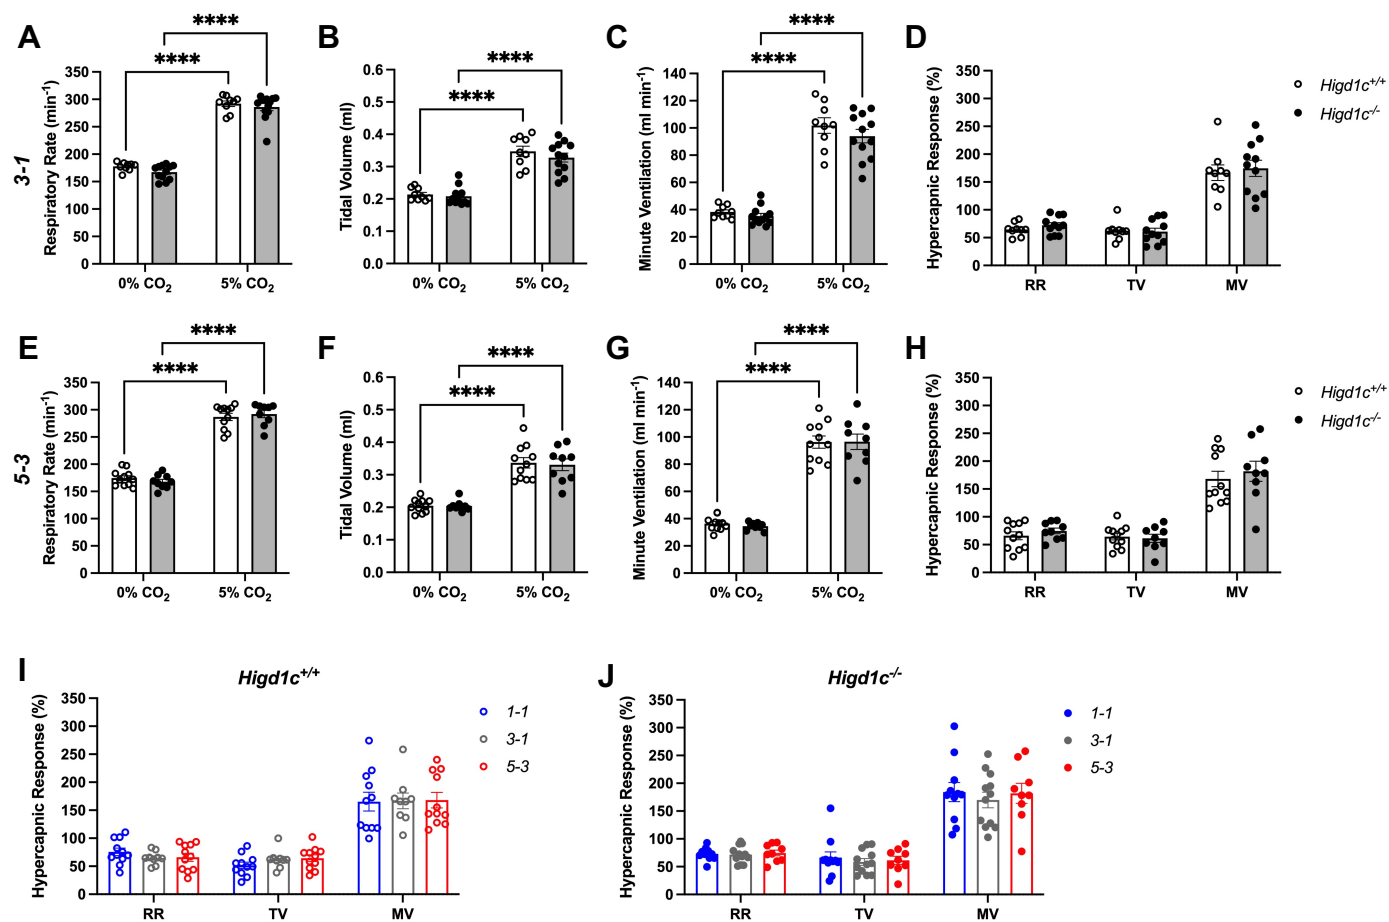

Supplement: supp [file elife-78915-supp-v1.zip]

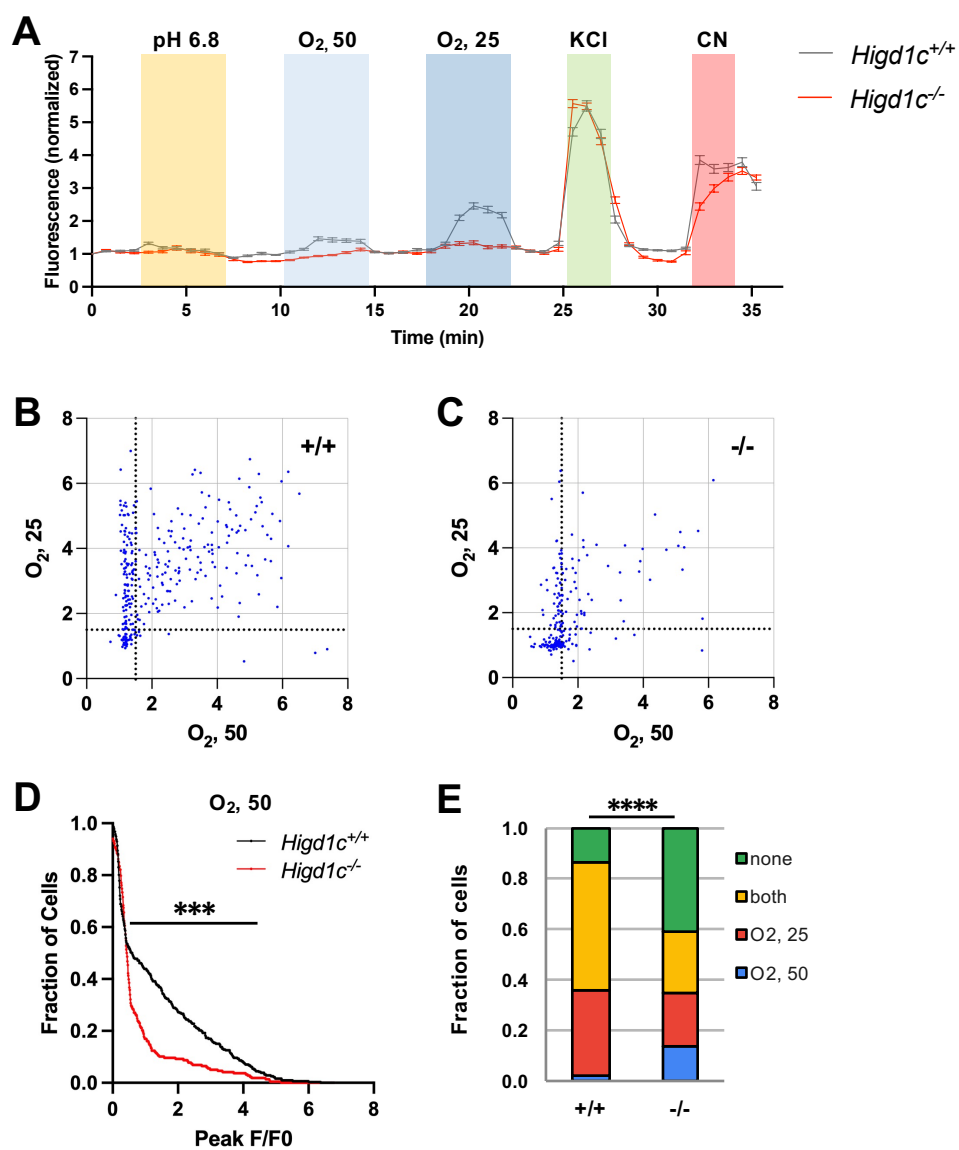

Supplement: supp [file elife-78915-supp-v1.zip]

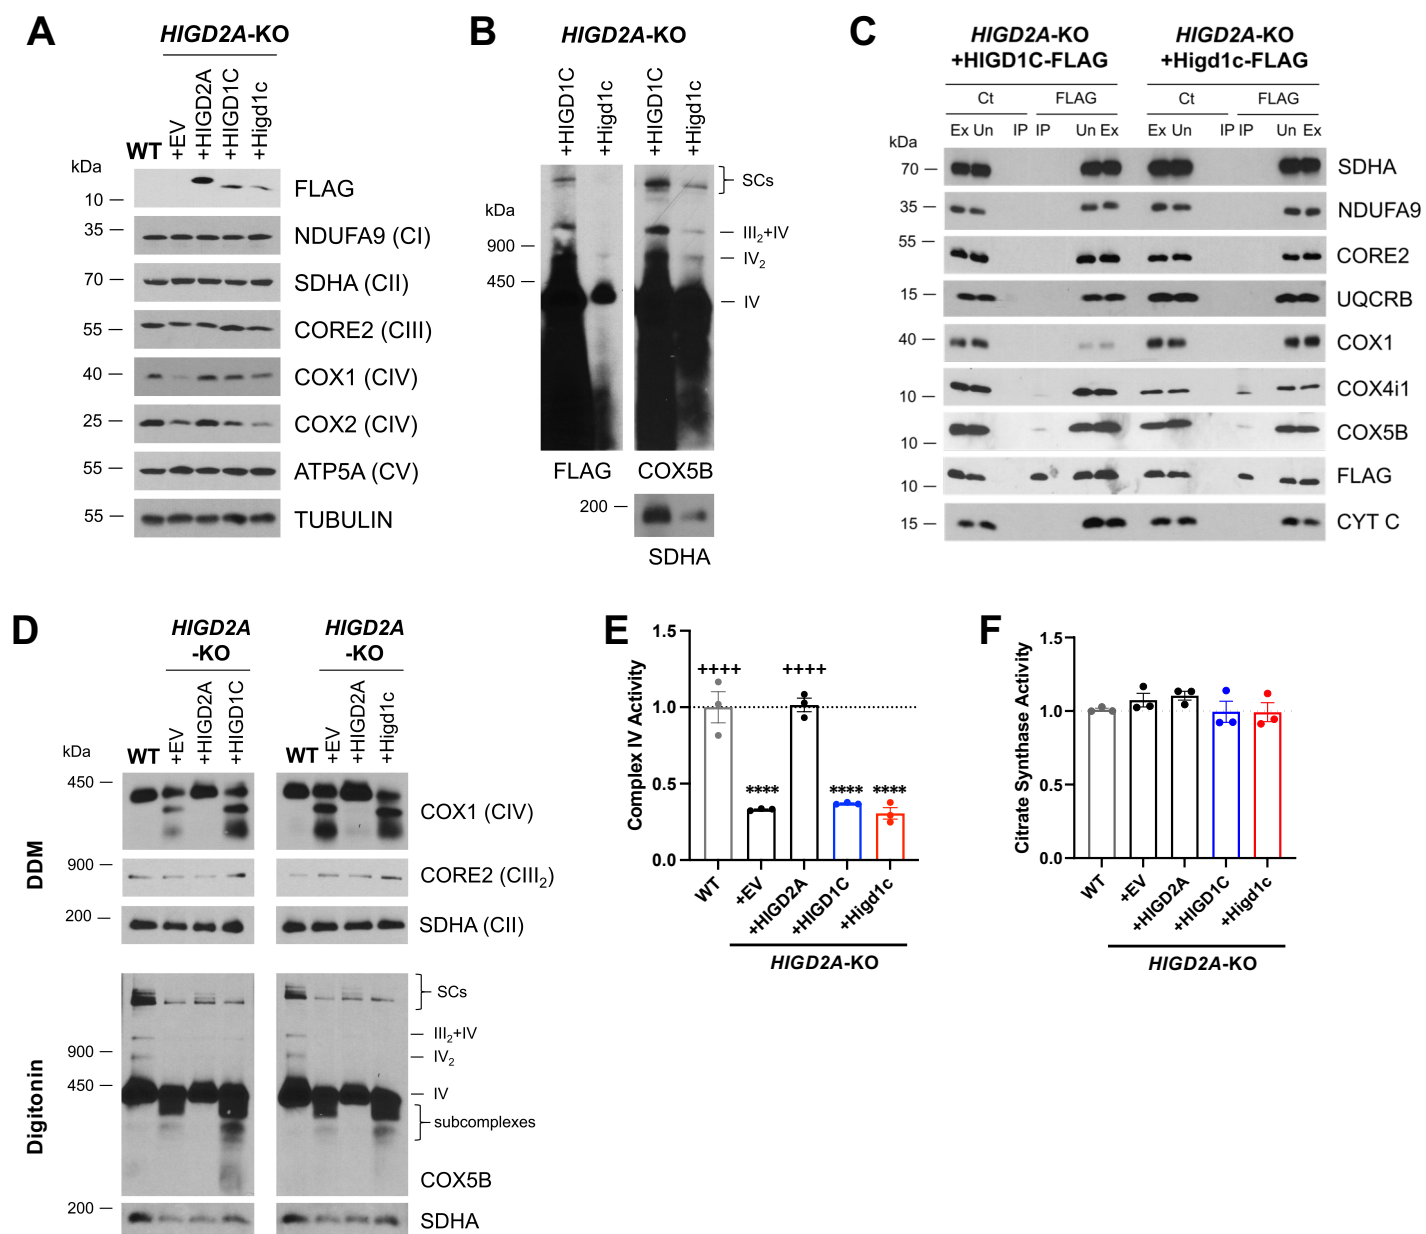

Supplement: supp [file elife-78915-supp-v1.zip]

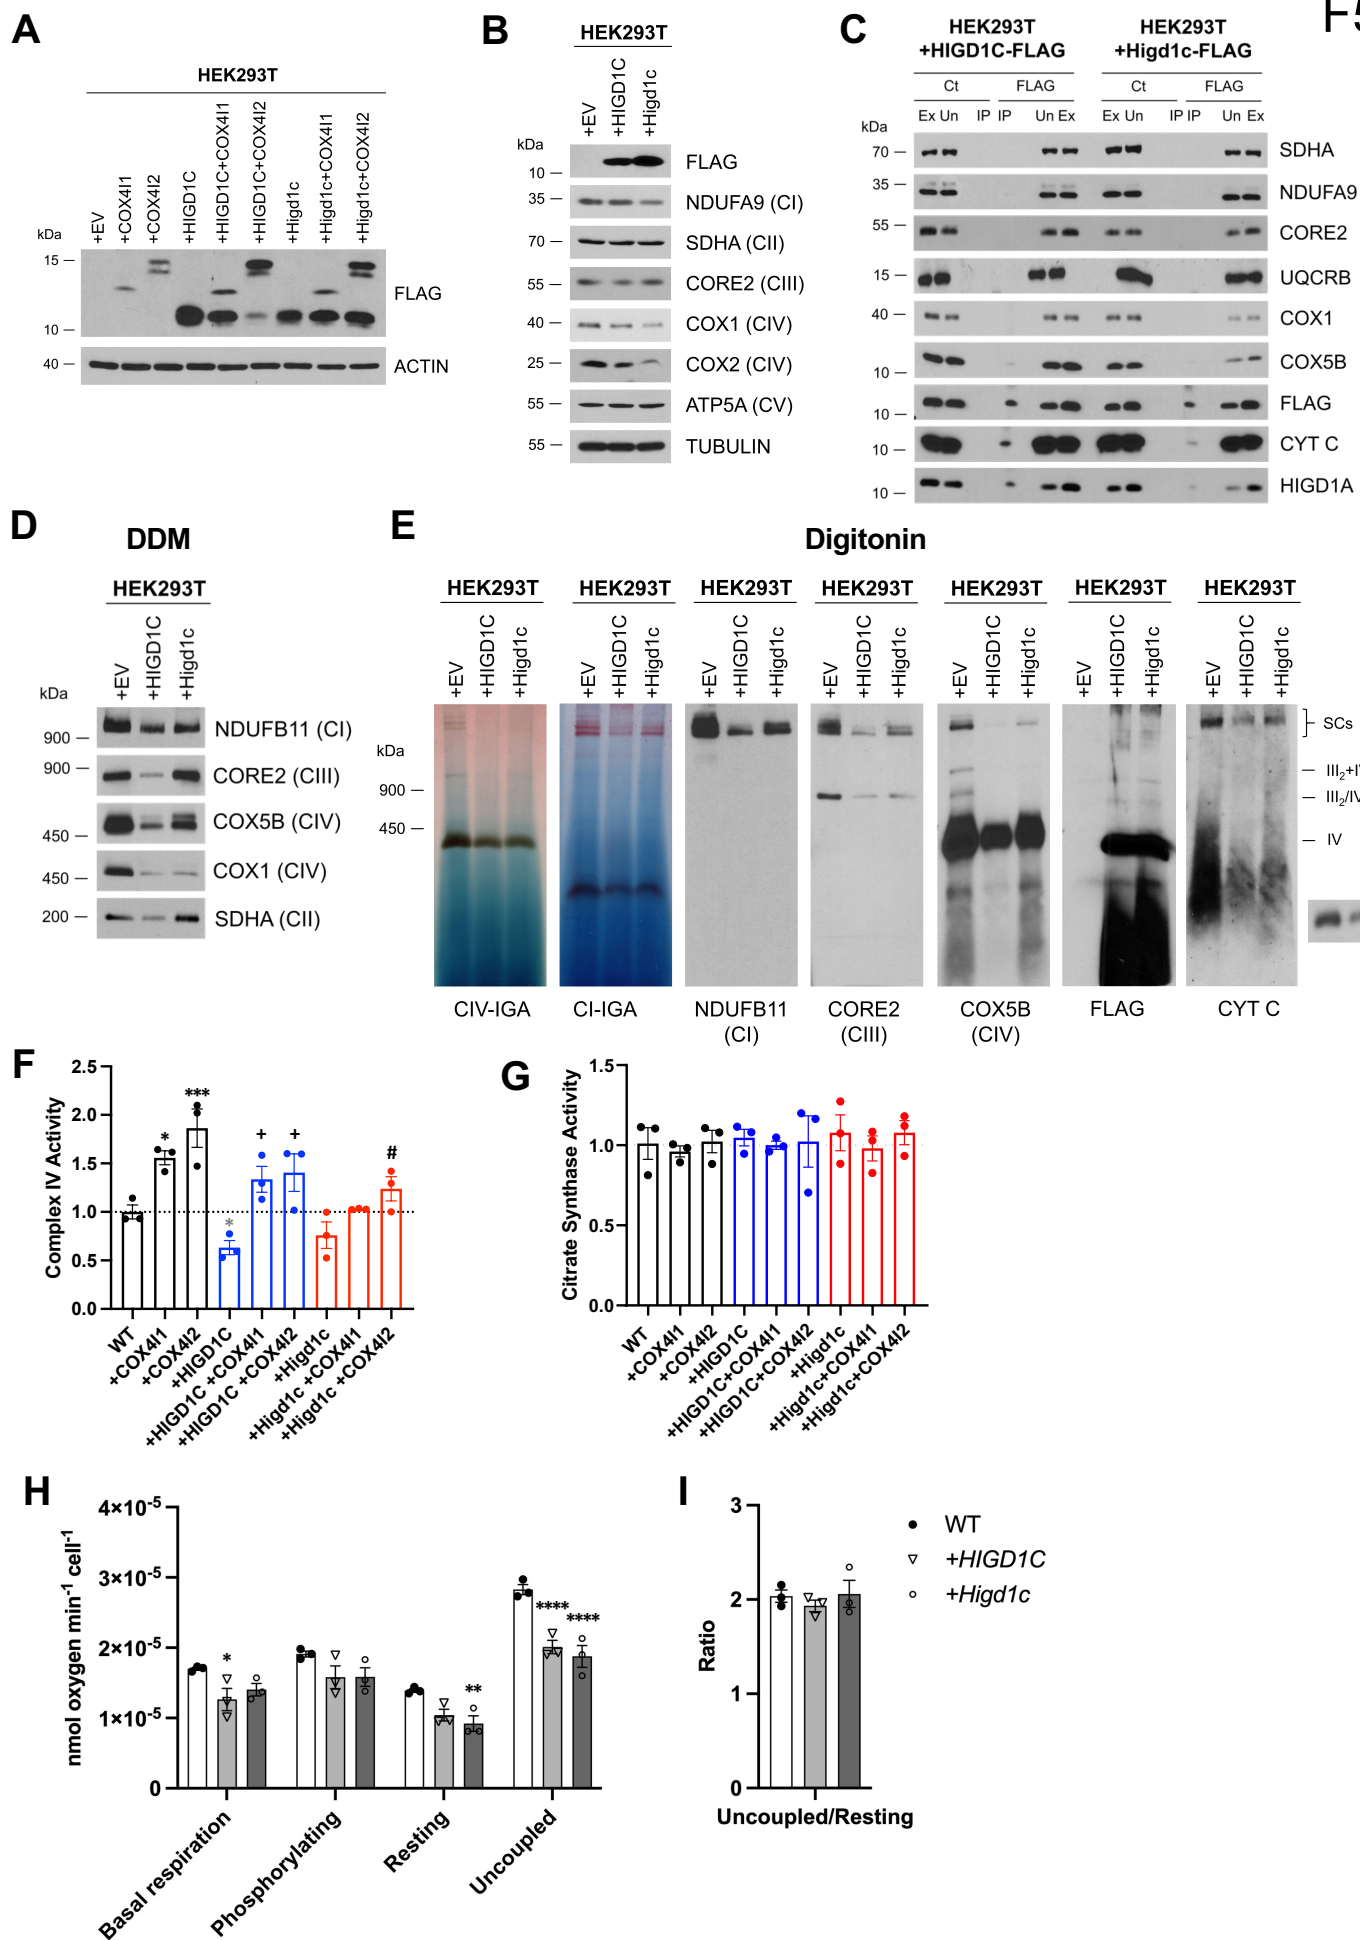

Supplement: supp [file elife-78915-supp-v1.zip]

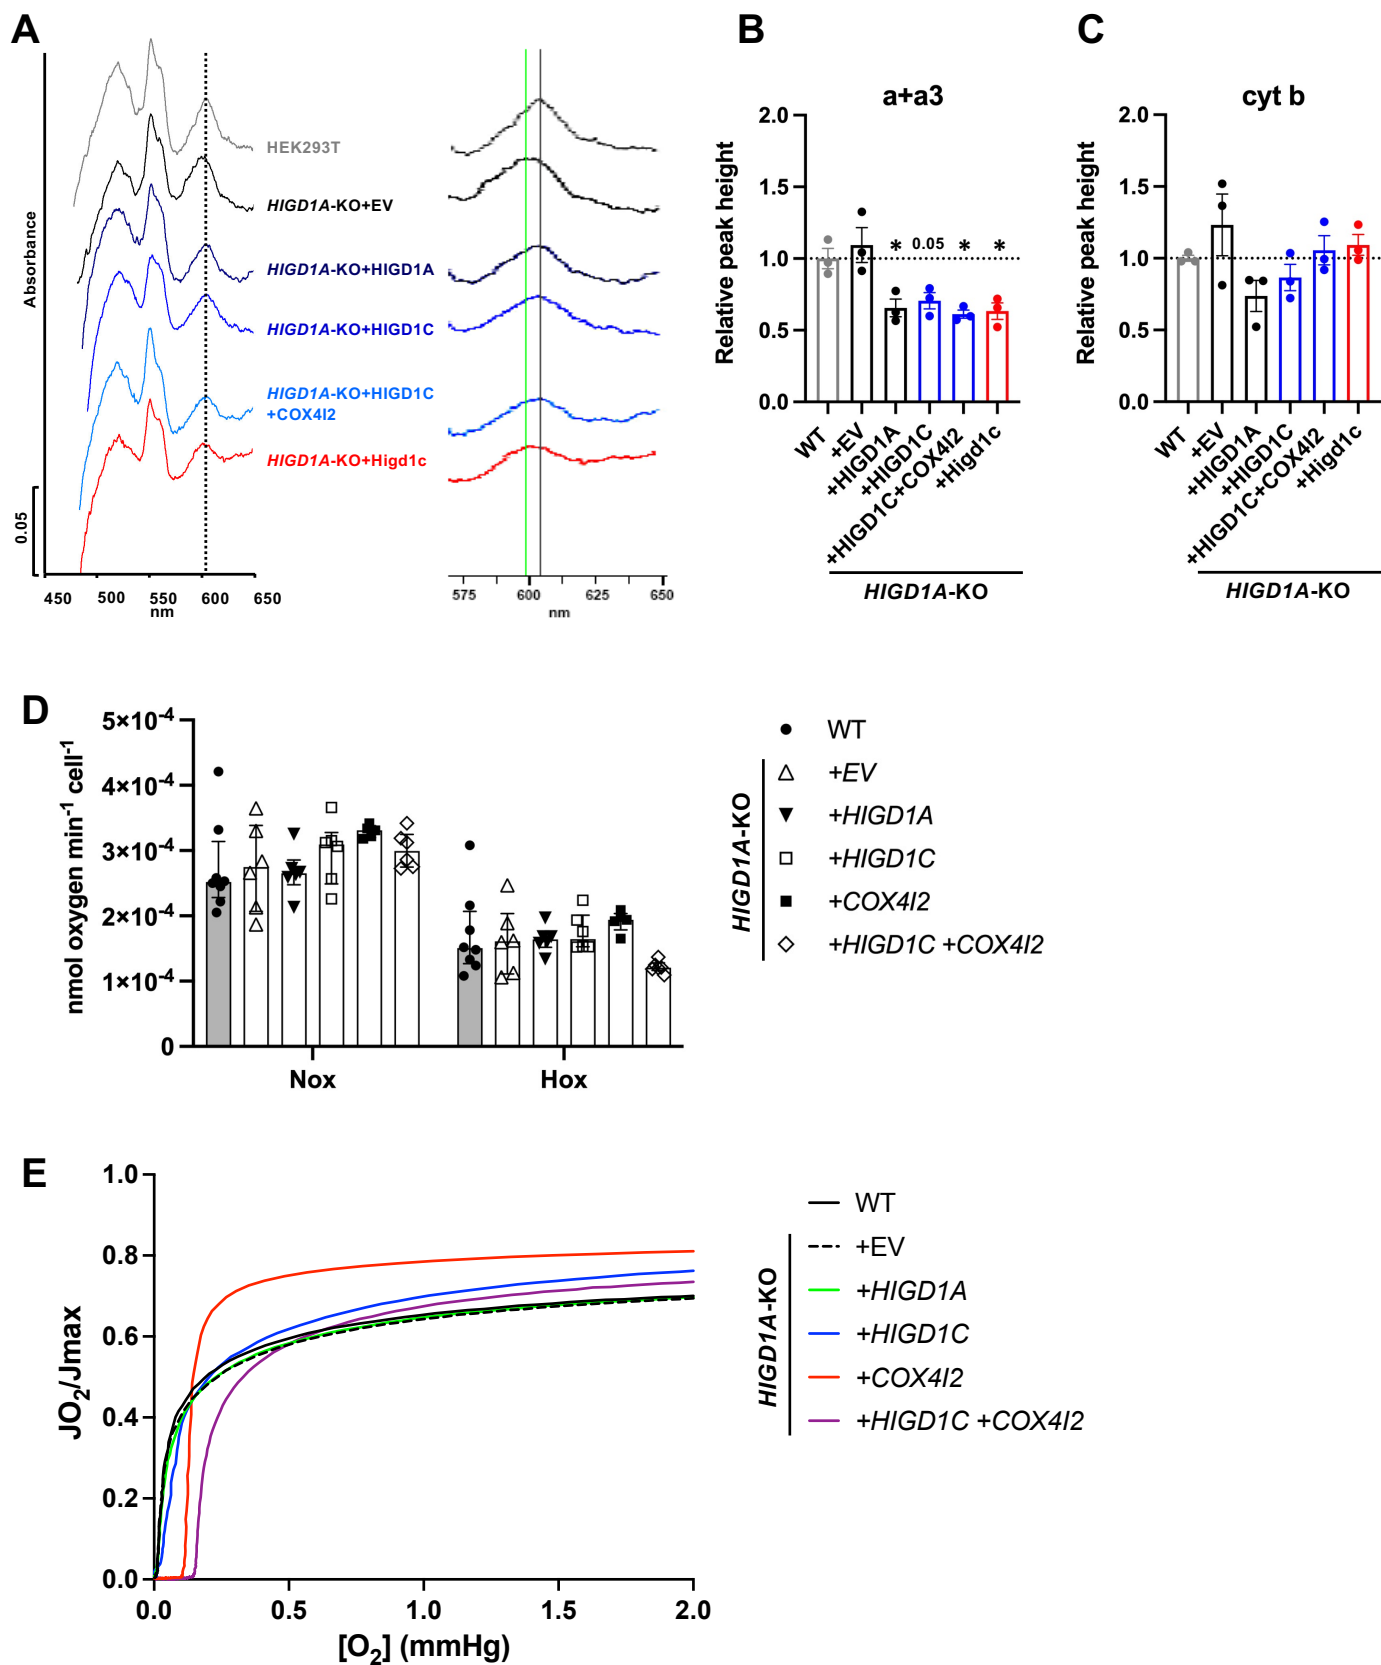

Supplement: supp [file elife-78915-supp-v1.zip]

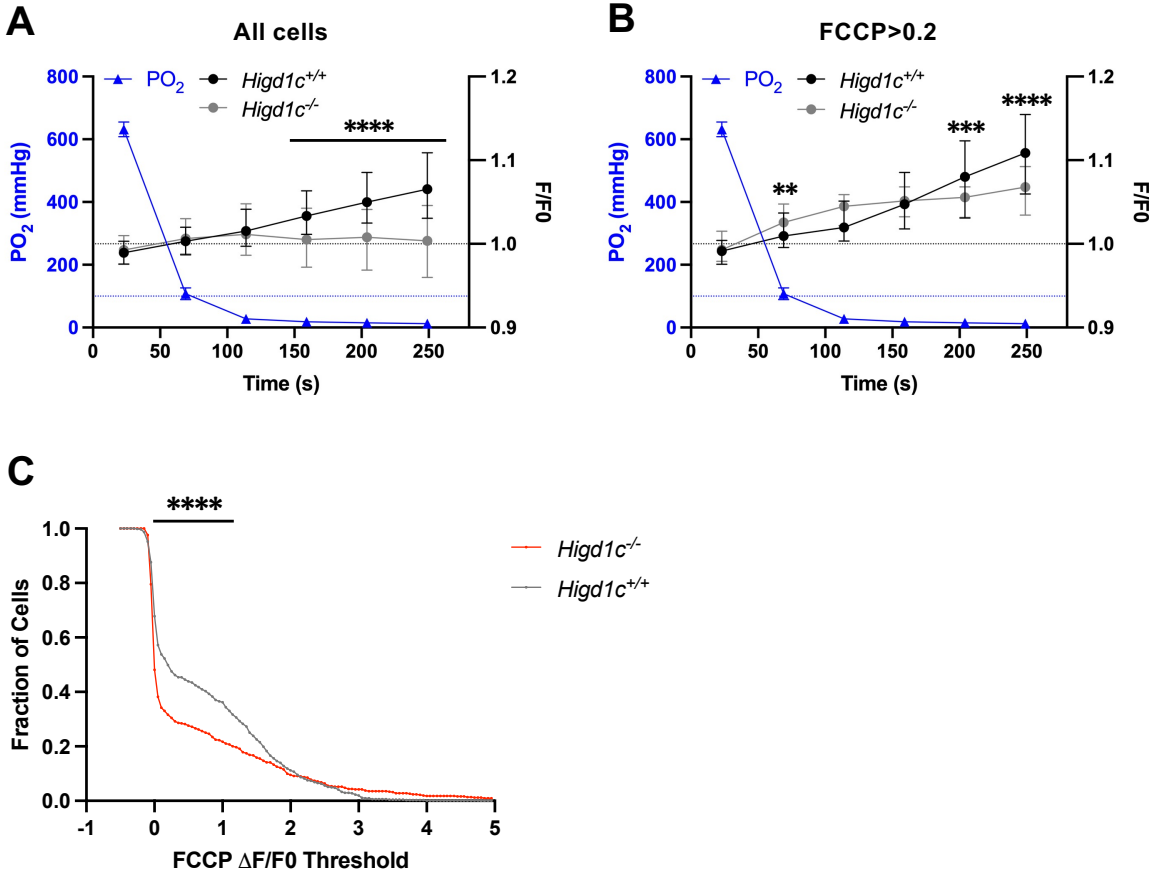

Supplement: supp [file elife-78915-supp-v1.zip]
